# Supplementary material for: Molecular mechanisms of fat deposition: &lt;i&gt;IL-6&lt;/i&gt; is a hub gene in fat lipolysis, comparing thin-tailed with fat-tailed sheep breeds
Source: Copernicus journal article supplement (doi:10.5194/aab-64-53-2021), 2021-02-17
Supplement: Supplementary file 1 [file S1.xlsx]

## Sheet: Sheet1
test_id	gene_id	gene	locus	sample_1	sample_2	status	value_1	value_2	log2(fold_change)	test_stat	p_value	q_value	significant
XLOC_014387	XLOC_014387	ENSOARG00000014064	19:20151630-20153047	Ghezel	Zel	OK	6447.54	0.550157	-13.5166	-7.233	5e-05	0.00554255	yes
XLOC_000958	XLOC_000958	ENSOARG00000020092	1:184627806-184734918	Ghezel	Zel	OK	21.7586	0.319268	-6.09068	-4.61724	5e-05	0.00554255	yes
XLOC_000958	XLOC_000958	ENSOARG00000020086	1:184627806-184734918	Ghezel	Zel	OK	21.7586	0.319268	-6.09068	-4.61724	5e-05	0.00554255	yes
XLOC_014577	XLOC_014577	LTF	19:52858037-52903939	Ghezel	Zel	OK	123.62	2.35871	-5.71177	-6.07223	5e-05	0.00554255	yes
XLOC_011143	XLOC_011143	DNHD1	15:45895850-45960053	Ghezel	Zel	OK	4.95559	0.144098	-5.10393	-2.46508	0.00065	0.0369101	yes
XLOC_016100	XLOC_016100	ENSOARG00000020354	2:223841326-223881444	Ghezel	Zel	OK	10.834	0.366465	-4.88575	-3.97963	5e-05	0.00554255	yes
XLOC_007686	XLOC_007686	LBP	13:66798217-66836246	Ghezel	Zel	OK	37.4409	1.45495	-4.68557	-3.77736	5e-05	0.00554255	yes
XLOC_028886	XLOC_028886	ENSOARG00000001451	13:66798217-66836247	Ghezel	Zel	OK	3.05697	0.137528	-4.47431	-1.3534	0.00095	0.0463653	yes
XLOC_028886	XLOC_028886	CYP4F8	13:66798217-66836247	Ghezel	Zel	OK	3.05697	0.137528	-4.47431	-1.3534	0.00095	0.0463653	yes
XLOC_028886	XLOC_028886	CYP4F21	13:66798217-66836247	Ghezel	Zel	OK	3.05697	0.137528	-4.47431	-1.3534	0.00095	0.0463653	yes
XLOC_024921	XLOC_024921	MBOAT2	13:66798217-66836248	Ghezel	Zel	OK	67.0949	3.44923	-4.28186	-4.10443	5e-05	0.00554255	yes
XLOC_030273	XLOC_030273	RF00156	13:66798217-66836249	Ghezel	Zel	OK	2.72256	0.151623	-4.1664	-2.99609	0.0005	0.0310119	yes
XLOC_006356	XLOC_006356	TNFRSF9	13:66798217-66836250	Ghezel	Zel	OK	5.51866	0.353264	-3.9655	-3.20661	0.00015	0.0135325	yes
XLOC_034857	XLOC_034857	ENSOARG00000002109	13:66798217-66836251	Ghezel	Zel	OK	68.3009	4.92399	-3.79401	-2.32463	0.0001	0.010266	yes
XLOC_030271	XLOC_030271	ENPEP	13:66798217-66836252	Ghezel	Zel	OK	67.7354	4.94398	-3.77617	-4.897	5e-05	0.00554255	yes
XLOC_028346	XLOC_028346	ACSL6	13:66798217-66836253	Ghezel	Zel	OK	5.56865	0.426039	-3.70827	-2.2187	0.0003	0.0228175	yes
XLOC_025012	XLOC_025012	PCYOX1	13:66798217-66836254	Ghezel	Zel	OK	287.807	22.8163	-3.65697	-4.19906	5e-05	0.00554255	yes
XLOC_002026	XLOC_002026	CRABP2	13:66798217-66836255	Ghezel	Zel	OK	193.796	15.5235	-3.64201	-3.11604	5e-05	0.00554255	yes
XLOC_006623	XLOC_006623	ENSOARG00000008550	13:66798217-66836256	Ghezel	Zel	OK	7.72156	0.624002	-3.62927	-4.21196	5e-05	0.00554255	yes
XLOC_016935	XLOC_016935	GALNT13	13:66798217-66836257	Ghezel	Zel	OK	2.63674	0.216344	-3.60736	-4.27367	5e-05	0.00554255	yes
XLOC_033518	XLOC_033518	TNFRSF11B	13:66798217-66836258	Ghezel	Zel	OK	1.67414	0.146488	-3.51456	-2.28831	0.00085	0.0435233	yes
XLOC_000559	XLOC_000559	S100A9	13:66798217-66836259	Ghezel	Zel	OK	534.509	46.7749	-3.51441	-3.28132	5e-05	0.00554255	yes
XLOC_036618	XLOC_036618	ENSOARG00000005449	13:66798217-66836260	Ghezel	Zel	OK	44.3764	4.04071	-3.45711	-4.63921	5e-05	0.00554255	yes
XLOC_025581	XLOC_025581	SLC16A7	13:66798217-66836261	Ghezel	Zel	OK	225.673	21.0514	-3.42225	-5.48685	5e-05	0.00554255	yes
XLOC_002213	XLOC_002213	ROBO1	13:66798217-66836262	Ghezel	Zel	OK	3.0843	0.293398	-3.39401	-2.30533	5e-05	0.00554255	yes
XLOC_002213	XLOC_002213	ENSOARG00000016815	13:66798217-66836262	Ghezel	Zel	OK	3.0843	0.293398	-3.39401	-2.30533	5e-05	0.00554255	yes
XLOC_035697	XLOC_035697	ENSOARG00000002937	13:66798217-66836263	Ghezel	Zel	OK	2418.92	253.888	-3.2521	-2.04765	0.0008	0.0418894	yes
XLOC_010777	XLOC_010777	EHF	13:66798217-66836264	Ghezel	Zel	OK	10.8036	1.14158	-3.24241	-3.51193	0.0001	0.010266	yes
XLOC_012317	XLOC_012317	TMEM154	13:66798217-66836265	Ghezel	Zel	OK	9.01525	0.963228	-3.22642	-3.13235	5e-05	0.00554255	yes
XLOC_006834	XLOC_006834	ENSOARG00000005207	13:66798217-66836266	Ghezel	Zel	OK	33.1737	3.54691	-3.22541	-2.43259	0.0004	0.0272418	yes
XLOC_016059	XLOC_016059	SLC11A1	13:66798217-66836267	Ghezel	Zel	OK	11.3623	1.25011	-3.18413	-2.98591	5e-05	0.00554255	yes
XLOC_002127	XLOC_002127	FAM78B	13:66798217-66836268	Ghezel	Zel	OK	23.791	2.64992	-3.1664	-1.98071	0.00095	0.0463653	yes
XLOC_000250	XLOC_000250	AK4	13:66798217-66836269	Ghezel	Zel	OK	128.658	14.4533	-3.15407	-2.77029	5e-05	0.00554255	yes
XLOC_002583	XLOC_002583	ENSOARG00000006817	13:66798217-66836270	Ghezel	Zel	OK	181.119	20.5439	-3.14016	-4.81002	0.00015	0.0135325	yes
XLOC_022665	XLOC_022665	SLC25A16	13:66798217-66836271	Ghezel	Zel	OK	148.297	17.3609	-3.09457	-7.53681	5e-05	0.00554255	yes
XLOC_034903	XLOC_034903	ENSOARG00000000857	13:66798217-66836272	Ghezel	Zel	OK	112.571	13.8606	-3.02177	-2.60639	0.00035	0.0249795	yes
XLOC_023539	XLOC_023539	FAM84A	13:66798217-66836273	Ghezel	Zel	OK	24.2526	3.02162	-3.00475	-3.44528	5e-05	0.00554255	yes
XLOC_005049	XLOC_005049	ENSOARG00000005452	13:66798217-66836274	Ghezel	Zel	OK	202.389	25.3858	-2.99504	-4.70145	5e-05	0.00554255	yes
XLOC_031308	XLOC_031308	HIF1A	13:66798217-66836275	Ghezel	Zel	OK	138.471	17.3936	-2.99295	-3.77834	5e-05	0.00554255	yes
XLOC_001197	XLOC_001197	PLOD2	13:66798217-66836276	Ghezel	Zel	OK	102.907	13.1185	-2.97167	-6.19327	5e-05	0.00554255	yes
XLOC_018691	XLOC_018691	DQA	13:66798217-66836277	Ghezel	Zel	OK	11.3297	1.51565	-2.9021	-3.95002	5e-05	0.00554255	yes
XLOC_001253	XLOC_001253	ENSOARG00000025635	13:66798217-66836278	Ghezel	Zel	OK	61.0821	8.35994	-2.86918	-3.66552	5e-05	0.00554255	yes
XLOC_030165	XLOC_030165	ENSOARG00000008716	13:66798217-66836279	Ghezel	Zel	OK	42.0506	5.82562	-2.85164	-6.14213	5e-05	0.00554255	yes
XLOC_035391	XLOC_035391	ENSOARG00000000795	13:66798217-66836280	Ghezel	Zel	OK	29.0563	4.08721	-2.82967	-3.31484	0.0005	0.0310119	yes
XLOC_035922	XLOC_035922	ENSOARG00000018086	13:66798217-66836281	Ghezel	Zel	OK	4.54664	0.655592	-2.79393	-3.39215	5e-05	0.00554255	yes
XLOC_013037	XLOC_013037	ENSOARG00000012457	13:66798217-66836282	Ghezel	Zel	OK	53.9877	8.17151	-2.72396	-2.47459	0.00075	0.0400769	yes
XLOC_000252	XLOC_000252	LEPR	13:66798217-66836283	Ghezel	Zel	OK	2.3953	0.369465	-2.6967	-3.06943	0.00055	0.0331272	yes
XLOC_004025	XLOC_004025	KCTD12	13:66798217-66836284	Ghezel	Zel	OK	55.6831	8.92166	-2.64185	-3.42483	5e-05	0.00554255	yes
XLOC_015688	XLOC_015688	CBR4	13:66798217-66836285	Ghezel	Zel	OK	13.9055	2.23607	-2.63662	-2.80887	0.0003	0.0228175	yes
XLOC_010462	XLOC_010462	BCO2	13:66798217-66836286	Ghezel	Zel	OK	117.3	19.0066	-2.62563	-2.87501	5e-05	0.00554255	yes
XLOC_007359	XLOC_007359	THNSL1	13:66798217-66836287	Ghezel	Zel	OK	3.51102	0.578186	-2.60228	-3.46976	5e-05	0.00554255	yes
XLOC_001229	XLOC_001229	PIK3CB	13:66798217-66836288	Ghezel	Zel	OK	20.1494	3.33899	-2.59325	-4.76976	5e-05	0.00554255	yes
XLOC_012037	XLOC_012037	C7	13:66798217-66836289	Ghezel	Zel	OK	82.3262	13.7171	-2.58538	-2.83612	5e-05	0.00554255	yes
XLOC_020914	XLOC_020914	DCC	13:66798217-66836290	Ghezel	Zel	OK	0.781981	0.131807	-2.56871	-2.28055	0.00035	0.0249795	yes
XLOC_034297	XLOC_034297	ENSOARG00000002901	13:66798217-66836291	Ghezel	Zel	OK	40.9317	7.03402	-2.5408	-2.63206	5e-05	0.00554255	yes
XLOC_002717	XLOC_002717	HACL1	13:66798217-66836292	Ghezel	Zel	OK	266.758	45.989	-2.53617	-3.13639	5e-05	0.00554255	yes
XLOC_018587	XLOC_018587	GLO1	13:66798217-66836293	Ghezel	Zel	OK	189.115	32.6801	-2.53277	-2.16024	0.00015	0.0135325	yes
XLOC_023806	XLOC_023806	CYP1B1	13:66798217-66836294	Ghezel	Zel	OK	23.5449	4.0866	-2.52644	-4.40311	5e-05	0.00554255	yes
XLOC_024948	XLOC_024948	ENSOARG00000017166	13:66798217-66836295	Ghezel	Zel	OK	35.7724	6.27719	-2.51066	-2.37612	0.00025	0.0198855	yes
XLOC_025160	XLOC_025160	FOXN2	13:66798217-66836296	Ghezel	Zel	OK	20.2133	3.62126	-2.48074	-5.893	5e-05	0.00554255	yes
XLOC_010987	XLOC_010987	ENSOARG00000014873	13:66798217-66836297	Ghezel	Zel	OK	14.5198	2.6058	-2.47822	-3.09649	0.0001	0.010266	yes
XLOC_024674	XLOC_024674	PNPLA3	13:66798217-66836298	Ghezel	Zel	OK	62.489	11.2866	-2.46899	-2.15289	0.0001	0.010266	yes
XLOC_031239	XLOC_031239	SPPL2A	13:66798217-66836299	Ghezel	Zel	OK	46.6235	8.5179	-2.45249	-4.90043	5e-05	0.00554255	yes
XLOC_016872	XLOC_016872	PDK1	13:66798217-66836300	Ghezel	Zel	OK	24.0286	4.432	-2.43872	-2.91806	5e-05	0.00554255	yes
XLOC_029497	XLOC_029497	STARD4	13:66798217-66836301	Ghezel	Zel	OK	24.6196	4.57136	-2.42911	-1.63368	0.00025	0.0198855	yes
XLOC_031868	XLOC_031868	FGF7	13:66798217-66836302	Ghezel	Zel	OK	70.7675	13.2912	-2.41261	-5.16763	5e-05	0.00554255	yes
XLOC_002207	XLOC_002207	USP25	13:66798217-66836303	Ghezel	Zel	OK	29.7135	5.73106	-2.37425	-4.06766	0.00025	0.0198855	yes
XLOC_019544	XLOC_019544	ENSOARG00000006571	13:66798217-66836304	Ghezel	Zel	OK	503.707	97.3755	-2.37095	-2.16173	0.0002	0.0170122	yes
XLOC_007892	XLOC_007892	CDNF	13:66798217-66836305	Ghezel	Zel	OK	14.7406	2.87928	-2.35602	-2.68334	5e-05	0.00554255	yes
XLOC_012032	XLOC_012032	GHR	13:66798217-66836306	Ghezel	Zel	OK	355.291	69.5399	-2.35309	-3.71107	5e-05	0.00554255	yes
XLOC_025756	XLOC_025756	CCDC91	13:66798217-66836307	Ghezel	Zel	OK	32.6685	6.45628	-2.33913	-4.60954	5e-05	0.00554255	yes
XLOC_020291	XLOC_020291	ACADSB	13:66798217-66836308	Ghezel	Zel	OK	20.0824	3.97041	-2.33857	-2.25708	0.0006	0.0350252	yes
XLOC_020355	XLOC_020355	PRKG1	13:66798217-66836309	Ghezel	Zel	OK	5.21978	1.03285	-2.33736	-3.88591	5e-05	0.00554255	yes
XLOC_007478	XLOC_007478	IDI1	13:66798217-66836310	Ghezel	Zel	OK	189.1	37.8729	-2.31991	-2.68477	0.00065	0.0369101	yes
XLOC_007769	XLOC_007769	SLC2A10	13:66798217-66836311	Ghezel	Zel	OK	3.59385	0.723467	-2.31253	-1.95246	0.001	0.047908	yes
XLOC_024157	XLOC_024157	ABCD2	13:66798217-66836312	Ghezel	Zel	OK	34.2095	6.96221	-2.29678	-4.34551	5e-05	0.00554255	yes
XLOC_032743	XLOC_032743	ME1	13:66798217-66836313	Ghezel	Zel	OK	33.8915	6.91198	-2.29375	-3.27858	5e-05	0.00554255	yes
XLOC_006779	XLOC_006779	NMNAT1	13:66798217-66836314	Ghezel	Zel	OK	34.6105	7.08248	-2.28888	-2.40297	0.00105	0.0495068	yes
XLOC_001042	XLOC_001042	EHHADH	13:66798217-66836315	Ghezel	Zel	OK	44.0595	9.21275	-2.25775	-3.65913	5e-05	0.00554255	yes
XLOC_021492	XLOC_021492	ACSM3	13:66798217-66836316	Ghezel	Zel	OK	224.686	47.1254	-2.25333	-3.19407	5e-05	0.00554255	yes
XLOC_032791	XLOC_032791	NT5DC1	13:66798217-66836317	Ghezel	Zel	OK	9.43313	1.98149	-2.25115	-2.8296	0.00025	0.0198855	yes
XLOC_036231	XLOC_036231	ENSOARG00000009444	13:66798217-66836318	Ghezel	Zel	OK	19.6374	4.14034	-2.24578	-3.71161	5e-05	0.00554255	yes
XLOC_033789	XLOC_033789	IMPAD1	13:66798217-66836319	Ghezel	Zel	OK	36.7317	7.86074	-2.22429	-4.62105	5e-05	0.00554255	yes
XLOC_028588	XLOC_028588	ENSOARG00000001652	13:66798217-66836320	Ghezel	Zel	OK	17.3089	3.71669	-2.21942	-3.42239	5e-05	0.00554255	yes
XLOC_031890	XLOC_031890	DDHD1	13:66798217-66836321	Ghezel	Zel	OK	18.1913	3.92181	-2.21366	-3.77746	5e-05	0.00554255	yes
XLOC_031790	XLOC_031790	L2HGDH	13:66798217-66836322	Ghezel	Zel	OK	5.40584	1.17132	-2.20638	-3.2077	5e-05	0.00554255	yes
XLOC_035580	XLOC_035580	ENSOARG00000002469	13:66798217-66836323	Ghezel	Zel	OK	1201.91	264.677	-2.18303	-2.25816	5e-05	0.00554255	yes
XLOC_035580	XLOC_035580	ENSOARG00000002466	13:66798217-66836323	Ghezel	Zel	OK	1201.91	264.677	-2.18303	-2.25816	5e-05	0.00554255	yes
XLOC_020145	XLOC_020145	ENSOARG00000010049	13:66798217-66836324	Ghezel	Zel	OK	581.751	128.232	-2.18165	-1.92385	0.00075	0.0400769	yes
XLOC_015971	XLOC_015971	BZW1	13:66798217-66836325	Ghezel	Zel	OK	127.125	28.1242	-2.17636	-4.0469	0.00015	0.0135325	yes
XLOC_022787	XLOC_022787	TFAM	13:66798217-66836326	Ghezel	Zel	OK	15.5541	3.4492	-2.17296	-2.68872	0.00065	0.0369101	yes
XLOC_013906	XLOC_013906	CFL2	13:66798217-66836327	Ghezel	Zel	OK	83.6478	18.6348	-2.16633	-4.23947	0.0006	0.0350252	yes
XLOC_010725	XLOC_010725	ENSOARG00000011251	13:66798217-66836328	Ghezel	Zel	OK	17.4195	3.92576	-2.14966	-1.78757	0.00035	0.0249795	yes
XLOC_011841	XLOC_011841	RETREG1	13:66798217-66836329	Ghezel	Zel	OK	23.1236	5.21447	-2.14878	-3.42311	5e-05	0.00554255	yes
XLOC_002400	XLOC_002400	KNG1	13:66798217-66836330	Ghezel	Zel	OK	46.4968	10.4922	-2.14782	-2.47249	0.00035	0.0249795	yes
XLOC_025782	XLOC_025782	GOLT1B	13:66798217-66836331	Ghezel	Zel	OK	30.498	6.94111	-2.13548	-2.89499	0.0001	0.010266	yes
XLOC_019513	XLOC_019513	FOLH1	13:66798217-66836332	Ghezel	Zel	OK	21.6286	5.01501	-2.10861	-2.08817	0.00015	0.0135325	yes
XLOC_032915	XLOC_032915	VNN1	13:66798217-66836333	Ghezel	Zel	OK	6.22244	1.45757	-2.09392	-2.57942	0.0002	0.0170122	yes
XLOC_027459	XLOC_027459	NAMPT	13:66798217-66836334	Ghezel	Zel	OK	27.0657	6.37655	-2.08562	-2.67383	0.0004	0.0272418	yes
XLOC_012076	XLOC_012076	ENSOARG00000012895	13:66798217-66836335	Ghezel	Zel	OK	550.557	130	-2.08238	-2.05987	0.0009	0.0448708	yes
XLOC_032005	XLOC_032005	ALDH6A1	13:66798217-66836336	Ghezel	Zel	OK	68.4117	16.1648	-2.08139	-3.26829	5e-05	0.00554255	yes
XLOC_016561	XLOC_016561	GRHPR	13:66798217-66836337	Ghezel	Zel	OK	41.1037	9.76908	-2.07297	-2.45936	0.00015	0.0135325	yes
XLOC_022533	XLOC_022533	PRXL2A	13:66798217-66836338	Ghezel	Zel	OK	212.719	51.3278	-2.05114	-2.53899	0.0007	0.0389013	yes
XLOC_026913	XLOC_026913	TFEC	13:66798217-66836339	Ghezel	Zel	OK	1.58233	0.383233	-2.04576	-2.99222	0.0009	0.0448708	yes
XLOC_035853	XLOC_035853	TLR7	13:66798217-66836340	Ghezel	Zel	OK	9.42778	2.28444	-2.04508	-2.70696	5e-05	0.00554255	yes
XLOC_011803	XLOC_011803	LMBRD2	13:66798217-66836341	Ghezel	Zel	OK	5.40335	1.31102	-2.04316	-4.35932	5e-05	0.00554255	yes
XLOC_014844	XLOC_014844	ALAS1	13:66798217-66836342	Ghezel	Zel	OK	142.454	34.8623	-2.03075	-1.90279	0.0006	0.0350252	yes
XLOC_020384	XLOC_020384	IDE	13:66798217-66836343	Ghezel	Zel	OK	8.32602	2.04132	-2.02813	-3.11912	5e-05	0.00554255	yes
XLOC_035328	XLOC_035328	ENSOARG00000000313	13:66798217-66836344	Ghezel	Zel	OK	104.24	25.8458	-2.0119	-1.68425	0.00065	0.0369101	yes
XLOC_000943	XLOC_000943	POGLUT1	13:66798217-66836345	Ghezel	Zel	OK	4.99807	1.23932	-2.01182	-2.74534	0.0002	0.0170122	yes
XLOC_036845	XLOC_036845	VMA21	13:66798217-66836346	Ghezel	Zel	OK	13.8228	3.45992	-1.99824	-1.93562	0.0002	0.0170122	yes
XLOC_030404	XLOC_030404	COMMD8	13:66798217-66836347	Ghezel	Zel	OK	28.3352	7.11361	-1.99394	-2.7144	0.00065	0.0369101	yes
XLOC_036057	XLOC_036057	YIPF6	13:66798217-66836348	Ghezel	Zel	OK	15.0859	3.81302	-1.9842	-1.91656	0.001	0.047908	yes
XLOC_025131	XLOC_025131	PEX13	13:66798217-66836349	Ghezel	Zel	OK	17.0395	4.35049	-1.96963	-4.26927	0.00015	0.0135325	yes
XLOC_025131	XLOC_025131	KIAA1841	13:66798217-66836349	Ghezel	Zel	OK	17.0395	4.35049	-1.96963	-4.26927	0.00015	0.0135325	yes
XLOC_023132	XLOC_023132	ZDHHC2	13:66798217-66836350	Ghezel	Zel	OK	190.383	48.653	-1.96831	-2.77143	0.00095	0.0463653	yes
XLOC_004374	XLOC_004374	SCPEP1	13:66798217-66836351	Ghezel	Zel	OK	514.379	131.821	-1.96425	-1.96246	0.0005	0.0310119	yes
XLOC_030389	XLOC_030389	RBM47	13:66798217-66836352	Ghezel	Zel	OK	6.43062	1.65056	-1.962	-2.58904	5e-05	0.00554255	yes
XLOC_002537	XLOC_002537	MBNL1	13:66798217-66836353	Ghezel	Zel	OK	59.5964	15.3087	-1.96087	-3.85091	5e-05	0.00554255	yes
XLOC_027047	XLOC_027047	CPED1	13:66798217-66836354	Ghezel	Zel	OK	13.3575	3.44905	-1.95338	-3.47112	5e-05	0.00554255	yes
XLOC_016598	XLOC_016598	PSAT1	13:66798217-66836355	Ghezel	Zel	OK	9.68634	2.50215	-1.95278	-2.18623	0.00025	0.0198855	yes
XLOC_035083	XLOC_035083	ENSOARG00000016159	13:66798217-66836356	Ghezel	Zel	OK	13.4112	3.46696	-1.95169	-3.6179	5e-05	0.00554255	yes
XLOC_014357	XLOC_014357	ABHD5	13:66798217-66836357	Ghezel	Zel	OK	91.1709	23.6723	-1.94538	-2.92816	5e-05	0.00554255	yes
XLOC_006703	XLOC_006703	SCCPDH	13:66798217-66836358	Ghezel	Zel	OK	61.252	15.9193	-1.94398	-2.88078	5e-05	0.00554255	yes
XLOC_002535	XLOC_002535	P2RY1	13:66798217-66836359	Ghezel	Zel	OK	4.41736	1.15534	-1.93486	-2.25646	0.00035	0.0249795	yes
XLOC_030896	XLOC_030896	POLK	13:66798217-66836360	Ghezel	Zel	OK	3.84869	1.0072	-1.93402	-3.35303	0.0004	0.0272418	yes
XLOC_033439	XLOC_033439	UBXN2B	13:66798217-66836361	Ghezel	Zel	OK	10.2837	2.71414	-1.9218	-2.44595	5e-05	0.00554255	yes
XLOC_031895	XLOC_031895	GMFB	13:66798217-66836362	Ghezel	Zel	OK	23.9026	6.34216	-1.91412	-2.33595	0.00035	0.0249795	yes
XLOC_032847	XLOC_032847	MANEA	13:66798217-66836363	Ghezel	Zel	OK	3.80105	1.00923	-1.91314	-2.89825	0.0008	0.0418894	yes
XLOC_008246	XLOC_008246	ENSOARG00000006310	13:66798217-66836364	Ghezel	Zel	OK	116.746	30.9996	-1.91305	-2.08664	0.0009	0.0448708	yes
XLOC_029261	XLOC_029261	SAR1B	13:66798217-66836365	Ghezel	Zel	OK	25.261	6.73111	-1.90799	-3.17804	0.0008	0.0418894	yes
XLOC_032955	XLOC_032955	FBXO30	13:66798217-66836366	Ghezel	Zel	OK	4.45595	1.19482	-1.89894	-3.04963	5e-05	0.00554255	yes
XLOC_007311	XLOC_007311	ENSOARG00000004401	13:66798217-66836367	Ghezel	Zel	OK	59.6317	16.1023	-1.88881	-1.80295	0.00075	0.0400769	yes
XLOC_011086	XLOC_011086	PDE3B	13:66798217-66836368	Ghezel	Zel	OK	104.822	28.3443	-1.88681	-2.99148	0.00015	0.0135325	yes
XLOC_000927	XLOC_000927	ATP6V1A	13:66798217-66836369	Ghezel	Zel	OK	27.5786	7.48078	-1.88229	-3.06424	5e-05	0.00554255	yes
XLOC_017081	XLOC_017081	IDH1	13:66798217-66836370	Ghezel	Zel	OK	189.141	51.354	-1.88091	-2.45971	0.00095	0.0463653	yes
XLOC_002375	XLOC_002375	OPA1	13:66798217-66836371	Ghezel	Zel	OK	15.6962	4.28538	-1.87291	-3.29907	5e-05	0.00554255	yes
XLOC_029431	XLOC_029431	EDIL3	13:66798217-66836372	Ghezel	Zel	OK	5.98922	1.64482	-1.86444	-2.16292	0.0008	0.0418894	yes
XLOC_029989	XLOC_029989	SLC30A9	13:66798217-66836373	Ghezel	Zel	OK	18.2101	5.00129	-1.86437	-3.41655	5e-05	0.00554255	yes
XLOC_002727	XLOC_002727	SATB1	13:66798217-66836374	Ghezel	Zel	OK	11.3883	3.13179	-1.86249	-2.57655	5e-05	0.00554255	yes
XLOC_027381	XLOC_027381	SNX13	13:66798217-66836375	Ghezel	Zel	OK	12.1901	3.35392	-1.86179	-4.1867	5e-05	0.00554255	yes
XLOC_028796	XLOC_028796	CANX	13:66798217-66836376	Ghezel	Zel	OK	111.136	30.6364	-1.85901	-2.84374	0.00045	0.0293062	yes
XLOC_031507	XLOC_031507	MTX3	13:66798217-66836377	Ghezel	Zel	OK	2.55483	0.704792	-1.85796	-2.83298	0.0008	0.0418894	yes
XLOC_025235	XLOC_025235	SLC30A6	13:66798217-66836378	Ghezel	Zel	OK	8.236	2.27908	-1.85349	-2.72897	0.0002	0.0170122	yes
XLOC_029256	XLOC_029256	C5orf15	13:66798217-66836379	Ghezel	Zel	OK	98.0249	27.2186	-1.84856	-3.46512	5e-05	0.00554255	yes
XLOC_010431	XLOC_010431	CUL5	13:66798217-66836380	Ghezel	Zel	OK	7.81686	2.17424	-1.84608	-4.11622	5e-05	0.00554255	yes
XLOC_000813	XLOC_000813	NRIP1	13:66798217-66836381	Ghezel	Zel	OK	30.389	8.45764	-1.84522	-3.11029	0.0001	0.010266	yes
XLOC_002540	XLOC_002540	AADAC	13:66798217-66836382	Ghezel	Zel	OK	27.2335	7.58343	-1.84446	-2.34623	0.0004	0.0272418	yes
XLOC_002512	XLOC_002512	MFSD1	13:66798217-66836383	Ghezel	Zel	OK	37.1656	10.4214	-1.83442	-2.62516	0.0001	0.010266	yes
XLOC_012026	XLOC_012026	NNT	13:66798217-66836384	Ghezel	Zel	OK	47.7295	13.4977	-1.82217	-2.66597	0.00045	0.0293062	yes
XLOC_001743	XLOC_001743	GCLM	13:66798217-66836385	Ghezel	Zel	OK	9.56339	2.70604	-1.82134	-3.59433	0.0001	0.010266	yes
XLOC_027486	XLOC_027486	ENSOARG00000000161	13:66798217-66836386	Ghezel	Zel	OK	106.003	30.0924	-1.81663	-2.92034	0.00105	0.0495068	yes
XLOC_011090	XLOC_011090	FAR1	13:66798217-66836387	Ghezel	Zel	OK	15.893	4.51935	-1.81421	-3.56361	5e-05	0.00554255	yes
XLOC_002351	XLOC_002351	TFRC	13:66798217-66836388	Ghezel	Zel	OK	15.233	4.35077	-1.80786	-3.29106	5e-05	0.00554255	yes
XLOC_030498	XLOC_030498	G3BP2	13:66798217-66836389	Ghezel	Zel	OK	36.3612	10.4086	-1.80462	-2.23722	0.00015	0.0135325	yes
XLOC_023214	XLOC_023214	OXSM	13:66798217-66836390	Ghezel	Zel	OK	6.66882	1.91383	-1.80097	-2.15795	0.00055	0.0331272	yes
XLOC_001855	XLOC_001855	TBX15	13:66798217-66836391	Ghezel	Zel	OK	40.6977	11.6815	-1.80072	-2.24336	0.00035	0.0249795	yes
XLOC_000328	XLOC_000328	LRRC8D	13:66798217-66836392	Ghezel	Zel	OK	9.25199	2.65587	-1.80058	-2.32713	0.00085	0.0435233	yes
XLOC_010457	XLOC_010457	ENSOARG00000015712	13:66798217-66836393	Ghezel	Zel	OK	18.7227	5.37714	-1.79988	-2.72062	0.00015	0.0135325	yes
XLOC_033572	XLOC_033572	STK3	13:66798217-66836394	Ghezel	Zel	OK	29.5271	8.48374	-1.79927	-2.78838	0.00045	0.0293062	yes
XLOC_028763	XLOC_028763	PAM	13:66798217-66836395	Ghezel	Zel	OK	120.471	34.7422	-1.79393	-2.35697	0.0003	0.0228175	yes
XLOC_036497	XLOC_036497	GPM6B	13:66798217-66836396	Ghezel	Zel	OK	54.6839	15.7847	-1.79259	-2.54446	0.00105	0.0495068	yes
XLOC_000097	XLOC_000097	ZMPSTE24	13:66798217-66836397	Ghezel	Zel	OK	15.26	4.44843	-1.77839	-3.12979	5e-05	0.00554255	yes
XLOC_001898	XLOC_001898	ENSOARG00000013149	13:66798217-66836398	Ghezel	Zel	OK	167.07	48.8038	-1.77539	-1.52633	0.0009	0.0448708	yes
XLOC_035880	XLOC_035880	ENSOARG00000014550	13:66798217-66836399	Ghezel	Zel	OK	69.0068	20.1642	-1.77494	-2.57492	5e-05	0.00554255	yes
XLOC_030935	XLOC_030935	RAB11A	13:66798217-66836400	Ghezel	Zel	OK	59.9222	17.5681	-1.77013	-3.62258	5e-05	0.00554255	yes
XLOC_020248	XLOC_020248	ATRNL1	13:66798217-66836401	Ghezel	Zel	OK	6.03848	1.77247	-1.76843	-2.69464	0.0006	0.0350252	yes
XLOC_024953	XLOC_024953	LDAH	13:66798217-66836402	Ghezel	Zel	OK	8.07866	2.39075	-1.75665	-2.34259	0.0005	0.0310119	yes
XLOC_027034	XLOC_027034	VPS41	13:66798217-66836403	Ghezel	Zel	OK	20.5662	6.11468	-1.74992	-2.64812	0.00035	0.0249795	yes
XLOC_000816	XLOC_000816	HSPA13	13:66798217-66836404	Ghezel	Zel	OK	14.6301	4.39085	-1.73637	-3.82233	0.0004	0.0272418	yes
XLOC_002529	XLOC_002529	MME	13:66798217-66836405	Ghezel	Zel	OK	28.6653	8.60475	-1.7361	-2.4969	5e-05	0.00554255	yes
XLOC_015765	XLOC_015765	LNPK	13:66798217-66836406	Ghezel	Zel	OK	9.8481	2.9654	-1.73162	-2.83685	0.00085	0.0435233	yes
XLOC_009480	XLOC_009480	ITFG1	13:66798217-66836407	Ghezel	Zel	OK	54.8394	16.5398	-1.72927	-3.0151	5e-05	0.00554255	yes
XLOC_025680	XLOC_025680	ARL1	13:66798217-66836408	Ghezel	Zel	OK	53.7612	16.2469	-1.7264	-2.0044	0.0005	0.0310119	yes
XLOC_031481	XLOC_031481	COL4A3BP	13:66798217-66836409	Ghezel	Zel	OK	29.1693	8.84425	-1.72164	-3.22589	5e-05	0.00554255	yes
XLOC_018431	XLOC_018431	TPMT	13:66798217-66836410	Ghezel	Zel	OK	15.7982	4.79182	-1.72112	-2.47157	0.0004	0.0272418	yes
XLOC_023986	XLOC_023986	TMTC3	13:66798217-66836411	Ghezel	Zel	OK	6.5218	1.98284	-1.7177	-3.759	0.00055	0.0331272	yes
XLOC_003887	XLOC_003887	SUCLA2	13:66798217-66836412	Ghezel	Zel	OK	42.7479	13.0123	-1.71598	-2.60581	0.0002	0.0170122	yes
XLOC_022695	XLOC_022695	P4HA1	13:66798217-66836413	Ghezel	Zel	OK	26.6139	8.10807	-1.71475	-3.05783	0.00015	0.0135325	yes
XLOC_024822	XLOC_024822	FUBP3	13:66798217-66836414	Ghezel	Zel	OK	24.8153	7.58793	-1.70945	-2.61887	0.001	0.047908	yes
XLOC_029125	XLOC_029125	SNX2	13:66798217-66836415	Ghezel	Zel	OK	62.0504	19.0921	-1.70046	-2.6656	0.00025	0.0198855	yes
XLOC_003644	XLOC_003644	SLC46A3	13:66798217-66836416	Ghezel	Zel	OK	24.4728	7.53278	-1.69993	-2.13211	0.001	0.047908	yes
XLOC_035954	XLOC_035954	ATP6AP2	13:66798217-66836417	Ghezel	Zel	OK	35.8935	11.064	-1.69785	-3.51272	0.00015	0.0135325	yes
XLOC_016889	XLOC_016889	UBR3	13:66798217-66836418	Ghezel	Zel	OK	17.335	5.34511	-1.69739	-3.18427	0.0006	0.0350252	yes
XLOC_001002	XLOC_001002	ENSOARG00000020389	13:66798217-66836419	Ghezel	Zel	OK	47.7255	14.7693	-1.69216	-2.47128	0.0002	0.0170122	yes
XLOC_002302	XLOC_002302	GSK3B	13:66798217-66836420	Ghezel	Zel	OK	15.6306	4.84415	-1.69006	-3.06296	0.00025	0.0198855	yes
XLOC_025746	XLOC_025746	ENSOARG00000019292	13:66798217-66836422	Ghezel	Zel	OK	7.96712	2.50044	-1.67188	-3.27174	0.0005	0.0310119	yes
XLOC_029934	XLOC_029934	PPM1K	13:66798217-66836423	Ghezel	Zel	OK	37.5759	11.8309	-1.66725	-2.55565	0.00045	0.0293062	yes
XLOC_020265	XLOC_020265	SEC23IP	13:66798217-66836424	Ghezel	Zel	OK	8.54879	2.70159	-1.66191	-2.53736	0.0007	0.0389013	yes
XLOC_015350	XLOC_015350	ENSOARG00000008440	13:66798217-66836425	Ghezel	Zel	OK	6.93713	2.19908	-1.65744	-2.26991	0.00025	0.0198855	yes
XLOC_006460	XLOC_006460	SOAT1	13:66798217-66836426	Ghezel	Zel	OK	7.69946	2.44172	-1.65686	-2.94027	0.0003	0.0228175	yes
XLOC_025700	XLOC_025700	ALDH1L2	13:66798217-66836427	Ghezel	Zel	OK	31.8024	10.1076	-1.6537	-2.66545	0.00025	0.0198855	yes
XLOC_018614	XLOC_018614	MRPS10	13:66798217-66836428	Ghezel	Zel	OK	241.701	76.8739	-1.65266	-2.21712	0.00085	0.0435233	yes
XLOC_011945	XLOC_011945	TNPO1	13:66798217-66836429	Ghezel	Zel	OK	14.1024	4.49241	-1.65038	-3.47883	0.00035	0.0249795	yes
XLOC_002687	XLOC_002687	S100B	13:66798217-66836430	Ghezel	Zel	OK	436.874	139.289	-1.64914	-1.11278	0.00055	0.0331272	yes
XLOC_013671	XLOC_013671	EIF5	13:66798217-66836431	Ghezel	Zel	OK	82.2322	26.2328	-1.64833	-2.45933	0.0004	0.0272418	yes
XLOC_013455	XLOC_013455	SRP54	13:66798217-66836432	Ghezel	Zel	OK	12.4132	3.98527	-1.63912	-3.78046	0.0002	0.0170122	yes
XLOC_005375	XLOC_005375	ENSOARG00000014673	13:66798217-66836433	Ghezel	Zel	OK	17.6545	5.671	-1.63836	-1.96085	0.0006	0.0350252	yes
XLOC_011281	XLOC_011281	LGR4	13:66798217-66836434	Ghezel	Zel	OK	6.09265	1.9599	-1.63629	-2.73198	0.0004	0.0272418	yes
XLOC_000700	XLOC_000700	UHMK1	13:66798217-66836435	Ghezel	Zel	OK	8.58015	2.76053	-1.63606	-3.40928	5e-05	0.00554255	yes
XLOC_033865	XLOC_033865	TPD52	13:66798217-66836436	Ghezel	Zel	OK	28.3774	9.18	-1.62818	-2.94452	0.00025	0.0198855	yes
XLOC_025761	XLOC_025761	ENSOARG00000019757	13:66798217-66836437	Ghezel	Zel	OK	6.49996	2.10359	-1.62757	-2.76658	0.0007	0.0389013	yes
XLOC_025761	XLOC_025761	ARNTL2	13:66798217-66836437	Ghezel	Zel	OK	6.49996	2.10359	-1.62757	-2.76658	0.0007	0.0389013	yes
XLOC_015775	XLOC_015775	ENSOARG00000000451	13:66798217-66836438	Ghezel	Zel	OK	61.5934	20.1234	-1.6139	-3.03275	0.0002	0.0170122	yes
XLOC_025394	XLOC_025394	ATP2B1	13:66798217-66836439	Ghezel	Zel	OK	20.1927	6.6101	-1.61109	-2.83471	0.0002	0.0170122	yes
XLOC_020863	XLOC_020863	RAB31	13:66798217-66836440	Ghezel	Zel	OK	15.813	5.18476	-1.60876	-1.56459	0.0007	0.0389013	yes
XLOC_002702	XLOC_002702	HLCS	13:66798217-66836441	Ghezel	Zel	OK	23.3007	7.64477	-1.60783	-2.06648	0.0005	0.0310119	yes
XLOC_024145	XLOC_024145	TWF1	13:66798217-66836442	Ghezel	Zel	OK	18.9245	6.22283	-1.60462	-3.61249	5e-05	0.00554255	yes
XLOC_027126	XLOC_027126	STMP1	13:66798217-66836443	Ghezel	Zel	OK	89.5299	29.6569	-1.594	-2.95165	0.0002	0.0170122	yes
XLOC_006514	XLOC_006514	SLC30A1	13:66798217-66836444	Ghezel	Zel	OK	6.48537	2.15543	-1.58921	-3.64493	0.0004	0.0272418	yes
XLOC_011775	XLOC_011775	HMGCS1	13:66798217-66836445	Ghezel	Zel	OK	27.907	9.28569	-1.58755	-2.73396	0.00035	0.0249795	yes
XLOC_026937	XLOC_026937	HERPUD2	13:66798217-66836446	Ghezel	Zel	OK	64.5776	21.5733	-1.58179	-2.4759	0.00035	0.0249795	yes
XLOC_010794	XLOC_010794	API5	13:66798217-66836447	Ghezel	Zel	OK	25.893	8.66097	-1.57996	-3.11717	5e-05	0.00554255	yes
XLOC_035943	XLOC_035943	CYBB	13:66798217-66836448	Ghezel	Zel	OK	8.84049	2.95946	-1.57879	-2.31744	0.00035	0.0249795	yes
XLOC_015846	XLOC_015846	STAM2	13:66798217-66836449	Ghezel	Zel	OK	7.29428	2.44621	-1.57622	-3.25602	0.0003	0.0228175	yes
XLOC_026899	XLOC_026899	DLD	13:66798217-66836450	Ghezel	Zel	OK	55.9134	18.8402	-1.56938	-2.56455	0.00105	0.0495068	yes
XLOC_009473	XLOC_009473	VPS35	13:66798217-66836451	Ghezel	Zel	OK	46.6923	15.761	-1.56682	-2.44504	0.00075	0.0400769	yes
XLOC_023202	XLOC_023202	RNF170	13:66798217-66836452	Ghezel	Zel	OK	23.6228	8.00663	-1.56091	-2.41117	0.00035	0.0249795	yes
XLOC_022479	XLOC_022479	VPS26A	13:66798217-66836453	Ghezel	Zel	OK	52.1593	17.7197	-1.55757	-3.34872	0.00025	0.0198855	yes
XLOC_003744	XLOC_003744	ENSOARG00000017192	13:66798217-66836454	Ghezel	Zel	OK	20.862	7.1286	-1.54919	-2.12961	0.00045	0.0293062	yes
XLOC_003744	XLOC_003744	ENSOARG00000000573	13:66798217-66836454	Ghezel	Zel	OK	20.862	7.1286	-1.54919	-2.12961	0.00045	0.0293062	yes
XLOC_024938	XLOC_024938	FAM49A	13:66798217-66836455	Ghezel	Zel	OK	21.0177	7.28551	-1.52851	-2.0149	0.00065	0.0369101	yes
XLOC_033387	XLOC_033387	FAM49B	13:66798217-66836456	Ghezel	Zel	OK	31.7466	11.01	-1.52779	-2.68185	0.00075	0.0400769	yes
XLOC_006225	XLOC_006225	KCTD3	13:66798217-66836457	Ghezel	Zel	OK	16.5976	5.75638	-1.52774	-2.60523	0.0003	0.0228175	yes
XLOC_000733	XLOC_000733	SFT2D2	13:66798217-66836458	Ghezel	Zel	OK	9.46339	3.29553	-1.52185	-2.48648	0.0007	0.0389013	yes
XLOC_033833	XLOC_033833	TRAM1	13:66798217-66836459	Ghezel	Zel	OK	60.5475	21.1006	-1.52078	-3.42414	0.00035	0.0249795	yes
XLOC_032611	XLOC_032611	PEX3	13:66798217-66836460	Ghezel	Zel	OK	26.7607	9.36092	-1.5154	-2.1231	0.00055	0.0331272	yes
XLOC_011954	XLOC_011954	ENSOARG00000005496	13:66798217-66836461	Ghezel	Zel	OK	12.1413	4.25287	-1.51342	-2.5168	0.0007	0.0389013	yes
XLOC_010529	XLOC_010529	ENSOARG00000018249	13:66798217-66836462	Ghezel	Zel	OK	10.516	3.69456	-1.50911	-2.78169	0.00025	0.0198855	yes
XLOC_026773	XLOC_026773	ANKIB1	13:66798217-66836463	Ghezel	Zel	OK	6.27778	2.21212	-1.50483	-2.17132	0.00075	0.0400769	yes
XLOC_032046	XLOC_032046	SEL1L	13:66798217-66836464	Ghezel	Zel	OK	26.7216	9.52767	-1.48781	-2.26167	0.0005	0.0310119	yes
XLOC_031881	XLOC_031881	BLOC1S6	13:66798217-66836465	Ghezel	Zel	OK	14.3039	5.10277	-1.48705	-2.15521	0.0008	0.0418894	yes
XLOC_012300	XLOC_012300	MSMO1	13:66798217-66836466	Ghezel	Zel	OK	29.3274	10.4817	-1.48438	-2.889	0.00085	0.0435233	yes
XLOC_015722	XLOC_015722	SLC40A1	13:66798217-66836467	Ghezel	Zel	OK	83.5377	29.8732	-1.48358	-2.09509	0.00055	0.0331272	yes
XLOC_007871	XLOC_007871	PIP4K2A	13:66798217-66836468	Ghezel	Zel	OK	17.0527	6.10527	-1.48187	-2.30247	0.00035	0.0249795	yes
XLOC_030923	XLOC_030923	ERO1A	13:66798217-66836469	Ghezel	Zel	OK	8.11314	2.91328	-1.47762	-3.01822	0.001	0.047908	yes
XLOC_029988	XLOC_029988	TMEM33	13:66798217-66836470	Ghezel	Zel	OK	8.9613	3.23124	-1.47162	-3.11013	0.00035	0.0249795	yes
XLOC_006313	XLOC_006313	SUCO	13:66798217-66836471	Ghezel	Zel	OK	10.079	3.63729	-1.47041	-2.61602	0.0006	0.0350252	yes
XLOC_000751	XLOC_000751	TMEM50B	13:66798217-66836472	Ghezel	Zel	OK	24.093	8.76497	-1.4588	-2.81196	0.00075	0.0400769	yes
XLOC_002321	XLOC_002321	KPNA1	13:66798217-66836473	Ghezel	Zel	OK	12.4995	4.55755	-1.45553	-2.45898	0.00075	0.0400769	yes
XLOC_033779	XLOC_033779	LYPLA1	13:66798217-66836474	Ghezel	Zel	OK	48.6377	17.7841	-1.45149	-2.22818	0.00065	0.0369101	yes
XLOC_018837	XLOC_018837	MRS2	13:66798217-66836475	Ghezel	Zel	OK	11.4479	4.1902	-1.44999	-2.58277	0.00085	0.0435233	yes
XLOC_032404	XLOC_032404	SENP6	13:66798217-66836476	Ghezel	Zel	OK	28.5619	10.5256	-1.44019	-2.82822	0.00095	0.0463653	yes
XLOC_022402	XLOC_022402	TSNAX-DISC1	13:66798217-66836477	Ghezel	Zel	OK	19.082	7.03979	-1.4386	-2.74671	0.00105	0.0495068	yes
XLOC_019104	XLOC_019104	SLC36A4	13:66798217-66836478	Ghezel	Zel	OK	10.6295	3.93756	-1.4327	-2.71107	0.001	0.047908	yes
XLOC_018869	XLOC_018869	FAM8A1	13:66798217-66836479	Ghezel	Zel	OK	19.6955	7.31932	-1.42809	-2.73976	0.001	0.047908	yes
XLOC_014372	XLOC_014372	EMC3	13:66798217-66836480	Ghezel	Zel	OK	67.8874	25.2631	-1.42611	-1.82875	0.00065	0.0369101	yes
XLOC_007851	XLOC_007851	ACBD5	13:66798217-66836481	Ghezel	Zel	OK	29.2025	10.9613	-1.41368	-2.29899	0.0006	0.0350252	yes
XLOC_030481	XLOC_030481	GRSF1	13:66798217-66836482	Ghezel	Zel	OK	32.1357	12.1286	-1.40576	-2.61997	0.0009	0.0448708	yes
XLOC_014283	XLOC_014283	STT3B	13:66798217-66836483	Ghezel	Zel	OK	38.3836	14.6491	-1.38968	-2.3814	0.0009	0.0448708	yes
XLOC_013443	XLOC_013443	ARHGAP5	13:66798217-66836484	Ghezel	Zel	OK	7.18614	2.75128	-1.38512	-3.05322	0.00075	0.0400769	yes
XLOC_036053	XLOC_036053	AR	13:66798217-66836485	Ghezel	Zel	OK	4.94824	1.90454	-1.37747	-1.95494	0.00095	0.0463653	yes
XLOC_026964	XLOC_026964	FKBP14	13:66798217-66836486	Ghezel	Zel	OK	27.4777	10.6229	-1.37108	-2.55432	0.0009	0.0448708	yes
XLOC_031518	XLOC_031518	CLPX	13:66798217-66836487	Ghezel	Zel	OK	22.3599	8.74375	-1.35459	-2.44335	0.00095	0.0463653	yes
XLOC_026831	XLOC_026831	IL6	13:66798217-66836488	Ghezel	Zel	OK	0.299786	37.8733	6.98111	4.09954	0.0002	0.0170122	yes
XLOC_025573	XLOC_025573	ENSOARG00000017834	13:66798217-66836489	Ghezel	Zel	OK	0.408066	32.181	6.30126	1.76282	0.0006	0.0350252	yes
XLOC_020900	XLOC_020900	LIPG	13:66798217-66836490	Ghezel	Zel	OK	0.662987	33.4501	5.65689	3.68121	0.0001	0.010266	yes
XLOC_017354	XLOC_017354	ENSOARG00000018812	13:66798217-66836491	Ghezel	Zel	OK	0.378357	16.1958	5.41973	2.69903	0.0005	0.0310119	yes
XLOC_031721	XLOC_031721	SCG5	13:66798217-66836492	Ghezel	Zel	OK	0.703578	10.1937	3.85682	1.94364	0.00045	0.0293062	yes
XLOC_019190	XLOC_019190	ENSOARG00000009963	13:66798217-66836493	Ghezel	Zel	OK	4.23087	51.9551	3.61824	3.8647	5e-05	0.00554255	yes
XLOC_015428	XLOC_015428	STC1	13:66798217-66836494	Ghezel	Zel	OK	2.93917	34.6468	3.55924	3.68606	5e-05	0.00554255	yes
XLOC_015383	XLOC_015383	CCL19	13:66798217-66836495	Ghezel	Zel	OK	1.75127	18.9892	3.4387	2.61653	0.00015	0.0135325	yes
XLOC_016536	XLOC_016536	NR4A3	13:66798217-66836496	Ghezel	Zel	OK	0.218521	2.29858	3.3949	3.29735	0.0006	0.0350252	yes
XLOC_004947	XLOC_004947	SOCS3	13:66798217-66836497	Ghezel	Zel	OK	4.71125	48.4438	3.36213	3.40664	5e-05	0.00554255	yes
XLOC_023918	XLOC_023918	DUSP2	13:66798217-66836498	Ghezel	Zel	OK	3.74235	34.8909	3.22084	3.40401	5e-05	0.00554255	yes
XLOC_029074	XLOC_029074	GADD45B	13:66798217-66836499	Ghezel	Zel	OK	2.36262	21.933	3.21464	3.07566	5e-05	0.00554255	yes
XLOC_035529	XLOC_035529	ENSOARG00000017609	13:66798217-66836500	Ghezel	Zel	OK	19.3524	173.613	3.16529	3.70873	5e-05	0.00554255	yes
XLOC_024041	XLOC_024041	KRT8	13:66798217-66836501	Ghezel	Zel	OK	1.64801	14.2786	3.11506	2.33334	0.0005	0.0310119	yes
XLOC_027314	XLOC_027314	ENSOARG00000016081	13:66798217-66836502	Ghezel	Zel	OK	3.12489	26.2211	3.06885	2.16452	5e-05	0.00554255	yes
XLOC_025318	XLOC_025318	ARID5A	13:66798217-66836503	Ghezel	Zel	OK	4.1265	34.5622	3.06621	3.22628	5e-05	0.00554255	yes
XLOC_009721	XLOC_009721	SERTAD1	13:66798217-66836504	Ghezel	Zel	OK	16.1469	134.18	3.05484	4.13076	5e-05	0.00554255	yes
XLOC_015436	XLOC_015436	EGR3	13:66798217-66836505	Ghezel	Zel	OK	0.730971	5.80598	2.98965	2.46148	0.00015	0.0135325	yes
XLOC_002656	XLOC_002656	ENSOARG00000011235	13:66798217-66836506	Ghezel	Zel	OK	6.97825	51.2494	2.8766	2.99592	5e-05	0.00554255	yes
XLOC_002103	XLOC_002103	MPZ	13:66798217-66836507	Ghezel	Zel	OK	1.70378	12.3096	2.85297	2.38967	5e-05	0.00554255	yes
XLOC_000655	XLOC_000655	ACKR1	13:66798217-66836508	Ghezel	Zel	OK	4.65486	32.7723	2.81567	2.88651	5e-05	0.00554255	yes
XLOC_014483	XLOC_014483	TNNC1	13:66798217-66836509	Ghezel	Zel	OK	17.6885	121.191	2.7764	2.56783	0.00045	0.0293062	yes
XLOC_019357	XLOC_019357	ENSOARG00000014265	13:66798217-66836510	Ghezel	Zel	OK	11.1439	76.1928	2.7734	3.53311	5e-05	0.00554255	yes
XLOC_013977	XLOC_013977	ENSOARG00000014413	13:66798217-66836511	Ghezel	Zel	OK	182.287	1239.22	2.76515	3.25783	5e-05	0.00554255	yes
XLOC_005694	XLOC_005694	ASPSCR1	13:66798217-66836512	Ghezel	Zel	OK	45.7303	304.243	2.734	3.22026	0.0006	0.0350252	yes
XLOC_025465	XLOC_025465	NR4A1	13:66798217-66836513	Ghezel	Zel	OK	18.1988	116.767	2.68173	2.50218	5e-05	0.00554255	yes
XLOC_014883	XLOC_014883	KLHDC8B	13:66798217-66836514	Ghezel	Zel	OK	16.2555	99.9857	2.62079	3.5278	5e-05	0.00554255	yes
XLOC_008727	XLOC_008727	CDT1	13:66798217-66836515	Ghezel	Zel	OK	2.93449	17.8353	2.60356	2.82237	0.00015	0.0135325	yes
XLOC_001746	XLOC_001746	F3	13:66798217-66836516	Ghezel	Zel	OK	3.93709	23.5085	2.57798	2.07903	0.0004	0.0272418	yes
XLOC_000509	XLOC_000509	PLEKHO1	13:66798217-66836517	Ghezel	Zel	OK	28.3951	161.549	2.50826	3.42507	5e-05	0.00554255	yes
XLOC_005407	XLOC_005407	RNF112	13:66798217-66836518	Ghezel	Zel	OK	0.414432	2.31792	2.48362	2.09513	0.00075	0.0400769	yes
XLOC_021331	XLOC_021331	ENSOARG00000012750	13:66798217-66836519	Ghezel	Zel	OK	60.3867	335.298	2.47314	2.2202	5e-05	0.00554255	yes
XLOC_021761	XLOC_021761	ENSOARG00000013325	13:66798217-66836520	Ghezel	Zel	OK	24.9178	129.885	2.38199	3.10168	5e-05	0.00554255	yes
XLOC_014057	XLOC_014057	NUDT14	13:66798217-66836521	Ghezel	Zel	OK	49.8647	259.209	2.37802	2.11956	0.0009	0.0448708	yes
XLOC_006961	XLOC_006961	ATF3	13:66798217-66836522	Ghezel	Zel	OK	10.6849	55.2852	2.37132	2.70067	5e-05	0.00554255	yes
XLOC_025886	XLOC_025886	LAG3	13:66798217-66836523	Ghezel	Zel	OK	0.390381	2.0095	2.36388	2.12935	0.0009	0.0448708	yes
XLOC_028928	XLOC_028928	JUNB	13:66798217-66836524	Ghezel	Zel	OK	50.3219	254.976	2.3411	2.38244	0.0001	0.010266	yes
XLOC_015496	XLOC_015496	TPM2	13:66798217-66836525	Ghezel	Zel	OK	59.1774	291.85	2.30211	2.90946	5e-05	0.00554255	yes
XLOC_034825	XLOC_034825	IGHM	13:66798217-66836526	Ghezel	Zel	OK	1.79224	8.78935	2.29399	2.39773	0.0002	0.0170122	yes
XLOC_032951	XLOC_032951	SF3B5	13:66798217-66836527	Ghezel	Zel	OK	68.9486	319.309	2.21136	2.77809	0.00025	0.0198855	yes
XLOC_001967	XLOC_001967	S100A4	13:66798217-66836528	Ghezel	Zel	OK	763.82	3506.13	2.19857	1.95882	0.00105	0.0495068	yes
XLOC_004517	XLOC_004517	SERPINF2	13:66798217-66836529	Ghezel	Zel	OK	1.47779	6.77983	2.1978	1.97693	0.00075	0.0400769	yes
XLOC_028205	XLOC_028205	ENSOARG00000014981	13:66798217-66836530	Ghezel	Zel	OK	6.81065	30.6031	2.16781	2.86382	5e-05	0.00554255	yes
XLOC_010451	XLOC_010451	LAYN	13:66798217-66836531	Ghezel	Zel	OK	29.1003	128.203	2.13932	2.48706	0.00015	0.0135325	yes
XLOC_010451	XLOC_010451	C11orf88	13:66798217-66836531	Ghezel	Zel	OK	29.1003	128.203	2.13932	2.48706	0.00015	0.0135325	yes
XLOC_006862	XLOC_006862	PLEKHM2	13:66798217-66836532	Ghezel	Zel	OK	45.0683	195.191	2.1147	2.43101	5e-05	0.00554255	yes
XLOC_019375	XLOC_019375	FOSL1	13:66798217-66836533	Ghezel	Zel	OK	8.12932	34.5637	2.08805	2.39447	5e-05	0.00554255	yes
XLOC_024609	XLOC_024609	MAFF	13:66798217-66836534	Ghezel	Zel	OK	18.6613	79.1578	2.08468	1.98599	0.00055	0.0331272	yes
XLOC_034631	XLOC_034631	ENSOARG00000002553	13:66798217-66836535	Ghezel	Zel	OK	43.0931	179.761	2.06055	3.1813	5e-05	0.00554255	yes
XLOC_001219	XLOC_001219	RBP1	13:66798217-66836536	Ghezel	Zel	OK	31.0495	128.892	2.05351	2.31592	0.00065	0.0369101	yes
XLOC_001219	XLOC_001219	NMNAT3	13:66798217-66836536	Ghezel	Zel	OK	31.0495	128.892	2.05351	2.31592	0.00065	0.0369101	yes
XLOC_010815	XLOC_010815	CREB3L1	13:66798217-66836537	Ghezel	Zel	OK	6.74407	27.96	2.05167	1.72135	0.00045	0.0293062	yes
XLOC_012039	XLOC_012039	PTGER4	13:66798217-66836538	Ghezel	Zel	OK	2.96753	11.5874	1.96522	2.42879	5e-05	0.00554255	yes
XLOC_009155	XLOC_009155	ENSOARG00000012344	13:66798217-66836539	Ghezel	Zel	OK	20.652	79.6326	1.94708	2.59603	5e-05	0.00554255	yes
XLOC_011355	XLOC_011355	PACSIN3	13:66798217-66836540	Ghezel	Zel	OK	7.01504	26.933	1.94085	2.63877	0.0001	0.010266	yes
XLOC_029216	XLOC_029216	ENSOARG00000008521	13:66798217-66836541	Ghezel	Zel	OK	2.93175	10.8666	1.89007	2.34053	0.0003	0.0228175	yes
XLOC_005396	XLOC_005396	TRPV2	13:66798217-66836542	Ghezel	Zel	OK	3.65615	13.464	1.88071	2.04895	0.0003	0.0228175	yes
XLOC_015320	XLOC_015320	GADD45G	13:66798217-66836543	Ghezel	Zel	OK	39.9105	146.211	1.87321	2.18605	0.0005	0.0310119	yes
XLOC_022764	XLOC_022764	ARHGAP22	13:66798217-66836544	Ghezel	Zel	OK	11.9003	43.5599	1.87201	2.81138	0.0003	0.0228175	yes
XLOC_000311	XLOC_000311	CYR61	13:66798217-66836545	Ghezel	Zel	OK	50.7872	184.862	1.86391	2.14221	0.00015	0.0135325	yes
XLOC_021976	XLOC_021976	PAGR1	13:66798217-66836546	Ghezel	Zel	OK	31.7184	113.689	1.8417	2.31155	0.0003	0.0228175	yes
XLOC_025467	XLOC_025467	ENSOARG00000017224	13:66798217-66836547	Ghezel	Zel	OK	13.6879	48.8879	1.83658	2.41425	0.00025	0.0198855	yes
XLOC_007954	XLOC_007954	THBD	13:66798217-66836548	Ghezel	Zel	OK	6.24186	21.0674	1.75496	2.16087	0.0005	0.0310119	yes
XLOC_000140	XLOC_000140	DMAP1	13:66798217-66836549	Ghezel	Zel	OK	25.8522	87.1024	1.75243	2.33449	0.0008	0.0418894	yes
XLOC_028984	XLOC_028984	ACP5	13:66798217-66836550	Ghezel	Zel	OK	37.0315	121.186	1.7104	2.51035	5e-05	0.00554255	yes
XLOC_013699	XLOC_013699	ENSOARG00000026481	13:66798217-66836551	Ghezel	Zel	OK	16.8474	55.1157	1.70994	2.27053	0.00015	0.0135325	yes
XLOC_016174	XLOC_016174	COL16A1	13:66798217-66836552	Ghezel	Zel	OK	7.70455	25.1821	1.70861	2.00812	0.00085	0.0435233	yes
XLOC_017265	XLOC_017265	FAM110D	13:66798217-66836553	Ghezel	Zel	OK	11.6874	38.1545	1.7069	2.22626	0.0005	0.0310119	yes
XLOC_030222	XLOC_030222	ENSOARG00000016282	13:66798217-66836554	Ghezel	Zel	OK	16.366	52.9906	1.69503	2.74944	5e-05	0.00554255	yes
XLOC_027663	XLOC_027663	WDR91	13:66798217-66836555	Ghezel	Zel	OK	7.2122	22.8578	1.66418	2.1186	0.00045	0.0293062	yes
XLOC_025199	XLOC_025199	PKDCC	13:66798217-66836556	Ghezel	Zel	OK	11.0607	34.9279	1.65893	2.15825	0.0004	0.0272418	yes
XLOC_000518	XLOC_000518	ECM1	13:66798217-66836557	Ghezel	Zel	OK	20.086	63.2864	1.65571	2.07168	0.00075	0.0400769	yes
XLOC_036697	XLOC_036697	TIMP1	13:66798217-66836558	Ghezel	Zel	OK	30.6638	96.5621	1.65492	2.15959	0.00015	0.0135325	yes
XLOC_019812	XLOC_019812	ENSOARG00000010956	13:66798217-66836559	Ghezel	Zel	OK	75.7265	236.999	1.64601	2.11519	0.00095	0.0463653	yes
XLOC_025898	XLOC_025898	PLEKHG6	13:66798217-66836560	Ghezel	Zel	OK	29.9862	93.7595	1.64467	2.25528	0.0005	0.0310119	yes
XLOC_018153	XLOC_018153	MDFI	13:66798217-66836561	Ghezel	Zel	OK	46.4965	136.923	1.55817	2.52666	0.00085	0.0435233	yes
XLOC_004744	XLOC_004744	CISD3	13:66798217-66836562	Ghezel	Zel	OK	84.8979	246.435	1.53741	2.20003	0.0004	0.0272418	yes
XLOC_025857	XLOC_025857	SLC2A3	13:66798217-66836563	Ghezel	Zel	OK	12.8026	34.8159	1.44331	2.06059	0.0009	0.0448708	yes
