# Supplementary material for: Molecular mechanisms of fat deposition: &lt;i&gt;IL-6&lt;/i&gt; is a hub gene in fat lipolysis, comparing thin-tailed with fat-tailed sheep breeds
Source: Copernicus journal article supplement (doi:10.5194/aab-64-53-2021), 2021-02-17
Supplement: Supplementary file 2 [file S2.xlsx]

## Sheet: Cellular_Component
Term	P-value	Adjusted P-value	Old P-value	Old Adjusted P-value	Odds Ratio	Combined Score	Genes
extracellular exosome (GO:0005759)	2.57214e-06	0.00114717	0	0	6.67267	85.8825	ALDH6A1;ALAS1;SUCLA2;ACSM3;TFAM;AK4;BCO2;ACADSB;CBR4;PDK1
mitochondrion (GO:0005739)	3.26714e-05	0.00728573	0	0	3.21224	33.1792	STARD4;ALAS1;OXSM;AK4;IDE;ACADSB;SLC25A16;ALDH6A1;SUCLA2;ME1;CYP1B1;TFAM;L2HGDH;BCO2;SLC25A36;PDK1
peroxisome (GO:0005777)	3.40278e-05	0.0050588	0	0	13.5648	139.56	GRHPR;ABCD2;EHHADH;HACL1;IDE
extracellular matrix (GO:0005782)	5.54927e-05	0.00618744	0	0	19.1801	187.95	GRHPR;EHHADH;HACL1;IDE
microbody lumen (GO:0031907)	5.54927e-05	0.00494995	0	0	19.1801	187.95	GRHPR;EHHADH;HACL1;IDE
microbody (GO:0042579)	8.97053e-05	0.00666809	0	0	11.0852	103.303	IDI1;ABCD2;EHHADH;HACL1;IDE
peroxisomal part (GO:0044439)	8.97053e-05	0.00571551	0	0	11.0852	103.303	IDI1;ABCD2;EHHADH;HACL1;IDE
lysosome (GO:0005764)	0.00104967	0.0585193	0	0	3.89949	26.7477	ENPEP;SLC11A1;VMA21;SPPL2A;SDC1;IDS;TLR7;PCYOX1
phagocytic vesicle (GO:0045335)	0.00793454	0.393201	0	0	7.36377	35.6151	SLC11A1;TLR7;LTF
lytic vacuole (GO:0000323)	0.0123745	0.551903	0	0	4.48229	19.6868	SLC11A1;VMA21;TLR7;PCYOX1
integral component of endoplasmic reticulum membrane (GO:0030176)	0.0249123	1	0	0	4.79501	17.7051	SPPL2A;TECR;RETREG1
membrane attack complex (GO:0005579)	0.0287528	1	0	0	34.3643	121.959	C7
integral component of cytoplasmic side of endoplasmic reticulum membrane (GO:0071458)	0.0287528	0.986442	0	0	34.3643	121.959	SPPL2A
Golgi trans cisterna (GO:0000138)	0.0334648	1	0	0	29.4551	100.067	YIPF6
messenger ribonucleoprotein complex (GO:1990124)	0.0334648	0.995019	0	0	29.4551	100.067	CPEB2
early phagosome (GO:0032009)	0.0334648	0.93283	0	0	29.4551	100.067	TLR7
autolysosome (GO:0044754)	0.0381541	1	0	0	25.7732	84.1784	FTL
Golgi medial cisterna (GO:0005797)	0.0381541	0.945373	0	0	25.7732	84.1784	YIPF6
vacuolar lumen (GO:0005775)	0.0442777	1	0	0	3.81825	11.9025	SDC1;IDS;FTL
integral component of plasma membrane (GO:0005887)	0.0506052	1	0	0	1.69005	5.04259	GHR;ENPEP;SLC15A2;C7;SLC2A10;MMD;SLC11A1;TNFRSF9;SLC16A7;SDC1;TNFRSF11B;ROBO1
lysosomal membrane (GO:0005765)	0.0537884	1	0	0	2.82446	8.25504	ENPEP;VNN1;SPPL2A;TLR7
secondary lysosome (GO:0005767)	0.0612651	1	0	0	15.8604	44.291	FTL
lysosomal lumen (GO:0043202)	0.0667898	1	0	0	4.7399	12.8271	IDS;SDC1
secretory granule lumen (GO:0034774)	0.0690663	1	0	0	2.59353	6.93169	S100A9;KNG1;FTL;LTF
endolysosome membrane (GO:0036020)	0.0703548	1	0	0	13.7457	36.4839	TLR7
very-low-density lipoprotein particle (GO:0034361)	0.0703548	1	0	0	13.7457	36.4839	PCYOX1
axonemal dynein complex (GO:0005858)	0.074867	1	0	0	12.8866	33.4026	DNHD1
Golgi lumen (GO:0005796)	0.08348	1	0	0	4.16536	10.3432	IMPAD1;SDC1
endocytic vesicle lumen (GO:0071682)	0.0838264	1	0	0	11.4548	28.3964	LTF
endolysosome (GO:0036019)	0.0971047	1	0	0	9.81836	22.8961	TLR7
intrinsic component of mitochondrial inner membrane (GO:0031304)	0.135807	1	0	0	6.87285	13.7218	L2HGDH
integral component of lumenal side of endoplasmic reticulum membrane (GO:0071556)	0.135807	1	0	0	6.87285	13.7218	SPPL2A
nucleoplasm part (GO:0044451)	0.136724	1	0	0	2.02143	4.02222	NMNAT1;IMPAD1;HIF1A;RETREG1
late endosome (GO:0005770)	0.149549	1	0	0	2.92462	5.55716	SLC11A1;SPPL2A
integral component of mitochondrial inner membrane (GO:0031305)	0.152477	1	0	0	6.06428	11.4053	L2HGDH
phagocytic vesicle membrane (GO:0030670)	0.172868	1	0	0	5.28681	9.27956	SLC11A1
azurophil granule (GO:0042582)	0.17341	1	0	0	2.66046	4.66137	VNN1;FTL
peroxisomal membrane (GO:0005778)	0.180887	1	0	0	5.02892	8.59885	ABCD2
nuclear body (GO:0016604)	0.182002	1	0	0	1.66547	2.83753	NMNAT1;IMPAD1;NAMPT;HIF1A;RETREG1
tertiary granule (GO:0070820)	0.190813	1	0	0	2.49922	4.13986	SLC11A1;LTF
Golgi subcompartment (GO:0098791)	0.204323	1	0	0	1.71821	2.72861	GALNT13;CCDC91;YIPF6;TLR7
cis-Golgi network (GO:0005801)	0.208354	1	0	0	4.29553	6.73761	RETREG1
late endosome membrane (GO:0031902)	0.212203	1	0	0	4.20787	6.52309	SLC11A1
Golgi cisterna (GO:0031985)	0.219845	1	0	0	4.04285	6.12425	YIPF6
trans-Golgi network (GO:0005802)	0.228018	1	0	0	2.21705	3.27753	CCDC91;YIPF6
mitochondrial inner membrane (GO:0005743)	0.230903	1	0	0	1.80865	2.65104	SLC25A16;L2HGDH;SLC25A36
tertiary granule lumen (GO:1904724)	0.23863	1	0	0	3.68189	5.27555	LTF
integral component of mitochondrial membrane (GO:0032592)	0.242333	1	0	0	3.61729	5.1273	L2HGDH
azurophil granule membrane (GO:0035577)	0.249686	1	0	0	3.49467	4.84904	VNN1
ficolin-1-rich granule membrane (GO:0101003)	0.260583	1	0	0	3.32557	4.47235	SLC11A1
specific granule lumen (GO:0035580)	0.26418	1	0	0	3.27279	4.35649	LTF
lipid droplet (GO:0005811)	0.271323	1	0	0	3.17209	4.13782	PNPLA3
autophagosome (GO:0005776)	0.271323	1	0	0	3.17209	4.13782	FTL
cytoplasmic vesicle (GO:0031410)	0.281869	1	0	0	1.90913	2.41755	STARD4;ENPEP
platelet alpha granule lumen (GO:0031093)	0.281908	1	0	0	3.03214	3.83922	KNG1
nuclear transcription factor complex (GO:0044798)	0.295786	1	0	0	2.86369	3.48831	HIF1A
tertiary granule membrane (GO:0070821)	0.302625	1	0	0	2.78629	3.33034	SLC11A1
lytic vacuole membrane (GO:0098852)	0.314123	1	0	0	1.76227	2.04066	ENPEP;SPPL2A
ribonucleoprotein granule (GO:0035770)	0.326048	1	0	0	2.5455	2.85277	GHR
azurophil granule lumen (GO:0035578)	0.358165	1	0	0	2.26578	2.32641	FTL
platelet alpha granule (GO:0031091)	0.358165	1	0	0	2.26578	2.32641	KNG1
endoplasmic reticulum lumen (GO:0005788)	0.379267	1	0	0	1.52166	1.47528	POGLUT1;KNG1
nuclear speck (GO:0016607)	0.423528	1	0	0	1.38845	1.19287	NAMPT;HIF1A
cytoplasmic vesicle lumen (GO:0060205)	0.469579	1	0	0	1.58604	1.19892	S100A9
RNA polymerase II transcription factor complex (GO:0090575)	0.514322	1	0	0	1.39315	0.926311	HIF1A
specific granule (GO:0042581)	0.544292	1	0	0	1.28066	0.778983	LTF
cytoplasmic ribonucleoprotein granule (GO:0036464)	0.566094	1	0	0	1.20576	0.686073	GHR
ficolin-1-rich granule (GO:0101002)	0.594893	1	0	0	1.11452	0.578851	SLC11A1
Golgi membrane (GO:0000139)	0.636627	1	0	0	0.93086	0.42035	GALNT13;TLR7
nucleolus (GO:0005730)	0.64233	1	0	0	0.913673	0.40444	PIK3CB;RETREG1;PDK1
cytoskeleton (GO:0005856)	0.923202	1	0	0	0.39575	0.0316234	S100A9
