# Supplementary material for: Molecular mechanisms of fat deposition: &lt;i&gt;IL-6&lt;/i&gt; is a hub gene in fat lipolysis, comparing thin-tailed with fat-tailed sheep breeds
Source: Copernicus journal article supplement (doi:10.5194/aab-64-53-2021), 2021-02-17
Supplement: Supplementary file 3 [file S3.xlsx]

## Sheet: Molecular_Function
Term	P-value	Adjusted P-value	Old P-value	Old Adjusted P-value	Odds Ratio	Combined Score	Genes
NAD binding (GO:0004842)	0.000368737	0.424416	0	0	21.3295	168.619	MOGAT1;PNPLA3;MBOAT2
oligopeptide transporter activity (GO:0046872)	0.000450429	0.259222	0	0	19.9534	153.747	GRHPR;ME1;CBR4
RNA polymerase II core promoter proximal region sequence-specific DNA binding (GO:0035639)	0.00073202	0.280852	0	0	4.12371	29.772	ENPEP;GLO1;ME1;IDE;S100A9;KNG1;FTL;LTF
acylglycerol O-acyltransferase activity (GO:0016411)	0.000926084	0.266481	0	0	9.26677	64.7242	GRHPR;EHHADH;ME1;CBR4
NADP binding (GO:0050661)	0.00102141	0.235129	0	0	41.2371	283.982	GRHPR;CBR4
transition metal ion binding (GO:0046914)	0.00102141	0.195941	0	0	41.2371	283.982	FASN;OXSM
oxidoreductase activity, acting on the CH-OH group of donors, NAD or NADP as acceptor (GO:0016616)	0.00126799	0.208493	0	0	14.0581	93.7721	GOLT1B;PNPLA3;DDHD1
NADPH binding (GO:0070402)	0.00267262	0.384523	0	0	25.7732	152.698	NT5DC1;IMPAD1
fatty acid synthase activity (GO:0004312)	0.00417861	0.534397	0	0	20.6186	112.944	PNPLA3;MBOAT2
lipase activity (GO:0016298)	0.00460393	0.529912	0	0	19.6367	105.662	SLC15A2;SLC2A10
nucleotidase activity (GO:0008252)	0.0050484	0.528246	0	0	18.7441	99.1319	GRHPR;ME1
lysophosphatidic acid acyltransferase activity (GO:0042171)	0.00649475	0.622954	0	0	16.4948	83.0806	TNFRSF9;TNFRSF11B
solute:proton symporter activity (GO:0015295)	0.00649475	0.575035	0	0	16.4948	83.0806	TNFRSF9;TNFRSF11B
NAD binding (GO:0051287)	0.0105044	0.863613	0	0	12.8866	58.7108	PNPLA3;MBOAT2
death receptor activity (GO:0005035)	0.0160571	1	0	0	3.4024	14.0574	ENPEP;GLO1;IDE;S100A9;KNG1
tumor necrosis factor-activated receptor activity (GO:0005031)	0.0161101	1	0	0	10.3093	42.5599	SCPEP1;FOLH1
O-acyltransferase activity (GO:0008374)	0.0176723	1	0	0	9.81836	39.6245	CYP4F2;MSMO1
zinc ion binding (GO:0008270)	0.0192959	1	0	0	9.37207	36.9996	FGF7;PIK3CB
carboxypeptidase activity (GO:0004180)	0.0209799	1	0	0	8.96459	34.6409	ENPEP;FOLH1
oxidoreductase activity, acting on paired donors, with incorporation or reduction of molecular oxygen, NAD(P)H as one donor, and incorporation of one atom of oxygen (GO:0016709)	0.0263804	1	0	0	7.93021	28.8274	FGF7;PIK3CB
1-phosphatidylinositol-3-kinase activity (GO:0016303)	0.0263804	1	0	0	7.93021	28.8274	KNG1;LTF
exopeptidase activity (GO:0008238)	0.0287528	1	0	0	34.3643	121.959	ME1
phosphatidylinositol kinase activity (GO:0052742)	0.0287528	1	0	0	34.3643	121.959	POGLUT1
cysteine-type endopeptidase inhibitor activity (GO:0004869)	0.0287528	1	0	0	34.3643	121.959	IDE
malate dehydrogenase activity (GO:0016615)	0.0287528	1	0	0	34.3643	121.959	SPPL2A
glucosyltransferase activity (GO:0046527)	0.0287528	1	0	0	34.3643	121.959	SLC11A1
ubiquitin-dependent protein binding (GO:0140036)	0.0287528	1	0	0	34.3643	121.959	SLC11A1
aspartic endopeptidase activity, intramembrane cleaving (GO:0042500)	0.0292691	1	0	0	7.49766	26.4759	FTL;LTF
manganese ion transmembrane transporter activity (GO:0005384)	0.0292691	1	0	0	7.49766	26.4759	ENPEP;FOLH1
solute:proton antiporter activity (GO:0015299)	0.0312619	1	0	0	7.23458	25.0704	FASN;ZDHHC2
iron ion binding (GO:0005506)	0.0334648	1	0	0	29.4551	100.067	SLC11A1
metalloexopeptidase activity (GO:0008235)	0.0334648	1	0	0	29.4551	100.067	CYP4F2
transferase activity, transferring acyl groups other than amino-acyl groups (GO:0016747)	0.0334648	1	0	0	29.4551	100.067	POGLUT1
cation:cation antiporter activity (GO:0015491)	0.0334648	1	0	0	29.4551	100.067	ABCD2
oxidoreductase activity, acting on paired donors, with incorporation or reduction of molecular oxygen, reduced iron-sulfur protein as one donor, and incorporation of one atom of oxygen (GO:0016713)	0.0334648	1	0	0	29.4551	100.067	ACSM3
xylosyltransferase activity (GO:0042285)	0.0334648	1	0	0	29.4551	100.067	PIK3CB
fatty acid transporter activity (GO:0015245)	0.0334648	1	0	0	29.4551	100.067	AK4
fatty-acyl-CoA synthase activity (GO:0004321)	0.0334648	1	0	0	29.4551	100.067	SLC2A10
1-phosphatidylinositol-4-phosphate 3-kinase activity (GO:0035005)	0.0356219	1	0	0	3.23428	10.7857	MMD;PIK3CB;PRKG1;PDK1
adenylate kinase activity (GO:0004017)	0.0381541	1	0	0	25.7732	84.1784	LTF
cation:sugar symporter activity (GO:0005402)	0.0381541	1	0	0	25.7732	84.1784	ACSM3
phosphotransferase activity, alcohol group as acceptor (GO:0016773)	0.0381541	1	0	0	25.7732	84.1784	PRKG1
signal recognition particle binding (GO:0005047)	0.0381541	1	0	0	25.7732	84.1784	EHHADH
acyl-CoA ligase activity (GO:0003996)	0.0381541	0.998076	0	0	25.7732	84.1784	PNPLA3
cyclic nucleotide-dependent protein kinase activity (GO:0004690)	0.0381541	0.975896	0	0	25.7732	84.1784	EHHADH
3-hydroxyacyl-CoA dehydrogenase activity (GO:0003857)	0.0419855	1	0	0	6.15479	19.5134	SLC25A16;SLC16A7
lipoprotein lipase activity (GO:0004465)	0.0428209	1	0	0	22.9095	72.1817	SCPEP1
enoyl-CoA hydratase activity (GO:0004300)	0.0428209	1	0	0	22.9095	72.1817	S100A9
secondary active transmembrane transporter activity (GO:0015291)	0.0428209	1	0	0	22.9095	72.1817	POGLUT1
serine-type exopeptidase activity (GO:0070008)	0.0428209	0.985737	0	0	22.9095	72.1817	S100A9
RAGE receptor binding (GO:0050786)	0.0428209	0.966409	0	0	22.9095	72.1817	SCPEP1
UDP-glucosyltransferase activity (GO:0035251)	0.0428209	0.947824	0	0	22.9095	72.1817	MBOAT2
Toll-like receptor binding (GO:0035325)	0.0428209	0.92994	0	0	22.9095	72.1817	TLR7
serine-type carboxypeptidase activity (GO:0004185)	0.0428209	0.912719	0	0	22.9095	72.1817	SLC2A10
2-acylglycerol-3-phosphate O-acyltransferase activity (GO:0047144)	0.0442741	0.926537	0	0	5.97639	18.6305	FGF7;PIK3CB
siRNA binding (GO:0035197)	0.0454355	0.933863	0	0	5.89102	18.2118	PNPLA3;DDHD1
D-glucose transmembrane transporter activity (GO:0055056)	0.0474653	0.958466	0	0	20.6186	62.8403	FOLH1
phosphatidylinositol-4,5-bisphosphate 3-kinase activity (GO:0046934)	0.0474653	0.94194	0	0	20.6186	62.8403	POGLUT1
phospholipase activity (GO:0004620)	0.0474653	0.925975	0	0	20.6186	62.8403	SLC25A16
dipeptidase activity (GO:0016805)	0.0474653	0.910542	0	0	20.6186	62.8403	SLC25A16
UDP-xylosyltransferase activity (GO:0035252)	0.0474653	0.895615	0	0	20.6186	62.8403	SLC2A10
adenine nucleotide transmembrane transporter activity (GO:0000295)	0.0477919	0.887234	0	0	5.72738	17.4164	FGF7;PIK3CB
ADP transmembrane transporter activity (GO:0015217)	0.0479456	0.875959	0	0	2.93503	8.91569	MMD;PIK3CB;PRKG1;PDK1
sugar:proton symporter activity (GO:0005351)	0.0500272	0.899707	0	0	2.89383	8.66758	EHF;TFEC;TFAM;HIF1A
phosphatidylinositol bisphosphate kinase activity (GO:0052813)	0.0520874	0.922347	0	0	18.7441	55.3858	IDI1
kinase activity (GO:0016301)	0.0520874	0.908372	0	0	18.7441	55.3858	CPEB2
transcriptional activator activity, RNA polymerase II transcription regulatory region sequence-specific binding (GO:0001228)	0.0520874	0.894814	0	0	18.7441	55.3858	CPEB2
intramolecular oxidoreductase activity, transposing C=C bonds (GO:0016863)	0.0538721	0.911865	0	0	5.35547	15.6441	FGF7;PIK3CB
ribosomal large subunit binding (GO:0043023)	0.0542147	0.904363	0	0	3.51453	10.2442	EHF;TFEC;TFAM
mRNA 3'-UTR AU-rich region binding (GO:0035925)	0.0566873	0.932101	0	0	17.1821	49.3162	ACSM3
phosphatidylinositol 3-kinase activity (GO:0035004)	0.0566873	0.918972	0	0	17.1821	49.3162	ACSM3
transcriptional activator activity, RNA polymerase II core promoter proximal region sequence-specific binding (GO:0001077)	0.0612651	0.97939	0	0	15.8604	44.291	SLC2A10
C-acyltransferase activity (GO:0016408)	0.0612651	0.965974	0	0	15.8604	44.291	CPEB2
CoA-ligase activity (GO:0016405)	0.0658209	1	0	0	14.7275	40.071	SLC15A2
hexose transmembrane transporter activity (GO:0015149)	0.0658209	1	0	0	14.7275	40.071	ROBO1
GTPase inhibitor activity (GO:0005095)	0.0658209	0.99684	0	0	14.7275	40.071	NT5DC1
peptide transmembrane transporter activity (GO:1904680)	0.0703548	1	0	0	13.7457	36.4839	PIK3CB
LRR domain binding (GO:0030275)	0.0703548	1	0	0	13.7457	36.4839	ACADSB
5'-nucleotidase activity (GO:0008253)	0.0703548	1	0	0	13.7457	36.4839	CPEB2
phosphatidylinositol phosphate kinase activity (GO:0016307)	0.074867	1	0	0	12.8866	33.4026	IDS
acyl-CoA dehydrogenase activity (GO:0003995)	0.074867	1	0	0	12.8866	33.4026	ACSM3
ribosomal small subunit binding (GO:0043024)	0.074867	1	0	0	12.8866	33.4026	CBR4
sulfuric ester hydrolase activity (GO:0008484)	0.0793575	1	0	0	12.1286	30.7313	DNHD1
acid-thiol ligase activity (GO:0016878)	0.0793575	1	0	0	12.1286	30.7313	TFAM
oxidoreductase activity, acting on NAD(P)H, quinone or similar compound as acceptor (GO:0016655)	0.0793575	1	0	0	12.1286	30.7313	CYP4F2
ATP-dependent microtubule motor activity, minus-end-directed (GO:0008569)	0.0793575	1	0	0	12.1286	30.7313	STARD4
DNA binding, bending (GO:0008301)	0.0793575	1	0	0	12.1286	30.7313	SLC25A16
arachidonic acid epoxygenase activity (GO:0008392)	0.0793575	1	0	0	12.1286	30.7313	ENPEP
cholesterol transporter activity (GO:0017127)	0.0793575	1	0	0	12.1286	30.7313	CYP4F2
antiporter activity (GO:0015297)	0.0838264	1	0	0	11.4548	28.3964	MBOAT2
metalloaminopeptidase activity (GO:0070006)	0.0838264	1	0	0	11.4548	28.3964	AK4
arachidonic acid monooxygenase activity (GO:0008391)	0.0838264	1	0	0	11.4548	28.3964	ACSM3
1-acylglycerol-3-phosphate O-acyltransferase activity (GO:0003841)	0.0893002	1	0	0	4.0036	9.67171	ENPEP;IDE
nucleoside diphosphate kinase activity (GO:0004550)	0.0926999	1	0	0	10.3093	24.5195	SLC2A10
fatty acid ligase activity (GO:0015645)	0.0926999	1	0	0	10.3093	24.5195	SLC25A16
metallopeptidase activity (GO:0008237)	0.0971047	1	0	0	9.81836	22.8961	CPEB2
glucose transmembrane transporter activity (GO:0005355)	0.0971047	1	0	0	9.81836	22.8961	GALNT13
organic cation transmembrane transporter activity (GO:0015101)	0.0971047	1	0	0	9.81836	22.8961	NMNAT1
AU-rich element binding (GO:0017091)	0.0971047	1	0	0	9.81836	22.8961	CYP1B1
polypeptide N-acetylgalactosaminyltransferase activity (GO:0004653)	0.0971047	1	0	0	9.81836	22.8961	SPPL2A
adenylyltransferase activity (GO:0070566)	0.101488	1	0	0	9.37207	21.4415	HIF1A
oxidoreductase activity, acting on paired donors, with incorporation or reduction of molecular oxygen, reduced flavin or flavoprotein as one donor, and incorporation of one atom of oxygen (GO:0016712)	0.101488	1	0	0	9.37207	21.4415	BCO2
aspartic-type endopeptidase activity (GO:0004190)	0.102813	1	0	0	3.68189	8.37572	KNG1;LTF
histone acetyltransferase binding (GO:0035035)	0.104311	1	0	0	1.86032	4.20503	GHR;GRHPR;ABCD2;SLC11A1;SPPL2A;IDE
oxidoreductase activity, acting on single donors with incorporation of molecular oxygen, incorporation of two atoms of oxygen (GO:0016702)	0.105851	1	0	0	8.96459	20.132	ME1
endopeptidase inhibitor activity (GO:0004866)	0.105851	1	0	0	8.96459	20.132	AK4
protein homodimerization activity (GO:0042803)	0.114513	1	0	0	8.24742	17.8727	CRABP2
ADP binding (GO:0043531)	0.114513	1	0	0	8.24742	17.8727	ZDHHC2
nucleotide kinase activity (GO:0019201)	0.114513	1	0	0	8.24742	17.8727	ZDHHC2
retinoid binding (GO:0005501)	0.118813	1	0	0	7.93021	16.893	ALDH6A1
protein-cysteine S-palmitoyltransferase activity (GO:0019706)	0.118813	1	0	0	7.93021	16.893	PNPLA3
protein-cysteine S-acyltransferase activity (GO:0019707)	0.118813	1	0	0	7.93021	16.893	SLC11A1
oxidoreductase activity, acting on the aldehyde or oxo group of donors, NAD or NADP as acceptor (GO:0016620)	0.123093	1	0	0	7.6365	15.9971	PRKG1
triglyceride lipase activity (GO:0004806)	0.13159	1	0	0	7.10985	14.4193	STARD4
metal ion transmembrane transporter activity (GO:0046873)	0.13159	1	0	0	7.10985	14.4193	FOLH1
calcium channel regulator activity (GO:0005246)	0.13159	1	0	0	7.10985	14.4193	ZDHHC2
sterol transporter activity (GO:0015248)	0.135788	1	0	0	2.35193	4.696	EHF;TFEC;TFAM
metallocarboxypeptidase activity (GO:0004181)	0.135807	1	0	0	6.87285	13.7218	RNF14
palmitoyltransferase activity (GO:0016409)	0.140005	1	0	0	6.65115	13.0767	AK4
RNA polymerase II core promoter proximal region sequence-specific DNA binding (GO:0000978)	0.140005	1	0	0	6.65115	13.0767	PNPLA3
ubiquitin conjugating enzyme binding (GO:0031624)	0.140005	1	0	0	6.65115	13.0767	HIF1A
nucleobase-containing compound kinase activity (GO:0019205)	0.144183	1	0	0	6.4433	12.4786	LTF
phospholipase A2 activity (GO:0004623)	0.14834	1	0	0	6.24805	11.9228	SLC16A7
Hsp90 protein binding (GO:0051879)	0.14834	1	0	0	6.24805	11.9228	SLC11A1
protein serine/threonine kinase activator activity (GO:0043539)	0.153831	1	0	0	2.21705	4.15009	EHF;TFEC;TFAM
monocarboxylic acid transmembrane transporter activity (GO:0008028)	0.156139	1	0	0	2.20127	4.08778	EHF;TFEC;TFAM
transition metal ion transmembrane transporter activity (GO:0046915)	0.156595	1	0	0	5.89102	10.9225	ENPEP
core promoter proximal region sequence-specific DNA binding (GO:0000987)	0.160692	1	0	0	5.72738	10.4712	ME1
transcription factor activity, RNA polymerase II core promoter proximal region sequence-specific binding (GO:0000982)	0.160692	1	0	0	5.72738	10.4712	RNF14
aminopeptidase activity (GO:0004177)	0.16477	1	0	0	5.57258	10.0485	KNG1
manganese ion binding (GO:0030145)	0.16477	1	0	0	5.57258	10.0485	KNG1
ubiquitin-like protein conjugating enzyme binding (GO:0044390)	0.172868	1	0	0	5.28681	9.27956	CPEB2
endopeptidase regulator activity (GO:0061135)	0.180887	1	0	0	5.02892	8.59885	HIF1A
peptidase inhibitor activity (GO:0030414)	0.184868	1	0	0	4.90918	8.28725	AK4
ribosome binding (GO:0043022)	0.18883	1	0	0	4.79501	7.99285	RNF14
hormone receptor binding (GO:0051427)	0.18883	1	0	0	4.79501	7.99285	NAMPT
phosphotransferase activity, phosphate group as acceptor (GO:0016776)	0.192772	1	0	0	4.68604	7.71437	STARD4
androgen receptor binding (GO:0050681)	0.200601	1	0	0	4.48229	7.20053	TLR7
transferase activity, transferring pentosyl groups (GO:0016763)	0.200601	1	0	0	4.48229	7.20053	EHHADH
cholesterol binding (GO:0015485)	0.212203	1	0	0	4.20787	6.52309	GALNT13
single-stranded RNA binding (GO:0003727)	0.212203	1	0	0	4.20787	6.52309	DNHD1
hydro-lyase activity (GO:0016836)	0.212203	1	0	0	4.20787	6.52309	STARD4
acetylgalactosaminyltransferase activity (GO:0008376)	0.23863	1	0	0	3.68189	5.27555	LTF
ATP-dependent microtubule motor activity (GO:1990939)	0.239194	1	0	0	1.60456	2.29529	FGF7;MMD;PRKG1;PDK1
sterol binding (GO:0032934)	0.242333	1	0	0	3.61729	5.1273	HIF1A
protein kinase activator activity (GO:0030295)	0.253336	1	0	0	3.43643	4.71835	TLR7
protein kinase activity (GO:0004672)	0.260298	1	0	0	2.02143	2.72069	GRHPR;TFEC
nuclear hormone receptor binding (GO:0035257)	0.26418	1	0	0	3.27279	4.35649	USP25
double-stranded RNA binding (GO:0003725)	0.26776	1	0	0	3.22165	4.24505	POGLUT1
transcription corepressor activity (GO:0003714)	0.26776	1	0	0	3.22165	4.24505	USP25
ubiquitin binding (GO:0043130)	0.26776	1	0	0	3.22165	4.24505	CPEB2
UDP-glycosyltransferase activity (GO:0008194)	0.271323	1	0	0	3.17209	4.13782	SLC16A7
ATPase binding (GO:0051117)	0.271323	1	0	0	3.17209	4.13782	HIF1A
mRNA 3'-UTR binding (GO:0003730)	0.274868	1	0	0	3.12402	4.03456	IDE
carboxylic acid transmembrane transporter activity (GO:0046943)	0.281908	1	0	0	3.03214	3.83922	CPEB2
transcription factor activity, RNA polymerase II distal enhancer sequence-specific binding (GO:0003705)	0.292342	1	0	0	2.90402	3.57146	SLC25A16
metalloendopeptidase activity (GO:0004222)	0.299214	1	0	0	2.82446	3.40798	CYP1B1
translation factor activity, RNA binding (GO:0008135)	0.300225	1	0	0	1.56597	1.8842	TFAM;FOXN2;HIF1A
organic anion transmembrane transporter activity (GO:0008514)	0.302625	1	0	0	2.78629	3.33034	LEPR
heme binding (GO:0020037)	0.30602	1	0	0	2.74914	3.25527	USP25
sequence-specific DNA binding (GO:0043565)	0.309398	1	0	0	2.71297	3.18265	VNN1
cytokine receptor activity (GO:0004896)	0.312761	1	0	0	2.67773	3.11238	RNF14
ubiquitin-like protein-specific protease activity (GO:0019783)	0.312761	1	0	0	2.67773	3.11238	USP25
hydrolase activity, acting on carbon-nitrogen (but not peptide) bonds, in linear amides (GO:0016811)	0.32933	1	0	0	2.51446	2.7928	IGHG3
steroid hormone receptor binding (GO:0035258)	0.364404	1	0	0	2.21705	2.23809	USP25
thiol-dependent ubiquitin-specific protease activity (GO:0004843)	0.387749	1	0	0	1.34177	1.27119	EHF;TFEC;TFAM
immunoglobulin receptor binding (GO:0034987)	0.388766	1	0	0	2.04144	1.92871	POGLUT1
thiol-dependent ubiquitinyl hydrolase activity (GO:0036459)	0.394755	1	0	0	1.47275	1.36891	ME1;IDE
RNA polymerase II regulatory region sequence-specific DNA binding (GO:0000977)	0.397662	1	0	0	1.98255	1.82822	PNPLA3
transferase activity, transferring hexosyl groups (GO:0016758)	0.403286	1	0	0	1.44692	1.31396	USP25;HIF1A
adenyl ribonucleotide binding (GO:0032559)	0.415135	1	0	0	1.41223	1.24156	RNF14;TFEC
carboxylic ester hydrolase activity (GO:0052689)	0.425199	1	0	0	1.3838	1.18342	USP25;HIF1A
ubiquitin protein ligase binding (GO:0031625)	0.451595	1	0	0	1.31328	1.04402	FASN;BZW1
transcription coactivator activity (GO:0003713)	0.464363	1	0	0	1.61082	1.23565	CFL2
ubiquitin-like protein ligase binding (GO:0044389)	0.513931	1	0	0	1.03984	0.692187	ALDH6A1;FASN;TFAM;TLR7;KCTD12;BZW1;CPEB2
cadherin binding (GO:0045296)	0.514322	1	0	0	1.39315	0.926311	FGF7
actin filament binding (GO:0051015)	0.515999	1	0	0	1.16161	0.768578	IGHG3;IDE
RNA binding (GO:0003723)	0.532988	1	0	0	1.3217	0.831689	TNFRSF11B
protein tyrosine kinase activity (GO:0004713)	0.584832	1	0	0	1.14548	0.614469	CPEB2
endopeptidase activity (GO:0004175)	0.596876	1	0	0	1.10852	0.572049	ENPEP
cytokine activity (GO:0005125)	0.59885	1	0	0	1.1026	0.565351	RNF14
mRNA binding (GO:0003729)	0.606196	1	0	0	0.984179	0.492632	GHR;HIF1A
peptidase activity, acting on L-amino acid peptides (GO:0070011)	0.610491	1	0	0	1.06832	0.527206	RNF14
ubiquitin-like protein ligase activity (GO:0061659)	0.616186	1	0	0	1.05197	0.509369	S100A9
kinase binding (GO:0019900)	0.618066	1	0	0	1.04663	0.503595	IGHG3
ubiquitin protein ligase activity (GO:0061630)	0.630973	1	0	0	1.01071	0.465426	DNHD1
microtubule binding (GO:0008017)	0.635275	1	0	0	0.922531	0.41855	EHF;TFAM;FOXN2;HIF1A
serine-type endopeptidase activity (GO:0004252)	0.660548	1	0	0	0.932966	0.386887	IGHG3
ATPase activity (GO:0016887)	0.697335	1	0	0	0.831393	0.299708	GHR;HIF1A
DNA binding (GO:0003677)	0.71284	1	0	0	0.808571	0.2737	CFL2
serine-type peptidase activity (GO:0008236)	0.71425	1	0	0	0.805412	0.271039	S100A9
protein kinase binding (GO:0019901)	0.71425	1	0	0	0.805412	0.271039	IDE
actin binding (GO:0003779)	0.727986	1	0	0	0.775134	0.246085	HIF1A
tubulin binding (GO:0015631)	0.741067	1	0	0	0.747049	0.223864	CPEB2
ATP binding (GO:0005524)	0.752307	1	0	0	0.723458	0.205904	S100A9
protein heterodimerization activity (GO:0046982)	0.836468	1	0	0	0.558768	0.0997774	PRKG1
GTPase regulator activity (GO:0030695)	0.841258	1	0	0	0.549828	0.0950419	TFAM
calcium ion binding (GO:0005509)	0.85766	1	0	0	0.519359	0.0797462	IDE
protein serine/threonine kinase activity (GO:0004674)	0.871748	1	0	0	0.493267	0.0677031	RNF14
transcription regulatory region DNA binding (GO:0044212)	0.88673	1	0	0	0.46543	0.0559516	S100A9
