# Supplementary material for: Molecular mechanisms of fat deposition: &lt;i&gt;IL-6&lt;/i&gt; is a hub gene in fat lipolysis, comparing thin-tailed with fat-tailed sheep breeds
Source: Copernicus journal article supplement (doi:10.5194/aab-64-53-2021), 2021-02-17
Supplement: Supplementary file 4 [file S4.xlsx]

## Sheet: UP_reg_DEGs_Biological_Process
Term	P-value	Adjusted P-value	Old P-value	Old Adjusted P-value	Odds Ratio	Combined Score	Genes
regulation of collagen biosynthetic process (GO:0032965)	2.93365e-05	0.149704	0	0	49.0196	511.602	IL6;CREB3L1;SERPINF2
cell chemotaxis (GO:0060326)	6.89889e-05	0.176025	0	0	18.2149	174.528	NR4A1;EGR3;SAA1;SAA2
positive regulation of JNK cascade (GO:0046330)	0.000171309	0.291397	0	0	14.43	125.138	GADD45B;SERPINF2;CCL19;GADD45G
positive regulation of stress-activated MAPK cascade (GO:0032874)	0.000208341	0.265791	0	0	13.7174	116.273	GADD45B;SERPINF2;CCL19;GADD45G
activation of MAPKKK activity (GO:0000185)	0.000265269	0.270734	0	0	79.3651	653.553	GADD45B;GADD45G
positive regulation of response to external stimulus (GO:0032103)	0.000325745	0.277046	0	0	12.21	98.039	PTGER4;THBD;SERPINF2;CCL19
regulation of JNK cascade (GO:0046328)	0.000325745	0.237468	0	0	12.21	98.039	GADD45B;SERPINF2;CCL19;GADD45G
positive regulation of smooth muscle cell proliferation (GO:0048661)	0.000344738	0.2199	0	0	21.9298	174.84	IL6;NR4A3;SERPINF2
endothelial cell chemotaxis (GO:0035767)	0.000452632	0.256643	0	0	61.7284	475.335	NR4A1;EGR3
negative regulation of fibrinolysis (GO:0051918)	0.000452632	0.230978	0	0	61.7284	475.335	THBD;SERPINF2
regulation of smooth muscle cell proliferation (GO:0048660)	0.000569508	0.2642	0	0	18.5185	138.347	IL6;NR4A3;SERPINF2
positive regulation of cellular component organization (GO:0051130)	0.00060234	0.256145	0	0	10.3842	76.9957	PPP1R15A;CDT1;PLEKHM2;CCL19
positive regulation of epithelial cell proliferation (GO:0050679)	0.000623819	0.244873	0	0	10.2881	75.9223	NR4A1;ECM1;EGR3;NR4A3
positive regulation of transcription from RNA polymerase II promoter in response to endoplasmic reticulum stress (GO:1990440)	0.000688306	0.250888	0	0	50.5051	367.741	CREB3L1;ATF3
response to prostaglandin E (GO:0034695)	0.000824045	0.28034	0	0	46.2963	328.763	PTGER4;CCL19
regulation of fibrinolysis (GO:0051917)	0.000971606	0.309882	0	0	42.735	296.434	THBD;SERPINF2
regulation of cell cycle (GO:0051726)	0.00109099	0.327489	0	0	6.43004	43.8572	NR4A1;GADD45B;SIK1;JUNB;GADD45G
interleukin-6-mediated signaling pathway (GO:0070102)	0.0011309	0.320611	0	0	39.6825	269.236	SOCS3;IL6
cell migration involved in sprouting angiogenesis (GO:0002042)	0.0011309	0.303737	0	0	39.6825	269.236	NR4A1;EGR3
positive regulation of cytokine production (GO:0001819)	0.0012077	0.308144	0	0	6.28457	42.2262	PTGER4;IL6;SERPINF2;SAA1;CCL19
positive regulation of collagen biosynthetic process (GO:0032967)	0.00130185	0.316351	0	0	37.037	246.073	CREB3L1;SERPINF2
positive regulation of collagen metabolic process (GO:0010714)	0.00130185	0.301971	0	0	37.037	246.073	CREB3L1;SERPINF2
negative regulation of peptidase activity (GO:0010466)	0.00152165	0.337607	0	0	13.2275	85.8196	ECM1;SERPINF2;TIMP1
response to purine-containing compound (GO:0014074)	0.00167838	0.356866	0	0	32.6797	208.821	DGKQ;JUNB
positive regulation of macromolecule biosynthetic process (GO:0010557)	0.00176892	0.361073	0	0	7.77001	49.2415	IL6;CREB3L1;SERPINF2;CCL19
blood vessel endothelial cell migration (GO:0043534)	0.00188379	0.36973	0	0	30.8642	193.656	NR4A1;EGR3
regulation of chemokine production (GO:0032642)	0.00188379	0.356036	0	0	30.8642	193.656	IL6;ACKR1
positive regulation of p38MAPK cascade (GO:1900745)	0.00188379	0.343321	0	0	30.8642	193.656	GADD45B;GADD45G
response to organophosphorus (GO:0046683)	0.00188379	0.331482	0	0	30.8642	193.656	DGKQ;JUNB
acute-phase response (GO:0006953)	0.00188379	0.320433	0	0	30.8642	193.656	IL6;SAA1
positive regulation of endothelial cell proliferation (GO:0001938)	0.00189584	0.312079	0	0	12.2549	76.8149	NR4A1;ECM1;EGR3
positive regulation of blood coagulation (GO:0030194)	0.00210052	0.334967	0	0	29.2398	180.28	THBD;SERPINF2
negative regulation of calcium ion transport (GO:0051926)	0.00210052	0.324817	0	0	29.2398	180.28	STC1;PACSIN3
regulation of transcription from RNA polymerase II promoter (GO:0006357)	0.00218721	0.328275	0	0	2.44159	14.955	SERPINF2;ARID5A;PAGR1;FOSL1;NR4A1;IL6;NR4A3;DGKQ;MAFF;DMAP1;JUNB;MDFI;ATF3
regulation of gluconeogenesis (GO:0006111)	0.00232849	0.339494	0	0	27.7778	168.404	DGKQ;SIK1
negative regulation of ion transport (GO:0043271)	0.00232849	0.330064	0	0	27.7778	168.404	STC1;PACSIN3
regulation of membrane protein ectodomain proteolysis (GO:0051043)	0.00281782	0.388631	0	0	25.2525	148.278	PACSIN3;TIMP1
regulation of endothelial cell proliferation (GO:0001936)	0.00301379	0.40472	0	0	10.4167	60.4641	NR4A1;ECM1;EGR3
cellular response to interleukin-6 (GO:0071354)	0.00307902	0.402878	0	0	24.1546	139.689	SOCS3;IL6
cellular response to hormone stimulus (GO:0032870)	0.00312169	0.39825	0	0	10.2881	59.3558	NR4A3;SIK1;JUNB
positive regulation of protein secretion (GO:0050714)	0.00334456	0.416275	0	0	10.0402	57.2331	PTGER4;IL6;SAA1
cellular response to vascular endothelial growth factor stimulus (GO:0035924)	0.0039278	0.477228	0	0	21.3675	118.369	NR4A1;EGR3
regulation of p38MAPK cascade (GO:1900744)	0.00423219	0.502253	0	0	20.5761	112.449	GADD45B;GADD45G
positive regulation of cell proliferation (GO:0008284)	0.0042618	0.494272	0	0	3.92157	21.4042	FOSL1;IL6;NR4A3;SERTAD1;SERPINF2;TIMP1
acute inflammatory response (GO:0002526)	0.00487269	0.552563	0	0	19.1571	101.994	IL6;SAA1
positive regulation of transcription from RNA polymerase II promoter in response to stress (GO:0036003)	0.00520864	0.577819	0	0	18.5185	97.3599	CREB3L1;ATF3
positive regulation of interleukin-1 secretion (GO:0050716)	0.00520864	0.565525	0	0	18.5185	97.3599	SAA1;CCL19
lysosome localization (GO:0032418)	0.00520864	0.553743	0	0	18.5185	97.3599	NR4A3;PLEKHM2
positive regulation of cell differentiation (GO:0045597)	0.0053792	0.560205	0	0	5.69801	29.7733	IL6;PKDCC;SERPINF2;JUNB
ribosomal large subunit assembly (GO:0000027)	0.00555496	0.566939	0	0	17.9211	93.0657	PPAN-P2RY11;PPAN
regulation of cytokine secretion (GO:0050707)	0.00591157	0.591504	0	0	17.3611	89.0772	PTGER4;SAA1
cellular response to cytokine stimulus (GO:0071345)	0.00603803	0.59254	0	0	3.64697	18.6349	SOCS3;IL6;SAA1;TIMP1;CCL19;JUNB
positive regulation of transcription factor import into nucleus (GO:0042993)	0.00627839	0.604502	0	0	16.835	85.3643	DMAP1;CCL19
regulation of phosphatidylinositol 3-kinase activity (GO:0043551)	0.00665535	0.62893	0	0	16.3399	81.9009	WDR91;CCL19
response to endoplasmic reticulum stress (GO:0034976)	0.00679482	0.630436	0	0	7.78816	38.8754	PPP1R15A;CREB3L1;ATF3
bone development (GO:0060348)	0.00704237	0.641736	0	0	15.873	78.6637	PTGER4;STC1
endothelial cell migration (GO:0043542)	0.00743937	0.66602	0	0	15.4321	75.6322	NR4A1;EGR3
negative regulation of blood coagulation (GO:0030195)	0.00784629	0.690338	0	0	15.015	72.7885	THBD;SERPINF2
positive regulation of peptidyl-tyrosine phosphorylation (GO:0050731)	0.00868078	0.750814	0	0	7.12251	33.808	SOCS3;IL6;DGKQ
response to cAMP (GO:0051591)	0.00957159	0.814064	0	0	13.5501	62.994	DGKQ;JUNB
regulation of cell differentiation (GO:0045595)	0.00972767	0.813775	0	0	6.8306	31.6447	SERPINF2;SIK1;JUNB
negative regulation of proteolysis (GO:0045861)	0.010027	0.825283	0	0	13.2275	60.8793	ECM1;TIMP1
monocyte chemotaxis (GO:0002548)	0.010027	0.812183	0	0	13.2275	60.8793	IL6;CCL19
platelet degranulation (GO:0002576)	0.0103896	0.828411	0	0	6.66667	30.4463	ECM1;SERPINF2;TIMP1
positive regulation of cellular process (GO:0048522)	0.0110313	0.866045	0	0	3.20513	14.4456	FOSL1;IL6;SERTAD1;SERPINF2;TIMP1;JUNB
positive regulation of transcription from RNA polymerase II promoter (GO:0045944)	0.0111038	0.858524	0	0	2.61746	11.7798	PAGR1;NR4A1;IL6;NR4A3;SERPINF2;MAFF;JUNB;ATF3
positive regulation of transport (GO:0051050)	0.0114496	0.872048	0	0	12.3457	55.1827	NR4A3;CCL19
sprouting angiogenesis (GO:0002040)	0.0114496	0.859224	0	0	12.3457	55.1827	NR4A1;EGR3
lymphocyte chemotaxis (GO:0048247)	0.0114496	0.846772	0	0	12.3457	55.1827	SAA1;CCL19
protein complex subunit organization (GO:0071822)	0.0119424	0.870601	0	0	12.0773	53.4742	CDT1;SERPINF2
inflammatory response (GO:0006954)	0.0131454	0.944804	0	0	4.39174	19.0236	PTGER4;IL6;CCL19;ACKR1
positive regulation of chemotaxis (GO:0050921)	0.0134757	0.955088	0	0	11.3379	48.8307	IL6;CCL19
regulation of bone mineralization (GO:0030500)	0.0145428	1	0	0	10.8932	46.0856	ECM1;PKDCC
regulation of DNA binding (GO:0051101)	0.0156453	1	0	0	10.4822	43.5805	CDT1;MDFI
regulation of calcium ion transport (GO:0051924)	0.0156453	1	0	0	10.4822	43.5805	STC1;PACSIN3
positive regulation of ossification (GO:0045778)	0.0156453	1	0	0	10.4822	43.5805	IL6;PKDCC
negative regulation of transcription from RNA polymerase II promoter (GO:0000122)	0.0161725	1	0	0	2.94464	12.145	NR4A3;ARID5A;DMAP1;JUNB;MDFI;ATF3
positive regulation of protein import into nucleus (GO:0042307)	0.0162097	1	0	0	10.2881	42.4089	IL6;DMAP1
neutrophil chemotaxis (GO:0030593)	0.0162097	1	0	0	10.2881	42.4089	SAA1;CCL19
positive regulation of tyrosine phosphorylation of STAT protein (GO:0042531)	0.0162097	1	0	0	10.2881	42.4089	SOCS3;IL6
regulated exocytosis (GO:0045055)	0.0166201	1	0	0	5.59284	22.9147	ECM1;SERPINF2;TIMP1
fat cell differentiation (GO:0045444)	0.0173642	1	0	0	9.92063	40.2118	NR4A1;NR4A3
regulation of secretion by cell (GO:1903530)	0.0179542	1	0	0	9.74659	39.1806	SCG5;SAA1
ribosome assembly (GO:0042255)	0.0179542	1	0	0	9.74659	39.1806	PPAN-P2RY11;PPAN
granulocyte chemotaxis (GO:0071621)	0.0179542	1	0	0	9.74659	39.1806	SAA1;CCL19
positive regulation of transcription, DNA-templated (GO:0045893)	0.0188349	1	0	0	2.23015	8.85826	PAGR1;FOSL1;NR4A1;IL6;NR4A3;SERPINF2;MAFF;JUNB;ATF3
neutrophil migration (GO:1990266)	0.0191595	1	0	0	9.4162	37.2407	SAA1;CCL19
regulation of stress fiber assembly (GO:0051492)	0.0203979	1	0	0	9.10747	35.4492	PTGER4;SERPINF2
positive regulation of T cell proliferation (GO:0042102)	0.0210294	1	0	0	8.96057	34.6042	IL6;CCL19
regulation of tyrosine phosphorylation of STAT protein (GO:0042509)	0.0210294	1	0	0	8.96057	34.6042	SOCS3;IL6
positive regulation of I-kappaB kinase/NF-kappaB signaling (GO:0043123)	0.0213749	1	0	0	5.0813	19.5403	ECM1;S100A4;CCL19
immunological synapse formation (GO:0001771)	0.021409	1	0	0	46.2963	177.96	CCL19
response to catecholamine (GO:0071869)	0.021409	1	0	0	46.2963	177.96	NR4A3
positive regulation of intracellular estrogen receptor signaling pathway (GO:0033148)	0.021409	1	0	0	46.2963	177.96	PAGR1
regulation of translational initiation in response to stress (GO:0043558)	0.021409	1	0	0	46.2963	177.96	PPP1R15A
T-helper 17 cell lineage commitment (GO:0072540)	0.021409	1	0	0	46.2963	177.96	IL6
positive regulation of dendritic cell antigen processing and presentation (GO:0002606)	0.021409	1	0	0	46.2963	177.96	CCL19
cellular response to monoamine stimulus (GO:0071868)	0.021409	1	0	0	46.2963	177.96	NR4A3
regulation of cortisol biosynthetic process (GO:2000064)	0.021409	1	0	0	46.2963	177.96	DGKQ
negative regulation of bone resorption (GO:0045779)	0.021409	1	0	0	46.2963	177.96	IL6
positive regulation of extrinsic apoptotic signaling pathway via death domain receptors (GO:1902043)	0.021409	1	0	0	46.2963	177.96	ATF3
negative regulation of cellular extravasation (GO:0002692)	0.021409	1	0	0	46.2963	177.96	PTGER4
positive regulation of myeloid leukocyte cytokine production involved in immune response (GO:0061081)	0.021409	1	0	0	46.2963	177.96	NR4A3
positive regulation of antigen processing and presentation (GO:0002579)	0.021409	1	0	0	46.2963	177.96	CCL19
regulation of T cell proliferation (GO:0042129)	0.021669	1	0	0	8.81834	33.7908	IL6;CCL19
ribosomal large subunit biogenesis (GO:0042273)	0.0223166	1	0	0	8.68056	33.0071	PPAN-P2RY11;PPAN
positive regulation of JAK-STAT cascade (GO:0046427)	0.0229722	1	0	0	8.54701	32.2519	SOCS3;IL6
regulation of JAK-STAT cascade (GO:0046425)	0.0236357	1	0	0	8.41751	31.5235	SOCS3;IL6
JNK cascade (GO:0007254)	0.0243071	1	0	0	8.29187	30.8208	PTGER4;CCL19
regulation of T-helper 1 cell differentiation (GO:0045625)	0.024933	1	0	0	39.6825	146.491	CCL19
negative regulation of membrane protein ectodomain proteolysis (GO:0051045)	0.024933	1	0	0	39.6825	146.491	TIMP1
regulation of hormone biosynthetic process (GO:0046885)	0.024933	1	0	0	39.6825	146.491	DGKQ
regulation of chemokine biosynthetic process (GO:0045073)	0.024933	1	0	0	39.6825	146.491	IL6
regulation of cell projection organization (GO:0031344)	0.024933	1	0	0	39.6825	146.491	CCL19
flavin-containing compound metabolic process (GO:0042726)	0.024933	1	0	0	39.6825	146.491	ACP5
pri-miRNA transcription from RNA polymerase II promoter (GO:0061614)	0.024933	1	0	0	39.6825	146.491	FOSL1
riboflavin metabolic process (GO:0006771)	0.024933	1	0	0	39.6825	146.491	ACP5
regulation of systemic arterial blood pressure by renin-angiotensin (GO:0003081)	0.024933	1	0	0	39.6825	146.491	SERPINF2
negative regulation of dendritic cell apoptotic process (GO:2000669)	0.024933	1	0	0	39.6825	146.491	CCL19
cellular response to leptin stimulus (GO:0044320)	0.024933	1	0	0	39.6825	146.491	NR4A3
regulation of anion transport (GO:0044070)	0.024933	1	0	0	39.6825	146.491	STC1
positive regulation of apoptotic process (GO:0043065)	0.0250497	1	0	0	3.6075	13.3005	IL6;GADD45B;SIK1;GADD45G
regulation of endopeptidase activity (GO:0052548)	0.0256731	1	0	0	8.05153	29.4872	SERPINF2;TIMP1
positive regulation of T cell activation (GO:0050870)	0.0256731	1	0	0	8.05153	29.4872	IL6;CCL19
regulation of endocytosis (GO:0030100)	0.0263676	1	0	0	7.93651	28.8541	PACSIN3;CCL19
positive regulation of MAP kinase activity (GO:0043406)	0.0264174	1	0	0	4.68165	17.0119	GADD45B;SAA1;GADD45G
regulation of angiogenesis (GO:0045765)	0.0264174	1	0	0	4.68165	17.0119	ECM1;IL6;STAB1
cytokine-mediated signaling pathway (GO:0019221)	0.0265123	1	0	0	2.62881	9.54297	SOCS3;IL6;SAA1;TIMP1;CCL19;JUNB
positive regulation of lymphocyte proliferation (GO:0050671)	0.0277793	1	0	0	7.71605	27.6502	IL6;CCL19
defense response to Gram-negative bacterium (GO:0050829)	0.0277793	1	0	0	7.71605	27.6502	IGHM;IL6
phospholipid homeostasis (GO:0055091)	0.0284445	1	0	0	34.7222	123.604	LIPG
mast cell activation involved in immune response (GO:0002279)	0.0284445	1	0	0	34.7222	123.604	NR4A3
T-helper cell lineage commitment (GO:0002295)	0.0284445	1	0	0	34.7222	123.604	IL6
cellular response to prostaglandin E stimulus (GO:0071380)	0.0284445	1	0	0	34.7222	123.604	PTGER4
regulation of striated muscle cell differentiation (GO:0051153)	0.0284445	1	0	0	34.7222	123.604	SIK1
T-helper 17 cell differentiation (GO:0072539)	0.0284445	1	0	0	34.7222	123.604	IL6
positive regulation of behavior (GO:0048520)	0.0284445	1	0	0	34.7222	123.604	NR4A3
response to leptin (GO:0044321)	0.0284445	1	0	0	34.7222	123.604	NR4A3
organophosphate catabolic process (GO:0046434)	0.0284445	1	0	0	34.7222	123.604	LIPG
positive regulation of chromatin binding (GO:0035563)	0.0284445	1	0	0	34.7222	123.604	CDT1
positive regulation of transforming growth factor beta production (GO:0071636)	0.0284445	1	0	0	34.7222	123.604	SERPINF2
regulation of T-helper 2 cell cytokine production (GO:2000551)	0.0284445	1	0	0	34.7222	123.604	IL6
regulation of PERK-mediated unfolded protein response (GO:1903897)	0.0284445	1	0	0	34.7222	123.604	PPP1R15A
mast cell degranulation (GO:0043303)	0.0284445	1	0	0	34.7222	123.604	NR4A3
negative regulation of bone remodeling (GO:0046851)	0.0284445	1	0	0	34.7222	123.604	IL6
regulation of dendritic cell antigen processing and presentation (GO:0002604)	0.0284445	0.994192	0	0	34.7222	123.604	CCL19
regulation of epithelial cell proliferation (GO:0050678)	0.0284964	0.989231	0	0	7.61035	27.0775	NR4A1;NR4A3
positive regulation of inflammatory response (GO:0050729)	0.0292209	1	0	0	7.50751	26.5231	PTGER4;IL6
positive regulation of cytokine secretion (GO:0050715)	0.0292209	1	0	0	7.50751	26.5231	PTGER4;SAA1
cAMP-mediated signaling (GO:0019933)	0.0306918	1	0	0	7.30994	25.4661	PTGER4;DGKQ
regulation of integrin activation (GO:0033623)	0.0319434	1	0	0	30.8642	106.29	PTGER4
myeloid leukocyte mediated immunity (GO:0002444)	0.0319434	1	0	0	30.8642	106.29	IL6
regulation of immunoglobulin secretion (GO:0051023)	0.0319434	1	0	0	30.8642	106.29	IL6
negative regulation of lipid localization (GO:1905953)	0.0319434	1	0	0	30.8642	106.29	IL6
integrin activation (GO:0033622)	0.0319434	1	0	0	30.8642	106.29	COL16A1
mast cell mediated immunity (GO:0002448)	0.0319434	1	0	0	30.8642	106.29	NR4A3
nicotinamide nucleotide biosynthetic process (GO:0019359)	0.0319434	1	0	0	30.8642	106.29	NMNAT3
regulation of interleukin-1 secretion (GO:0050704)	0.0319434	1	0	0	30.8642	106.29	SAA1
positive regulation of mitotic metaphase/anaphase transition (GO:0045842)	0.0319434	1	0	0	30.8642	106.29	CDT1
regulation of muscle system process (GO:0090257)	0.0319434	1	0	0	30.8642	106.29	TNNC1
regulation of cell-cell adhesion mediated by cadherin (GO:2000047)	0.0319434	1	0	0	30.8642	106.29	SERPINF2
negative regulation of tyrosine phosphorylation of STAT protein (GO:0042532)	0.0319434	1	0	0	30.8642	106.29	SOCS3
positive regulation of immunoglobulin secretion (GO:0051024)	0.0319434	1	0	0	30.8642	106.29	IL6
regulation of glycoprotein biosynthetic process (GO:0010559)	0.0319434	0.993947	0	0	30.8642	106.29	CCL19
negative regulation of inflammatory response (GO:0050728)	0.0329523	1	0	0	7.03235	23.9993	PTGER4;SAA1
negative regulation of defense response (GO:0031348)	0.0344946	1	0	0	6.85871	23.093	PTGER4;SAA1
negative regulation of gluconeogenesis (GO:0045721)	0.03543	1	0	0	27.7778	92.7832	SIK1
dorsal/ventral axis specification (GO:0009950)	0.03543	1	0	0	27.7778	92.7832	MDFI
positive regulation of calcium ion import (GO:0090280)	0.03543	1	0	0	27.7778	92.7832	STC1
negative regulation of oxidative stress-induced neuron death (GO:1903204)	0.03543	1	0	0	27.7778	92.7832	NR4A3
macrophage chemotaxis (GO:0048246)	0.03543	1	0	0	27.7778	92.7832	SAA1
glycerolipid metabolic process (GO:0046486)	0.03543	1	0	0	27.7778	92.7832	DGKQ
negative regulation of endoplasmic reticulum unfolded protein response (GO:1900102)	0.03543	1	0	0	27.7778	92.7832	PPP1R15A
negative regulation of reproductive process (GO:2000242)	0.03543	1	0	0	27.7778	92.7832	TIMP1
negative regulation of cell activation (GO:0050866)	0.03543	1	0	0	27.7778	92.7832	THBD
macrophage migration (GO:1905517)	0.03543	1	0	0	27.7778	92.7832	SAA1
regulation of dendritic cell apoptotic process (GO:2000668)	0.03543	1	0	0	27.7778	92.7832	CCL19
regulation of phospholipid metabolic process (GO:1903725)	0.03543	1	0	0	27.7778	92.7832	WDR91
regulation of plasminogen activation (GO:0010755)	0.03543	1	0	0	27.7778	92.7832	SERPINF2
regulation of actin filament-based movement (GO:1903115)	0.03543	1	0	0	27.7778	92.7832	STC1
regulation of DNA-templated transcription, initiation (GO:2000142)	0.03543	0.998891	0	0	27.7778	92.7832	FOSL1
regulation of transforming growth factor beta production (GO:0071634)	0.03543	0.993403	0	0	27.7778	92.7832	SERPINF2
positive regulation of intracellular steroid hormone receptor signaling pathway (GO:0033145)	0.03543	0.987974	0	0	27.7778	92.7832	PAGR1
positive regulation of type 2 immune response (GO:0002830)	0.03543	0.982605	0	0	27.7778	92.7832	IL6
epithelial cell morphogenesis (GO:0003382)	0.03543	0.977294	0	0	27.7778	92.7832	STC1
negative regulation of endopeptidase activity (GO:0010951)	0.0368598	1	0	0	6.61376	21.8296	SERPINF2;TIMP1
regulation of I-kappaB kinase/NF-kappaB signaling (GO:0043122)	0.0377843	1	0	0	4.06504	13.3165	ECM1;S100A4;CCL19
regulation of peptidyl-tyrosine phosphorylation (GO:0050730)	0.0384705	1	0	0	6.45995	21.0456	IL6;DGKQ
protein kinase C signaling (GO:0070528)	0.0389042	1	0	0	25.2525	81.9862	DGKQ
positive regulation of cell cycle phase transition (GO:1901989)	0.0389042	1	0	0	25.2525	81.9862	PAGR1
cellular response to prostaglandin stimulus (GO:0071379)	0.0389042	1	0	0	25.2525	81.9862	PTGER4
regulation of feeding behavior (GO:0060259)	0.0389042	1	0	0	25.2525	81.9862	NR4A3
regulation of lipid kinase activity (GO:0043550)	0.0389042	1	0	0	25.2525	81.9862	WDR91
regulation of trophoblast cell migration (GO:1901163)	0.0389042	1	0	0	25.2525	81.9862	TIMP1
negative regulation of bone mineralization (GO:0030502)	0.0389042	1	0	0	25.2525	81.9862	ECM1
response to nitric oxide (GO:0071731)	0.0389042	1	0	0	25.2525	81.9862	CCL19
T-helper cell differentiation (GO:0042093)	0.0389042	1	0	0	25.2525	81.9862	PTGER4
pyrimidine nucleoside catabolic process (GO:0046135)	0.0389042	1	0	0	25.2525	81.9862	UPP1
positive regulation of glycoprotein biosynthetic process (GO:0010560)	0.0389042	0.997628	0	0	25.2525	81.9862	CCL19
response to corticosteroid (GO:0031960)	0.0389042	0.99264	0	0	25.2525	81.9862	IL6
regulation of chromatin binding (GO:0035561)	0.0389042	0.987702	0	0	25.2525	81.9862	CDT1
positive regulation of fatty acid oxidation (GO:0046321)	0.0389042	0.982812	0	0	25.2525	81.9862	NR4A3
positive regulation of T-helper cell differentiation (GO:0045624)	0.0389042	0.977971	0	0	25.2525	81.9862	CCL19
regulation of integrin-mediated signaling pathway (GO:2001044)	0.0389042	0.973177	0	0	25.2525	81.9862	TIMP1
calcium ion homeostasis (GO:0055074)	0.0401078	0.99839	0	0	6.31313	20.3042	STC1;CCL19
post-translational protein modification (GO:0043687)	0.0401664	0.994997	0	0	3.10366	9.97742	SOCS3;SPSB2;IL6;TIMP1
positive regulation of protein complex assembly (GO:0031334)	0.0409362	1	0	0	6.2422	19.9484	FOSL1;CDT1
positive regulation of chondrocyte differentiation (GO:0032332)	0.042366	1	0	0	23.1481	73.1808	PKDCC
PERK-mediated unfolded protein response (GO:0036499)	0.042366	1	0	0	23.1481	73.1808	ATF3
regulation of hormone secretion (GO:0046883)	0.042366	1	0	0	23.1481	73.1808	SCG5
pyrimidine-containing compound salvage (GO:0008655)	0.042366	1	0	0	23.1481	73.1808	UPP1
kinetochore organization (GO:0051383)	0.042366	1	0	0	23.1481	73.1808	CDT1
positive regulation of interleukin-1 production (GO:0032732)	0.042366	1	0	0	23.1481	73.1808	SAA1
regulation of DNA-dependent DNA replication (GO:0090329)	0.042366	1	0	0	23.1481	73.1808	CDT1
plasma membrane tubulation (GO:0097320)	0.042366	1	0	0	23.1481	73.1808	PACSIN3
pyrimidine nucleoside salvage (GO:0043097)	0.042366	1	0	0	23.1481	73.1808	UPP1
positive regulation of DNA-dependent DNA replication (GO:2000105)	0.042366	0.996285	0	0	23.1481	73.1808	CDT1
cellular response to arsenic-containing substance (GO:0071243)	0.042366	0.991715	0	0	23.1481	73.1808	ATF3
negative regulation of leukocyte apoptotic process (GO:2000107)	0.042366	0.987186	0	0	23.1481	73.1808	CCL19
regulation of actomyosin structure organization (GO:0110020)	0.042366	0.982699	0	0	23.1481	73.1808	PTGER4
positive regulation of T-helper 1 type immune response (GO:0002827)	0.042366	0.978253	0	0	23.1481	73.1808	CCL19
positive regulation of T cell cytokine production (GO:0002726)	0.042366	0.973846	0	0	23.1481	73.1808	IL6
attachment of mitotic spindle microtubules to kinetochore (GO:0051315)	0.042366	0.969479	0	0	23.1481	73.1808	CDT1
skeletal muscle fiber development (GO:0048741)	0.042366	0.965151	0	0	23.1481	73.1808	C11ORF88
nucleoside catabolic process (GO:0009164)	0.042366	0.960861	0	0	23.1481	73.1808	UPP1
positive regulation of cellular protein metabolic process (GO:0032270)	0.0434601	0.981313	0	0	6.03865	18.9367	IL6;ASPSCR1
protein localization to endoplasmic reticulum (GO:0070972)	0.0458156	1	0	0	21.3675	65.8789	PPP1R15A
negative regulation of hemostasis (GO:1900047)	0.0458156	1	0	0	21.3675	65.8789	THBD
cardiocyte differentiation (GO:0035051)	0.0458156	1	0	0	21.3675	65.8789	SIK1
negative regulation of chemokine production (GO:0032682)	0.0458156	1	0	0	21.3675	65.8789	IL6
diacylglycerol metabolic process (GO:0046339)	0.0458156	1	0	0	21.3675	65.8789	DGKQ
regulation of triglyceride biosynthetic process (GO:0010866)	0.0458156	1	0	0	21.3675	65.8789	SIK1
regulation of fatty acid oxidation (GO:0046320)	0.0458156	1	0	0	21.3675	65.8789	NR4A3
cellular response to fibroblast growth factor stimulus (GO:0044344)	0.0460407	1	0	0	5.84795	18.0013	NR4A1;EGR3
regulation of B cell activation (GO:0050864)	0.0469133	1	0	0	5.78704	17.7052	IGHM;IL6
cellular metal ion homeostasis (GO:0006875)	0.0477919	1	0	0	5.72738	17.4164	STC1;CCL19
negative regulation of hydrogen peroxide-induced cell death (GO:1903206)	0.0492529	1	0	0	19.8413	59.7379	NR4A3
nucleoside salvage (GO:0043174)	0.0492529	1	0	0	19.8413	59.7379	UPP1
positive regulation of muscle hypertrophy (GO:0014742)	0.0492529	1	0	0	19.8413	59.7379	NR4A3
pyrimidine-containing compound catabolic process (GO:0072529)	0.0492529	1	0	0	19.8413	59.7379	UPP1
negative regulation of endoplasmic reticulum stress-induced intrinsic apoptotic signaling pathway (GO:1902236)	0.0492529	1	0	0	19.8413	59.7379	CREB3L1
regulation of response to interferon-gamma (GO:0060330)	0.0492529	1	0	0	19.8413	59.7379	SOCS3
myotube cell development (GO:0014904)	0.0492529	1	0	0	19.8413	59.7379	C11ORF88
negative regulation of biomineral tissue development (GO:0070168)	0.0492529	1	0	0	19.8413	59.7379	ECM1
regulation of mitotic cell cycle spindle assembly checkpoint (GO:0090266)	0.0492529	1	0	0	19.8413	59.7379	CDT1
response to ATP (GO:0033198)	0.0492529	1	0	0	19.8413	59.7379	DGKQ
response to molecule of bacterial origin (GO:0002237)	0.0495672	1	0	0	5.61167	16.8599	IL6;JUNB
extracellular matrix organization (GO:0030198)	0.0501977	1	0	0	3.62319	10.8398	COL16A1;SERPINF2;TIMP1
regulation of cell proliferation (GO:0042127)	0.0504097	1	0	0	2.24921	6.71968	FOSL1;IL6;NR4A3;SERTAD1;TIMP1;JUNB
cellular divalent inorganic cation homeostasis (GO:0072503)	0.0522745	1	0	0	5.44662	16.0743	STC1;CCL19
activation of protein kinase activity (GO:0032147)	0.0523475	1	0	0	3.56125	10.5052	GADD45B;SAA1;GADD45G
positive regulation of acute inflammatory response (GO:0002675)	0.0526779	1	0	0	18.5185	54.5103	IL6
cardiac muscle cell differentiation (GO:0055007)	0.0526779	1	0	0	18.5185	54.5103	SIK1
negative regulation of coagulation (GO:0050819)	0.0526779	1	0	0	18.5185	54.5103	THBD
negative regulation of protein processing (GO:0010955)	0.0526779	1	0	0	18.5185	54.5103	SERPINF2
negative regulation of peptidyl-threonine phosphorylation (GO:0010801)	0.0526779	1	0	0	18.5185	54.5103	DGKQ
positive regulation of membrane protein ectodomain proteolysis (GO:0051044)	0.0526779	1	0	0	18.5185	54.5103	PACSIN3
cytoplasmic sequestering of protein (GO:0051220)	0.0526779	1	0	0	18.5185	54.5103	MDFI
negative regulation of platelet activation (GO:0010544)	0.0526779	1	0	0	18.5185	54.5103	THBD
pyrimidine nucleoside metabolic process (GO:0006213)	0.0526779	1	0	0	18.5185	54.5103	UPP1
regulation of peptide secretion (GO:0002791)	0.0526779	1	0	0	18.5185	54.5103	SAA1
pyrimidine nucleoside biosynthetic process (GO:0046134)	0.0526779	1	0	0	18.5185	54.5103	UPP1
endoderm development (GO:0007492)	0.0526779	1	0	0	18.5185	54.5103	DUSP2
positive regulation of NF-kappaB import into nucleus (GO:0042346)	0.0526779	1	0	0	18.5185	54.5103	CCL19
positive regulation of phosphoprotein phosphatase activity (GO:0032516)	0.0526779	1	0	0	18.5185	54.5103	PPP1R15A
cellular response to virus (GO:0098586)	0.0526779	1	0	0	18.5185	54.5103	CCL19
positive regulation of lymphocyte activation (GO:0051251)	0.0550336	1	0	0	5.29101	15.3429	IGHM;IL6
positive regulation of epithelial cell apoptotic process (GO:1904037)	0.0560908	1	0	0	17.3611	50.0136	IL6
regulation of energy homeostasis (GO:2000505)	0.0560908	1	0	0	17.3611	50.0136	NR4A3
regulation of steroid metabolic process (GO:0019218)	0.0560908	1	0	0	17.3611	50.0136	DGKQ
dendritic cell chemotaxis (GO:0002407)	0.0560908	1	0	0	17.3611	50.0136	CCL19
positive regulation of cardiac muscle hypertrophy (GO:0010613)	0.0560908	1	0	0	17.3611	50.0136	NR4A3
fibrinolysis (GO:0042730)	0.0560908	1	0	0	17.3611	50.0136	SERPINF2
DNA methylation or demethylation (GO:0044728)	0.0560908	1	0	0	17.3611	50.0136	DMAP1
DNA alkylation (GO:0006305)	0.0560908	1	0	0	17.3611	50.0136	DMAP1
regulation of glucose transport (GO:0010827)	0.0560908	1	0	0	17.3611	50.0136	NR4A3
histone H2A acetylation (GO:0043968)	0.0560908	1	0	0	17.3611	50.0136	DMAP1
positive regulation of response to endoplasmic reticulum stress (GO:1905898)	0.0560908	1	0	0	17.3611	50.0136	PPP1R15A
negative regulation of lipid storage (GO:0010888)	0.0560908	1	0	0	17.3611	50.0136	IL6
cytoplasmic sequestering of transcription factor (GO:0042994)	0.0560908	1	0	0	17.3611	50.0136	MDFI
positive regulation of DNA-templated transcription, initiation (GO:2000144)	0.0560908	1	0	0	17.3611	50.0136	FOSL1
defense response to bacterium (GO:0042742)	0.0567795	1	0	0	3.44353	9.87803	IGHM;IL6;STAB1
negative regulation of response to external stimulus (GO:0032102)	0.0578433	1	0	0	5.14403	14.6606	PTGER4;SAA1
regulation of cytokine production (GO:0001817)	0.0587908	1	0	0	5.09684	14.4433	IL6;ACKR1
negative regulation of lipid biosynthetic process (GO:0051055)	0.0594916	1	0	0	16.3399	46.1098	SIK1
gastrulation (GO:0007369)	0.0594916	1	0	0	16.3399	46.1098	NR4A3
regulation of cellular protein catabolic process (GO:1903362)	0.0594916	1	0	0	16.3399	46.1098	WDR91
high-density lipoprotein particle remodeling (GO:0034375)	0.0594916	1	0	0	16.3399	46.1098	LIPG
positive regulation of cholesterol transport (GO:0032376)	0.0594916	1	0	0	16.3399	46.1098	LIPG
reverse cholesterol transport (GO:0043691)	0.0594916	1	0	0	16.3399	46.1098	LIPG
positive regulation of focal adhesion assembly (GO:0051894)	0.0594916	1	0	0	16.3399	46.1098	COL16A1
positive regulation of cartilage development (GO:0061036)	0.0594916	1	0	0	16.3399	46.1098	PKDCC
phospholipid catabolic process (GO:0009395)	0.0594916	1	0	0	16.3399	46.1098	LIPG
positive regulation of fatty acid metabolic process (GO:0045923)	0.0594916	1	0	0	16.3399	46.1098	NR4A3
negative regulation of cellular carbohydrate metabolic process (GO:0010677)	0.0594916	1	0	0	16.3399	46.1098	SIK1
negative regulation of phosphoprotein phosphatase activity (GO:0032515)	0.0594916	1	0	0	16.3399	46.1098	PPP1R15A
DNA replication checkpoint (GO:0000076)	0.0594916	1	0	0	16.3399	46.1098	CDT1
cellular response to peptide hormone stimulus (GO:0071375)	0.0607021	1	0	0	5.00501	14.0229	NR4A1;NR4A3
negative regulation of protein transport (GO:0051224)	0.0628803	1	0	0	15.4321	42.6932	PKDCC
DNA methylation (GO:0006306)	0.0628803	1	0	0	15.4321	42.6932	DMAP1
skeletal muscle contraction (GO:0003009)	0.0628803	1	0	0	15.4321	42.6932	TNNC1
regulation of peptidase activity (GO:0052547)	0.0628803	1	0	0	15.4321	42.6932	ECM1
anion homeostasis (GO:0055081)	0.0628803	1	0	0	15.4321	42.6932	LIPG
negative regulation of protein dephosphorylation (GO:0035308)	0.0628803	1	0	0	15.4321	42.6932	PPP1R15A
DNA ligation (GO:0006266)	0.0628803	1	0	0	15.4321	42.6932	POLD4
positive regulation of developmental process (GO:0051094)	0.0636086	1	0	0	4.87329	13.426	SERPINF2;JUNB
positive regulation of programmed cell death (GO:0043068)	0.0661605	1	0	0	3.22997	8.77155	IL6;GADD45B;GADD45G
striated muscle cell differentiation (GO:0051146)	0.066257	1	0	0	14.6199	39.6815	SIK1
positive regulation of adherens junction organization (GO:1903393)	0.066257	1	0	0	14.6199	39.6815	COL16A1
negative regulation of protein localization to plasma membrane (GO:1903077)	0.066257	1	0	0	14.6199	39.6815	PKDCC
positive regulation of immunoglobulin production (GO:0002639)	0.066257	1	0	0	14.6199	39.6815	IL6
regulation of transcription factor import into nucleus (GO:0042990)	0.066257	1	0	0	14.6199	39.6815	DMAP1
regulation of platelet activation (GO:0010543)	0.066257	1	0	0	14.6199	39.6815	THBD
positive regulation of STAT cascade (GO:1904894)	0.066257	1	0	0	14.6199	39.6815	IL6
endothelial cell development (GO:0001885)	0.066257	1	0	0	14.6199	39.6815	STC1
regulation of myotube differentiation (GO:0010830)	0.066257	1	0	0	14.6199	39.6815	SIK1
activation of MAPK activity (GO:0000187)	0.0675561	1	0	0	4.7081	12.6874	SAA1;CCL19
positive regulation of B cell activation (GO:0050871)	0.0695598	1	0	0	4.62963	12.3406	IGHM;IL6
regulation of endoplasmic reticulum stress-induced intrinsic apoptotic signaling pathway (GO:1902235)	0.0696217	1	0	0	13.8889	37.0094	CREB3L1
regulation of anoikis (GO:2000209)	0.0696217	1	0	0	13.8889	37.0094	SIK1
negative regulation of macromolecule biosynthetic process (GO:0010558)	0.0696217	1	0	0	13.8889	37.0094	IL6
entrainment of circadian clock by photoperiod (GO:0043153)	0.0696217	1	0	0	13.8889	37.0094	SIK1
inactivation of MAPK activity (GO:0000188)	0.0696217	1	0	0	13.8889	37.0094	DUSP2
embryonic digestive tract development (GO:0048566)	0.0696217	1	0	0	13.8889	37.0094	PKDCC
dorsal/ventral pattern formation (GO:0009953)	0.0696217	1	0	0	13.8889	37.0094	MDFI
regulation of cholesterol transport (GO:0032374)	0.0696217	1	0	0	13.8889	37.0094	LIPG
negative regulation of cell migration (GO:0030336)	0.071583	1	0	0	4.55373	12.0077	STC1;TIMP1
negative regulation of transcription, DNA-templated (GO:0045892)	0.072562	1	0	0	2.0475	5.37124	NR4A3;ARID5A;DMAP1;JUNB;MDFI;ATF3
regulation of cardiac muscle hypertrophy (GO:0010611)	0.0729744	1	0	0	13.2275	34.625	NR4A3
positive regulation of cellular component movement (GO:0051272)	0.0729744	1	0	0	13.2275	34.625	CCL19
dendritic cell differentiation (GO:0097028)	0.0729744	1	0	0	13.2275	34.625	CCL19
positive regulation of translational initiation (GO:0045948)	0.0729744	1	0	0	13.2275	34.625	PPP1R15A
photoperiodism (GO:0009648)	0.0729744	1	0	0	13.2275	34.625	SIK1
positive regulation of leukocyte cell-cell adhesion (GO:1903039)	0.0729744	1	0	0	13.2275	34.625	NR4A3
negative regulation of cytokine biosynthetic process (GO:0042036)	0.0729744	1	0	0	13.2275	34.625	IL6
ERK1 and ERK2 cascade (GO:0070371)	0.0729744	1	0	0	13.2275	34.625	PTGER4
ventricular cardiac muscle tissue development (GO:0003229)	0.0729744	1	0	0	13.2275	34.625	TNNC1
cellular calcium ion homeostasis (GO:0006874)	0.0736254	1	0	0	4.48029	11.688	STC1;CCL19
protein dephosphorylation (GO:0006470)	0.0756865	1	0	0	4.40917	11.3808	PPP1R15A;DUSP2
negative regulation of multicellular organismal process (GO:0051241)	0.0756865	1	0	0	4.40917	11.3808	STC1;TIMP1
negative regulation of response to endoplasmic reticulum stress (GO:1903573)	0.0763152	1	0	0	12.6263	32.4859	CREB3L1
regulation of interferon-gamma-mediated signaling pathway (GO:0060334)	0.0763152	1	0	0	12.6263	32.4859	SOCS3
regulation of calcium ion import (GO:0090279)	0.0763152	1	0	0	12.6263	32.4859	STC1
regulation of bone resorption (GO:0045124)	0.0763152	1	0	0	12.6263	32.4859	IL6
NAD biosynthetic process (GO:0009435)	0.0763152	1	0	0	12.6263	32.4859	NMNAT3
positive regulation of phosphatase activity (GO:0010922)	0.0763152	1	0	0	12.6263	32.4859	PPP1R15A
early endosome to late endosome transport (GO:0045022)	0.0763152	1	0	0	12.6263	32.4859	WDR91
cellular response to catecholamine stimulus (GO:0071870)	0.0796441	1	0	0	12.0773	30.5578	NR4A3
nucleotide-excision repair, DNA gap filling (GO:0006297)	0.0796441	1	0	0	12.0773	30.5578	POLD4
negative regulation of transcription factor import into nucleus (GO:0042992)	0.0796441	1	0	0	12.0773	30.5578	MDFI
vesicle-mediated transport between endosomal compartments (GO:0098927)	0.0796441	1	0	0	12.0773	30.5578	WDR91
positive regulation of cell junction assembly (GO:1901890)	0.0796441	1	0	0	12.0773	30.5578	COL16A1
NAD metabolic process (GO:0019674)	0.0796441	1	0	0	12.0773	30.5578	NMNAT3
regulation of chondrocyte differentiation (GO:0032330)	0.0796441	1	0	0	12.0773	30.5578	PKDCC
positive regulation of cell cycle G1/S phase transition (GO:1902808)	0.0829612	1	0	0	11.5741	28.8123	PAGR1
positive regulation of cytosolic calcium ion concentration (GO:0007204)	0.0841111	1	0	0	4.14594	10.2638	PTGER4;SAA1
cellular response to organic substance (GO:0071310)	0.0841111	1	0	0	4.14594	10.2638	SIK1;JUNB
intrinsic apoptotic signaling pathway in response to endoplasmic reticulum stress (GO:0070059)	0.0862665	1	0	0	11.1111	27.2257	PPP1R15A
positive regulation of neutrophil chemotaxis (GO:0090023)	0.0862665	1	0	0	11.1111	27.2257	CCL19
cellular lipid catabolic process (GO:0044242)	0.0862665	1	0	0	11.1111	27.2257	LIPG
regulation of chromosome organization (GO:0033044)	0.0862665	1	0	0	11.1111	27.2257	CDT1
response to glucocorticoid (GO:0051384)	0.0862665	1	0	0	11.1111	27.2257	IL6
regulation of chemotaxis (GO:0050920)	0.0862665	1	0	0	11.1111	27.2257	CCL19
negative regulation of sequestering of calcium ion (GO:0051283)	0.0862665	1	0	0	11.1111	27.2257	CCL19
regulation of actin filament bundle assembly (GO:0032231)	0.0862665	1	0	0	11.1111	27.2257	PTGER4
regulation of cell cycle G1/S phase transition (GO:1902806)	0.0862665	1	0	0	11.1111	27.2257	PAGR1
positive regulation of MAPK cascade (GO:0043410)	0.0868874	1	0	0	2.87356	7.02052	IL6;SERPINF2;CCL19
regulation of cytosolic calcium ion concentration (GO:0051480)	0.0884265	1	0	0	4.02576	9.76483	PTGER4;SAA1
response to cytokine (GO:0034097)	0.0895157	1	0	0	3.9968	9.64565	TIMP1;JUNB
negative regulation of wound healing (GO:0061045)	0.08956	1	0	0	10.6838	25.7783	THBD
response to alcohol (GO:0097305)	0.08956	1	0	0	10.6838	25.7783	CCL19
positive regulation of phosphatidylinositol 3-kinase activity (GO:0043552)	0.08956	1	0	0	10.6838	25.7783	CCL19
negative regulation of insulin receptor signaling pathway (GO:0046627)	0.08956	1	0	0	10.6838	25.7783	SOCS3
positive regulation of glucose transport (GO:0010828)	0.08956	1	0	0	10.6838	25.7783	NR4A3
regulation of glucose metabolic process (GO:0010906)	0.08956	1	0	0	10.6838	25.7783	DGKQ
positive regulation of interleukin-1 beta secretion (GO:0050718)	0.08956	1	0	0	10.6838	25.7783	CCL19
positive regulation of neutrophil migration (GO:1902624)	0.08956	1	0	0	10.6838	25.7783	CCL19
peptide hormone secretion (GO:0030072)	0.08956	1	0	0	10.6838	25.7783	IL6
positive regulation of interleukin-12 production (GO:0032735)	0.08956	1	0	0	10.6838	25.7783	CCL19
negative regulation of cellular protein localization (GO:1903828)	0.08956	1	0	0	10.6838	25.7783	CDT1
cellular response to growth factor stimulus (GO:0071363)	0.0906089	1	0	0	3.96825	9.52858	NR4A1;EGR3
regulation of transcription involved in G1/S transition of mitotic cell cycle (GO:0000083)	0.0928419	1	0	0	10.2881	24.4533	CDT1
negative regulation of cellular response to insulin stimulus (GO:1900077)	0.0928419	1	0	0	10.2881	24.4533	SOCS3
regulation of NF-kappaB import into nucleus (GO:0042345)	0.0928419	1	0	0	10.2881	24.4533	CCL19
positive regulation of granulocyte chemotaxis (GO:0071624)	0.0928419	1	0	0	10.2881	24.4533	CCL19
response to ketone (GO:1901654)	0.0928419	1	0	0	10.2881	24.4533	CCL19
regulation of cardiac muscle cell contraction (GO:0086004)	0.0928419	1	0	0	10.2881	24.4533	STC1
regulation of muscle contraction (GO:0006937)	0.0928419	1	0	0	10.2881	24.4533	TNNC1
lipid modification (GO:0030258)	0.0928419	1	0	0	10.2881	24.4533	DGKQ
negative regulation of catalytic activity (GO:0043086)	0.0928419	1	0	0	10.2881	24.4533	TIMP1
positive regulation of intracellular signal transduction (GO:1902533)	0.0946901	1	0	0	2.31481	5.45636	ECM1;IL6;S100A4;CCL19
negative regulation of peptidyl-tyrosine phosphorylation (GO:0050732)	0.096112	1	0	0	9.92063	23.2365	SOCS3
positive regulation of lipid kinase activity (GO:0090218)	0.096112	1	0	0	9.92063	23.2365	CCL19
regulation of vascular endothelial growth factor production (GO:0010574)	0.096112	1	0	0	9.92063	23.2365	IL6
release of sequestered calcium ion into cytosol (GO:0051209)	0.096112	1	0	0	9.92063	23.2365	CCL19
regulation of blood vessel diameter (GO:0097746)	0.096112	1	0	0	9.92063	23.2365	SERPINF2
muscle fiber development (GO:0048747)	0.096112	1	0	0	9.92063	23.2365	C11ORF88
regulation of protein transport (GO:0051223)	0.096112	1	0	0	9.92063	23.2365	SAA1
transcription from RNA polymerase II promoter (GO:0006366)	0.0979886	1	0	0	2.28624	5.31071	FOSL1;NR4A1;NR4A3;MAFF
skeletal system development (GO:0001501)	0.0983703	1	0	0	3.77929	8.76423	PTGER4;STC1
regulation of vasculature development (GO:1901342)	0.0993706	1	0	0	9.57854	22.1159	IL6
negative regulation of endocytosis (GO:0045806)	0.0993706	1	0	0	9.57854	22.1159	PACSIN3
positive regulation of phospholipid metabolic process (GO:1903727)	0.0993706	1	0	0	9.57854	22.1159	CCL19
regulation of TORC1 signaling (GO:1903432)	0.0993706	1	0	0	9.57854	22.1159	DGKQ
cellular response to ketone (GO:1901655)	0.0993706	1	0	0	9.57854	22.1159	PTGER4
cellular response to hydrogen peroxide (GO:0070301)	0.0993706	1	0	0	9.57854	22.1159	IL6
cellular response to alcohol (GO:0097306)	0.0993706	1	0	0	9.57854	22.1159	PTGER4
negative regulation of homeostatic process (GO:0032845)	0.0993706	1	0	0	9.57854	22.1159	IL6
collagen fibril organization (GO:0030199)	0.102618	1	0	0	9.25926	21.081	SERPINF2
regulation of neutrophil chemotaxis (GO:0090022)	0.102618	1	0	0	9.25926	21.081	CCL19
regulation of intracellular estrogen receptor signaling pathway (GO:0033146)	0.105853	1	0	0	8.96057	20.1228	PAGR1
regulation of leukocyte chemotaxis (GO:0002688)	0.105853	1	0	0	8.96057	20.1228	IL6
regulation of blood coagulation (GO:0030193)	0.105853	1	0	0	8.96057	20.1228	THBD
activation of JUN kinase activity (GO:0007257)	0.105853	1	0	0	8.96057	20.1228	CCL19
response to lipopolysaccharide (GO:0032496)	0.108614	1	0	0	3.56125	7.90584	IL6;JUNB
positive regulation of interleukin-1 beta production (GO:0032731)	0.109077	1	0	0	8.68056	19.2335	CCL19
positive regulation of bone mineralization (GO:0030501)	0.109077	1	0	0	8.68056	19.2335	PKDCC
positive regulation of protein dephosphorylation (GO:0035307)	0.109077	1	0	0	8.68056	19.2335	PPP1R15A
ribonucleoprotein complex assembly (GO:0022618)	0.109769	1	0	0	3.53857	7.81804	PPAN-P2RY11;PPAN
mismatch repair (GO:0006298)	0.112289	1	0	0	8.41751	18.4064	POLD4
cyclic-nucleotide-mediated signaling (GO:0019935)	0.112289	1	0	0	8.41751	18.4064	DGKQ
negative regulation of fat cell differentiation (GO:0045599)	0.112289	1	0	0	8.41751	18.4064	IL6
positive regulation of tumor necrosis factor superfamily cytokine production (GO:1903557)	0.112289	1	0	0	8.41751	18.4064	CCL19
positive regulation of cellular biosynthetic process (GO:0031328)	0.113255	1	0	0	3.47222	7.5629	IL6;CCL19
transcription initiation from RNA polymerase II promoter (GO:0006367)	0.114423	1	0	0	3.45066	7.48051	NR4A1;NR4A3
positive regulation of cell-matrix adhesion (GO:0001954)	0.11549	1	0	0	8.16993	17.6354	COL16A1
positive regulation of biomineral tissue development (GO:0070169)	0.11549	1	0	0	8.16993	17.6354	PKDCC
positive regulation of locomotion (GO:0040017)	0.11549	1	0	0	8.16993	17.6354	CCL19
positive regulation of cell-cell adhesion (GO:0022409)	0.11549	1	0	0	8.16993	17.6354	SERPINF2
regulation of interleukin-12 production (GO:0032655)	0.11549	1	0	0	8.16993	17.6354	CCL19
positive regulation of calcium ion transport (GO:0051928)	0.11549	1	0	0	8.16993	17.6354	STC1
negative regulation of multi-organism process (GO:0043901)	0.11549	1	0	0	8.16993	17.6354	TIMP1
positive regulation of chemokine production (GO:0032722)	0.11868	1	0	0	7.93651	16.9153	IL6
regulation of interleukin-1 beta secretion (GO:0050706)	0.11868	1	0	0	7.93651	16.9153	CCL19
positive regulation of leukocyte migration (GO:0002687)	0.11868	1	0	0	7.93651	16.9153	IL6
negative regulation of DNA binding (GO:0043392)	0.11868	1	0	0	7.93651	16.9153	MDFI
ventricular cardiac muscle tissue morphogenesis (GO:0055010)	0.11868	1	0	0	7.93651	16.9153	TNNC1
regulation of insulin receptor signaling pathway (GO:0046626)	0.11868	1	0	0	7.93651	16.9153	SOCS3
negative regulation of endothelial cell migration (GO:0010596)	0.11868	1	0	0	7.93651	16.9153	STC1
regulation of transcription, DNA-templated (GO:0006355)	0.119308	1	0	0	1.56348	3.32403	FOSL1;CDT1;IL6;DGKQ;ARID5A;DMAP1;JUNB;MDFI;ATF3
regulation of inflammatory response (GO:0050727)	0.121498	1	0	0	3.32668	7.01216	PTGER4;SAA1
lipid phosphorylation (GO:0046834)	0.121858	1	0	0	7.71605	16.2415	DGKQ
regulation of cyclin-dependent protein kinase activity (GO:1904029)	0.121858	1	0	0	7.71605	16.2415	SERTAD1
regulation of phosphoprotein phosphatase activity (GO:0043666)	0.121858	1	0	0	7.71605	16.2415	PPP1R15A
antibacterial humoral response (GO:0019731)	0.121858	1	0	0	7.71605	16.2415	IGHM
regulation of cardiac muscle contraction (GO:0055117)	0.121858	1	0	0	7.71605	16.2415	STC1
anatomical structure homeostasis (GO:0060249)	0.121858	1	0	0	7.71605	16.2415	POLD4
positive regulation of DNA replication (GO:0045740)	0.121858	1	0	0	7.71605	16.2415	CDT1
negative regulation of protein complex assembly (GO:0031333)	0.121858	1	0	0	7.71605	16.2415	PTGER4
negative regulation of epithelial cell migration (GO:0010633)	0.121858	1	0	0	7.71605	16.2415	STC1
positive regulation of osteoblast differentiation (GO:0045669)	0.121858	1	0	0	7.71605	16.2415	IL6
protein kinase B signaling (GO:0043491)	0.121858	1	0	0	7.71605	16.2415	NR4A1
regulation of sodium ion transport (GO:0002028)	0.121858	1	0	0	7.71605	16.2415	SIK1
regulation of receptor-mediated endocytosis (GO:0048259)	0.125025	1	0	0	7.50751	15.6099	CCL19
calcium ion transmembrane import into cytosol (GO:0097553)	0.125025	1	0	0	7.50751	15.6099	CCL19
cardiac muscle tissue development (GO:0048738)	0.125025	1	0	0	7.50751	15.6099	SIK1
regulation of blood circulation (GO:1903522)	0.125025	1	0	0	7.50751	15.6099	HSPB7
plasma membrane organization (GO:0007009)	0.125025	1	0	0	7.50751	15.6099	PACSIN3
acylglycerol metabolic process (GO:0006639)	0.125025	1	0	0	7.50751	15.6099	DGKQ
cardiac muscle contraction (GO:0060048)	0.125025	1	0	0	7.50751	15.6099	TNNC1
endoderm formation (GO:0001706)	0.125025	1	0	0	7.50751	15.6099	DUSP2
cardiac muscle tissue morphogenesis (GO:0055008)	0.125025	1	0	0	7.50751	15.6099	TNNC1
regulation of metal ion transport (GO:0010959)	0.128181	1	0	0	7.30994	15.0169	SIK1
regulation of peptidyl-threonine phosphorylation (GO:0010799)	0.128181	1	0	0	7.30994	15.0169	DGKQ
positive regulation of stress fiber assembly (GO:0051496)	0.128181	1	0	0	7.30994	15.0169	SERPINF2
epithelial to mesenchymal transition (GO:0001837)	0.128181	1	0	0	7.30994	15.0169	S100A4
nucleotide-excision repair, DNA incision, 5'-to lesion (GO:0006296)	0.128181	1	0	0	7.30994	15.0169	POLD4
myelination (GO:0042552)	0.128181	1	0	0	7.30994	15.0169	MPZ
muscle filament sliding (GO:0030049)	0.131326	1	0	0	7.12251	14.4592	TNNC1
actin-myosin filament sliding (GO:0033275)	0.131326	1	0	0	7.12251	14.4592	TNNC1
negative regulation of protein catabolic process (GO:0042177)	0.134459	1	0	0	6.94444	13.934	TIMP1
skeletal muscle tissue development (GO:0007519)	0.134459	1	0	0	6.94444	13.934	C11ORF88
DNA biosynthetic process (GO:0071897)	0.134459	1	0	0	6.94444	13.934	POLD4
regulation of ATPase activity (GO:0043462)	0.137581	1	0	0	6.77507	13.4386	TNNC1
negative regulation of transport (GO:0051051)	0.137581	1	0	0	6.77507	13.4386	PACSIN3
nucleotide-excision repair, DNA incision (GO:0033683)	0.137581	1	0	0	6.77507	13.4386	POLD4
phosphatidic acid biosynthetic process (GO:0006654)	0.137581	1	0	0	6.77507	13.4386	DGKQ
negative regulation of cytokine-mediated signaling pathway (GO:0001960)	0.137581	1	0	0	6.77507	13.4386	IL6
regulation of protein dephosphorylation (GO:0035304)	0.137581	1	0	0	6.77507	13.4386	PPP1R15A
negative regulation of cytokine secretion (GO:0050710)	0.137581	1	0	0	6.77507	13.4386	PTGER4
mesenchymal cell differentiation (GO:0048762)	0.140692	1	0	0	6.61376	12.9708	S100A4
regulation of cholesterol metabolic process (GO:0090181)	0.140692	1	0	0	6.61376	12.9708	DGKQ
phosphatidic acid metabolic process (GO:0046473)	0.140692	1	0	0	6.61376	12.9708	DGKQ
regulation of protein localization (GO:0032880)	0.140692	1	0	0	6.61376	12.9708	PLEKHM2
negative regulation of STAT cascade (GO:1904893)	0.140692	1	0	0	6.61376	12.9708	SOCS3
telomere organization (GO:0032200)	0.140692	1	0	0	6.61376	12.9708	POLD4
positive regulation of receptor-mediated endocytosis (GO:0048260)	0.140692	1	0	0	6.61376	12.9708	CCL19
negative regulation of protein secretion (GO:0050709)	0.143792	1	0	0	6.45995	12.5283	PTGER4
regulation of interleukin-6 production (GO:0032675)	0.143792	1	0	0	6.45995	12.5283	IL6
regulation of protein modification process (GO:0031399)	0.143792	1	0	0	6.45995	12.5283	ASPSCR1
translesion synthesis (GO:0019985)	0.143792	1	0	0	6.45995	12.5283	POLD4
DNA-templated transcription, initiation (GO:0006352)	0.145803	1	0	0	2.97089	5.72044	NR4A1;NR4A3
cardiac ventricle morphogenesis (GO:0003208)	0.146881	1	0	0	6.31313	12.1094	TNNC1
mitotic metaphase plate congression (GO:0007080)	0.146881	1	0	0	6.31313	12.1094	CDT1
response to unfolded protein (GO:0006986)	0.146881	1	0	0	6.31313	12.1094	HSPB7
response to hydrogen peroxide (GO:0042542)	0.146881	1	0	0	6.31313	12.1094	IL6
positive regulation of interleukin-6 production (GO:0032755)	0.146881	1	0	0	6.31313	12.1094	IL6
digestive tract development (GO:0048565)	0.146881	1	0	0	6.31313	12.1094	PKDCC
receptor-mediated endocytosis (GO:0006898)	0.148287	1	0	0	2.93945	5.61024	STAB1;SAA1
heart contraction (GO:0060047)	0.149959	1	0	0	6.17284	11.7123	TNNC1
regulation of steroid biosynthetic process (GO:0050810)	0.149959	1	0	0	6.17284	11.7123	DGKQ
regulation of focal adhesion assembly (GO:0051893)	0.149959	1	0	0	6.17284	11.7123	COL16A1
cholesterol transport (GO:0030301)	0.149959	1	0	0	6.17284	11.7123	LIPG
positive regulation of actin filament bundle assembly (GO:0032233)	0.149959	1	0	0	6.17284	11.7123	SERPINF2
protein N-linked glycosylation via asparagine (GO:0018279)	0.149959	1	0	0	6.17284	11.7123	NUDT14
cellular protein modification process (GO:0006464)	0.151492	1	0	0	1.66334	3.13909	SOCS3;SPSB2;DUSP2;IL6;SIK1;TIMP1
peptidyl-asparagine modification (GO:0018196)	0.153026	1	0	0	6.03865	11.3354	NUDT14
nicotinamide nucleotide metabolic process (GO:0046496)	0.153026	1	0	0	6.03865	11.3354	NMNAT3
negative regulation of ossification (GO:0030279)	0.153026	1	0	0	6.03865	11.3354	ECM1
negative regulation of cellular biosynthetic process (GO:0031327)	0.159128	1	0	0	5.78704	10.6369	SIK1
positive regulation of tumor necrosis factor production (GO:0032760)	0.159128	1	0	0	5.78704	10.6369	CCL19
postreplication repair (GO:0006301)	0.159128	1	0	0	5.78704	10.6369	POLD4
negative regulation of JAK-STAT cascade (GO:0046426)	0.159128	1	0	0	5.78704	10.6369	SOCS3
histone H4 acetylation (GO:0043967)	0.159128	1	0	0	5.78704	10.6369	DMAP1
negative regulation of mitotic cell cycle (GO:0045930)	0.162162	1	0	0	5.66893	10.3127	CDT1
cellular response to mechanical stimulus (GO:0071260)	0.162162	1	0	0	5.66893	10.3127	PTGER4
positive regulation of ERK1 and ERK2 cascade (GO:0070374)	0.16464	1	0	0	2.75028	4.96148	SERPINF2;CCL19
regulation of megakaryocyte differentiation (GO:0045652)	0.165186	1	0	0	5.55556	10.0038	NR4A3
lipid homeostasis (GO:0055088)	0.165186	1	0	0	5.55556	10.0038	LIPG
regulation of ion transport (GO:0043269)	0.168199	1	0	0	5.44662	9.70921	STC1
regulation of cellular protein metabolic process (GO:0032268)	0.168199	1	0	0	5.44662	9.70921	WDR91
myeloid leukocyte differentiation (GO:0002573)	0.168199	1	0	0	5.44662	9.70921	CCL19
positive regulation of JUN kinase activity (GO:0043507)	0.168199	1	0	0	5.44662	9.70921	CCL19
peptidyl-tyrosine modification (GO:0018212)	0.171201	1	0	0	5.34188	9.42798	PKDCC
response to organonitrogen compound (GO:0010243)	0.171201	1	0	0	5.34188	9.42798	IL6
telomere maintenance (GO:0000723)	0.171201	1	0	0	5.34188	9.42798	POLD4
positive regulation of proteolysis (GO:0045862)	0.174192	1	0	0	5.24109	9.15931	PACSIN3
chemokine-mediated signaling pathway (GO:0070098)	0.174192	1	0	0	5.24109	9.15931	CCL19
embryonic organ development (GO:0048568)	0.177173	1	0	0	5.14403	8.90241	PKDCC
sensory perception (GO:0007600)	0.180143	1	0	0	5.05051	8.65658	TRPV2
negative regulation of cellular component organization (GO:0051129)	0.180143	1	0	0	5.05051	8.65658	PACSIN3
regulation of cellular catabolic process (GO:0031329)	0.183103	1	0	0	4.96032	8.42117	WDR91
negative regulation of gene expression (GO:0010629)	0.183523	1	0	0	1.79501	3.04329	DGKQ;ARID5A;DMAP1;MDFI
chromosome organization (GO:0051276)	0.186052	1	0	0	4.87329	8.19556	CDT1
DNA-dependent DNA replication (GO:0006261)	0.186052	1	0	0	4.87329	8.19556	POLD4
cellular defense response (GO:0006968)	0.186052	1	0	0	4.87329	8.19556	FOSL1
negative regulation of cellular catabolic process (GO:0031330)	0.186052	1	0	0	4.87329	8.19556	TIMP1
positive regulation of protein phosphorylation (GO:0001934)	0.186247	1	0	0	2.01776	3.3912	IL6;DGKQ;CCL19
cellular respiration (GO:0045333)	0.18899	1	0	0	4.78927	7.97921	NR4A3
cholesterol homeostasis (GO:0042632)	0.191919	1	0	0	4.7081	7.77158	LIPG
sterol homeostasis (GO:0055092)	0.191919	1	0	0	4.7081	7.77158	LIPG
integrin-mediated signaling pathway (GO:0007229)	0.191919	1	0	0	4.7081	7.77158	COL16A1
response to reactive oxygen species (GO:0000302)	0.197744	1	0	0	4.55373	7.38062	CCL19
muscle organ development (GO:0007517)	0.197744	1	0	0	4.55373	7.38062	EGR3
positive regulation of leukocyte chemotaxis (GO:0002690)	0.200641	1	0	0	4.48029	7.19642	IL6
striated muscle contraction (GO:0006941)	0.200641	1	0	0	4.48029	7.19642	TNNC1
regulation of tumor necrosis factor production (GO:0032680)	0.200641	1	0	0	4.48029	7.19642	CCL19
positive regulation of cellular amide metabolic process (GO:0034250)	0.200641	1	0	0	4.48029	7.19642	IL6
negative regulation of MAP kinase activity (GO:0043407)	0.200641	1	0	0	4.48029	7.19642	DUSP2
stress-activated MAPK cascade (GO:0051403)	0.203527	1	0	0	4.40917	7.01921	PTGER4
negative regulation of intrinsic apoptotic signaling pathway (GO:2001243)	0.203527	1	0	0	4.40917	7.01921	CREB3L1
regulation of signal transduction (GO:0009966)	0.206068	1	0	0	2.37417	3.75011	DGKQ;TIMP1
negative regulation of protein modification process (GO:0031400)	0.206404	1	0	0	4.34028	6.84862	PPP1R15A
negative regulation of dephosphorylation (GO:0035305)	0.206404	1	0	0	4.34028	6.84862	PPP1R15A
positive regulation of endocytosis (GO:0045807)	0.20927	1	0	0	4.2735	6.68432	CCL19
positive regulation of cell adhesion (GO:0045785)	0.20927	1	0	0	4.2735	6.68432	SAA1
cellular response to reactive oxygen species (GO:0034614)	0.212126	1	0	0	4.20875	6.526	IL6
defense response to Gram-positive bacterium (GO:0050830)	0.212126	1	0	0	4.20875	6.526	IL6
DNA synthesis involved in DNA repair (GO:0000731)	0.212126	1	0	0	4.20875	6.526	POLD4
negative regulation of blood vessel morphogenesis (GO:2000181)	0.212126	1	0	0	4.20875	6.526	STAB1
regulation of myeloid cell differentiation (GO:0045637)	0.212126	1	0	0	4.20875	6.526	NR4A3
positive regulation of cellular protein localization (GO:1903829)	0.214971	1	0	0	4.14594	6.37335	CDT1
negative regulation of nucleic acid-templated transcription (GO:1903507)	0.215782	1	0	0	1.87266	2.8717	ARID5A;DMAP1;MDFI
regulation of cyclin-dependent protein serine/threonine kinase activity (GO:0000079)	0.217807	1	0	0	4.08497	6.22609	SERTAD1
regulation of TOR signaling (GO:0032006)	0.217807	1	0	0	4.08497	6.22609	DGKQ
negative regulation of phosphatase activity (GO:0010923)	0.220632	1	0	0	4.02576	6.08397	PPP1R15A
response to interferon-gamma (GO:0034341)	0.220632	1	0	0	4.02576	6.08397	CCL19
negative regulation of angiogenesis (GO:0016525)	0.223448	1	0	0	3.96825	5.94674	STAB1
regulation of endothelial cell migration (GO:0010594)	0.223448	1	0	0	3.96825	5.94674	STC1
regulation of osteoblast differentiation (GO:0045667)	0.223448	1	0	0	3.96825	5.94674	IL6
positive regulation of plasma membrane bounded cell projection assembly (GO:0120034)	0.223448	1	0	0	3.96825	5.94674	CCL19
regulation of ERK1 and ERK2 cascade (GO:0070372)	0.224553	1	0	0	2.24014	3.34597	SERPINF2;CCL19
phospholipid metabolic process (GO:0006644)	0.226253	1	0	0	3.91236	5.81417	LIPG
negative regulation of developmental process (GO:0051093)	0.226253	1	0	0	3.91236	5.81417	TIMP1
protein ubiquitination involved in ubiquitin-dependent protein catabolic process (GO:0042787)	0.226253	1	0	0	3.91236	5.81417	SPSB2
regulation of cell communication (GO:0010646)	0.229049	1	0	0	3.85802	5.68604	SCG5
histone acetylation (GO:0016573)	0.229049	1	0	0	3.85802	5.68604	DMAP1
negative regulation of cell cycle (GO:0045786)	0.231834	1	0	0	3.80518	5.56215	NR4A1
regulation of fat cell differentiation (GO:0045598)	0.231834	1	0	0	3.80518	5.56215	IL6
protein N-linked glycosylation (GO:0006487)	0.23461	1	0	0	3.75375	5.44231	NUDT14
nucleic acid phosphodiester bond hydrolysis (GO:0090305)	0.23461	1	0	0	3.75375	5.44231	POLD4
transcription-coupled nucleotide-excision repair (GO:0006283)	0.23461	1	0	0	3.75375	5.44231	POLD4
regulation of protein complex assembly (GO:0043254)	0.23461	1	0	0	3.75375	5.44231	CDT1
positive regulation of defense response (GO:0031349)	0.237375	1	0	0	3.7037	5.32635	PTGER4
regulation of G-protein coupled receptor protein signaling pathway (GO:0008277)	0.237375	1	0	0	3.7037	5.32635	DGKQ
protein phosphorylation (GO:0006468)	0.24048	1	0	0	1.76929	2.52144	PKDCC;DGKQ;SIK1
response to interleukin-1 (GO:0070555)	0.242877	1	0	0	3.6075	5.10534	CCL19
water-soluble vitamin metabolic process (GO:0006767)	0.245613	1	0	0	3.56125	4.99999	ACP5
endocytosis (GO:0006897)	0.245832	1	0	0	2.10438	2.95267	STAB1;SAA1
adenylate cyclase-activating G-protein coupled receptor signaling pathway (GO:0007189)	0.24834	1	0	0	3.51617	4.89788	PTGER4
extracellular matrix disassembly (GO:0022617)	0.24834	1	0	0	3.51617	4.89788	TIMP1
positive regulation of translation (GO:0045727)	0.24834	1	0	0	3.51617	4.89788	IL6
peptidyl-tyrosine phosphorylation (GO:0018108)	0.251056	1	0	0	3.47222	4.79888	PKDCC
regulation of hydrolase activity (GO:0051336)	0.253763	1	0	0	3.42936	4.70286	TNNC1
regulation of protein serine/threonine kinase activity (GO:0071900)	0.253763	1	0	0	3.42936	4.70286	SERTAD1
cellular protein metabolic process (GO:0044267)	0.253981	1	0	0	1.71821	2.35481	IL6;SAA1;TIMP1
positive regulation of binding (GO:0051099)	0.256461	1	0	0	3.38753	4.60969	CDT1
negative regulation of cell cycle process (GO:0010948)	0.256461	1	0	0	3.38753	4.60969	CDT1
positive regulation of protein catabolic process (GO:0045732)	0.256461	1	0	0	3.38753	4.60969	PACSIN3
regulation of anatomical structure morphogenesis (GO:0022603)	0.259148	1	0	0	3.34672	4.51926	IL6
negative regulation of binding (GO:0051100)	0.259148	1	0	0	3.34672	4.51926	MDFI
cellular response to oxygen-containing compound (GO:1901701)	0.260514	1	0	0	2.0202	2.71737	IL6;NR4A3
positive regulation of peptidyl-serine phosphorylation (GO:0033138)	0.261827	1	0	0	3.30688	4.43146	IL6
positive regulation of macromolecule metabolic process (GO:0010604)	0.263186	1	0	0	2.00562	2.67729	IL6;DGKQ
cellular response to molecule of bacterial origin (GO:0071219)	0.264495	1	0	0	3.26797	4.34618	IL6
regulation of peptidyl-serine phosphorylation (GO:0033135)	0.269804	1	0	0	3.19285	4.18282	IL6
calcium ion transmembrane transport (GO:0070588)	0.269804	1	0	0	3.19285	4.18282	TRPV2
positive regulation of cellular component biogenesis (GO:0044089)	0.272444	1	0	0	3.15657	4.10455	CDT1
negative regulation of signal transduction (GO:0009968)	0.272538	1	0	0	1.95618	2.54299	SOCS3;MDFI
T cell activation (GO:0042110)	0.275075	1	0	0	3.1211	4.02844	CCL19
regulation of cytokine-mediated signaling pathway (GO:0001959)	0.280308	1	0	0	3.0525	3.88237	SOCS3
negative regulation of cellular macromolecule biosynthetic process (GO:2000113)	0.281297	1	0	0	1.62443	2.06034	ARID5A;DMAP1;MDFI
regulation of protein catabolic process (GO:0042176)	0.282911	1	0	0	3.01932	3.81227	WDR91
cellular response to lipopolysaccharide (GO:0071222)	0.282911	1	0	0	3.01932	3.81227	IL6
cell cycle G1/S phase transition (GO:0044843)	0.285505	1	0	0	2.98686	3.74402	CDT1
regulation of transcription from RNA polymerase II promoter in response to stress (GO:0043618)	0.288089	1	0	0	2.95508	3.67756	ATF3
regulation of heart contraction (GO:0008016)	0.293229	1	0	0	2.89352	3.54977	HSPB7
regulation of cell death (GO:0010941)	0.295786	1	0	0	2.86369	3.48831	JUNB
negative regulation of cell motility (GO:2000146)	0.298334	1	0	0	2.83447	3.42841	STC1
antigen processing and presentation of exogenous peptide antigen (GO:0002478)	0.298334	1	0	0	2.83447	3.42841	LAG3
protein localization to organelle (GO:0033365)	0.298334	1	0	0	2.83447	3.42841	PPP1R15A
antigen processing and presentation of exogenous peptide antigen via MHC class II (GO:0019886)	0.298334	1	0	0	2.83447	3.42841	LAG3
response to tumor necrosis factor (GO:0034612)	0.298334	1	0	0	2.83447	3.42841	CCL19
antigen processing and presentation of peptide antigen via MHC class II (GO:0002495)	0.300872	1	0	0	2.80584	3.37001	LAG3
negative regulation of cellular process (GO:0048523)	0.302962	1	0	0	1.55763	1.86004	NR4A1;IL6;PKDCC
intrinsic apoptotic signaling pathway (GO:0097193)	0.308433	1	0	0	2.72331	3.2033	PPP1R15A
positive regulation of angiogenesis (GO:0045766)	0.313429	1	0	0	2.67094	3.09878	ECM1
plasma membrane invagination (GO:0099024)	0.313429	1	0	0	2.67094	3.09878	IGHM
positive regulation of vasculature development (GO:1904018)	0.315914	1	0	0	2.6455	3.04838	ECM1
B cell receptor signaling pathway (GO:0050853)	0.315914	1	0	0	2.6455	3.04838	IGHM
phagocytosis, engulfment (GO:0006911)	0.315914	1	0	0	2.6455	3.04838	IGHM
G1/S transition of mitotic cell cycle (GO:0000082)	0.318389	1	0	0	2.62055	2.99916	CDT1
positive regulation of cellular catabolic process (GO:0031331)	0.320856	1	0	0	2.59605	2.9511	PACSIN3
regulation of protein secretion (GO:0050708)	0.323314	1	0	0	2.57202	2.90414	SAA1
nucleotide-excision repair (GO:0006289)	0.325764	1	0	0	2.54842	2.85827	POLD4
negative regulation of hydrolase activity (GO:0051346)	0.325764	1	0	0	2.54842	2.85827	ECM1
regulation of cell motility (GO:2000145)	0.328204	1	0	0	2.52525	2.81343	CCL19
regulation of Wnt signaling pathway (GO:0030111)	0.328204	1	0	0	2.52525	2.81343	MDFI
negative regulation of cytokine production (GO:0001818)	0.330636	1	0	0	2.5025	2.76961	PTGER4
regulation of organelle organization (GO:0033043)	0.337879	1	0	0	2.43665	2.64392	CDT1
positive regulation of kinase activity (GO:0033674)	0.337879	1	0	0	2.43665	2.64392	CCL19
regulation of apoptotic process (GO:0042981)	0.33842	1	0	0	1.36166	1.47531	IL6;EGR3;GADD45B;GADD45G
cellular response to interferon-gamma (GO:0071346)	0.345046	1	0	0	2.37417	2.5263	CCL19
calcium ion transport (GO:0006816)	0.349781	1	0	0	2.33427	2.45203	TRPV2
cytosolic transport (GO:0016482)	0.349781	1	0	0	2.33427	2.45203	WDR91
plasma membrane bounded cell projection organization (GO:0120036)	0.349781	1	0	0	2.33427	2.45203	IL6
DNA replication (GO:0006260)	0.354482	1	0	0	2.29568	2.38085	POLD4
regulation of acute inflammatory response (GO:0002673)	0.35682	1	0	0	2.27687	2.34637	IL6
Golgi organization (GO:0007030)	0.35682	1	0	0	2.27687	2.34637	PLEKHM2
complement activation, classical pathway (GO:0006958)	0.361471	1	0	0	2.24014	2.27951	IGHM
dephosphorylation (GO:0016311)	0.363784	1	0	0	2.22222	2.2471	DUSP2
negative regulation of macromolecule metabolic process (GO:0010605)	0.363784	1	0	0	2.22222	2.2471	DGKQ
humoral immune response mediated by circulating immunoglobulin (GO:0002455)	0.366089	1	0	0	2.20459	2.21534	IGHM
G-protein coupled receptor signaling pathway, coupled to cyclic nucleotide second messenger (GO:0007187)	0.366089	1	0	0	2.20459	2.21534	PTGER4
cytoskeleton organization (GO:0007010)	0.368385	1	0	0	2.18723	2.18422	PACSIN3
transcription, DNA-templated (GO:0006351)	0.369006	1	0	0	1.55618	1.55142	FOSL1;MAFF
positive regulation of protein kinase B signaling (GO:0051897)	0.370674	1	0	0	2.17014	2.15372	CCL19
adenylate cyclase-modulating G-protein coupled receptor signaling pathway (GO:0007188)	0.386465	1	0	0	2.05761	1.9562	PTGER4
cellular response to organic cyclic compound (GO:0071407)	0.388688	1	0	0	2.04248	1.9301	NR4A3
Fc receptor mediated stimulatory signaling pathway (GO:0002431)	0.388688	1	0	0	2.04248	1.9301	NR4A3
phagocytosis (GO:0006909)	0.388688	1	0	0	2.04248	1.9301	IGHM
muscle contraction (GO:0006936)	0.393112	1	0	0	2.01288	1.87935	TNNC1
regulation of vesicle-mediated transport (GO:0060627)	0.395312	1	0	0	1.9984	1.85468	PACSIN3
inorganic cation transmembrane transport (GO:0098662)	0.399688	1	0	0	1.97006	1.80668	TRPV2
response to lipid (GO:0033993)	0.399688	1	0	0	1.97006	1.80668	JUNB
regulation of small GTPase mediated signal transduction (GO:0051056)	0.399688	1	0	0	1.97006	1.80668	ARHGAP22
regulation of cellular component organization (GO:0051128)	0.399688	1	0	0	1.97006	1.80668	PACSIN3
negative regulation of sequence-specific DNA binding transcription factor activity (GO:0043433)	0.399688	1	0	0	1.97006	1.80668	SIK1
cell-cell adhesion via plasma-membrane adhesion molecules (GO:0098742)	0.404033	1	0	0	1.9425	1.76041	MPZ
phosphorylation (GO:0016310)	0.407378	1	0	0	1.43554	1.28914	DGKQ;SIK1
neuron development (GO:0048666)	0.408348	1	0	0	1.91571	1.71578	IL6
peptidyl-serine phosphorylation (GO:0018105)	0.410493	1	0	0	1.90259	1.69406	DGKQ
regulation of protein kinase activity (GO:0045859)	0.414761	1	0	0	1.87688	1.65175	CCL19
cellular response to interleukin-1 (GO:0071347)	0.421106	1	0	0	1.83959	1.59101	CCL19
negative regulation of cell differentiation (GO:0045596)	0.421106	1	0	0	1.83959	1.59101	IL6
negative regulation of programmed cell death (GO:0043069)	0.434819	1	0	0	1.35833	1.13125	IL6;EGR3
positive regulation of protein modification process (GO:0031401)	0.447826	1	0	0	1.69377	1.36069	ASPSCR1
regulation of protein kinase B signaling (GO:0051896)	0.447826	1	0	0	1.69377	1.36069	CCL19
glycerophospholipid biosynthetic process (GO:0046474)	0.44983	1	0	0	1.6835	1.34492	DGKQ
regulation of mitotic cell cycle (GO:0007346)	0.451827	1	0	0	1.67336	1.32941	SIK1
neuron projection development (GO:0031175)	0.4558	1	0	0	1.65344	1.29911	IL6
peptidyl-serine modification (GO:0018209)	0.461706	1	0	0	1.62443	1.2554	DGKQ
positive regulation of protein kinase activity (GO:0045860)	0.465608	1	0	0	1.60565	1.22738	CCL19
positive regulation of hydrolase activity (GO:0051345)	0.465608	1	0	0	1.60565	1.22738	CCL19
negative regulation of Wnt signaling pathway (GO:0030178)	0.469482	1	0	0	1.5873	1.2002	MDFI
protein autophosphorylation (GO:0046777)	0.471409	1	0	0	1.57828	1.18691	SIK1
cellular response to lipid (GO:0071396)	0.477148	1	0	0	1.55183	1.14824	IL6
negative regulation of protein phosphorylation (GO:0001933)	0.477148	1	0	0	1.55183	1.14824	DGKQ
positive regulation of cell motility (GO:2000147)	0.479047	1	0	0	1.54321	1.13573	CCL19
Fc-epsilon receptor signaling pathway (GO:0038095)	0.484704	1	0	0	1.51791	1.0993	NR4A3
regulation of GTPase activity (GO:0043087)	0.495837	1	0	0	1.46972	1.03102	CCL19
protein complex assembly (GO:0006461)	0.49767	1	0	0	1.46199	1.0202	COL16A1
positive regulation of GTPase activity (GO:0043547)	0.503127	1	0	0	1.43926	0.988648	CCL19
cellular response to tumor necrosis factor (GO:0071356)	0.506733	1	0	0	1.4245	0.968335	CCL19
regulation of MAPK cascade (GO:0043408)	0.522643	1	0	0	1.36166	0.88352	IL6
negative regulation of apoptotic process (GO:0043066)	0.525207	1	0	0	1.14312	0.736125	IL6;EGR3
regulation of translation (GO:0006417)	0.539727	1	0	0	1.29803	0.800483	IL6
positive regulation of sequence-specific DNA binding transcription factor activity (GO:0051091)	0.543071	1	0	0	1.28601	0.785128	IL6
protein ubiquitination (GO:0016567)	0.548166	1	0	0	1.09577	0.658753	SPSB2;KLHDC8B
mitotic cell cycle phase transition (GO:0044772)	0.552959	1	0	0	1.25125	0.741331	CDT1
endosomal transport (GO:0016197)	0.565816	1	0	0	1.20773	0.687786	WDR91
apoptotic process (GO:0006915)	0.568973	1	0	0	1.19732	0.675195	PPP1R15A
proteasomal protein catabolic process (GO:0010498)	0.578308	1	0	0	1.16713	0.639179	SPSB2
anterograde trans-synaptic signaling (GO:0098916)	0.5829	1	0	0	1.1526	0.622106	MPZ
antigen receptor-mediated signaling pathway (GO:0050851)	0.608008	1	0	0	1.07666	0.535709	IGHM
MAPK cascade (GO:0000165)	0.636974	1	0	0	0.995619	0.44905	PTGER4
DNA repair (GO:0006281)	0.650015	1	0	0	0.961169	0.414032	POLD4
chemical synaptic transmission (GO:0007268)	0.651294	1	0	0	0.957854	0.410723	MPZ
proteasome-mediated ubiquitin-dependent protein catabolic process (GO:0043161)	0.653837	1	0	0	0.951294	0.404202	SPSB2
DNA metabolic process (GO:0006259)	0.681799	1	0	0	0.881834	0.33776	POLD4
regulation of cell migration (GO:0030334)	0.684123	1	0	0	0.876271	0.332648	STC1
protein transport (GO:0015031)	0.695491	1	0	0	0.849473	0.308475	SCG5
cellular protein localization (GO:0034613)	0.696606	1	0	0	0.846883	0.306178	SCG5
cellular response to DNA damage stimulus (GO:0006974)	0.698823	1	0	0	0.841751	0.301648	PPP1R15A
ubiquitin-dependent protein catabolic process (GO:0006511)	0.711792	1	0	0	0.812216	0.276128	SPSB2
intracellular protein transport (GO:0006886)	0.718069	1	0	0	0.798212	0.26436	SCG5
negative regulation of cell proliferation (GO:0008285)	0.734155	1	0	0	0.763126	0.235832	IL6
protein modification by small protein conjugation (GO:0032446)	0.766255	1	0	0	0.696185	0.185352	KLHDC8B
positive regulation of gene expression (GO:0010628)	0.771915	1	0	0	0.719632	0.186299	IL6;DGKQ
regulation of intracellular signal transduction (GO:1902531)	0.786025	1	0	0	0.656685	0.158108	ARHGAP22
neutrophil mediated immunity (GO:0002446)	0.831663	1	0	0	0.569217	0.104923	IL6
positive regulation of nucleic acid-templated transcription (GO:1903508)	0.840746	1	0	0	0.552242	0.0957948	IL6
regulation of gene expression (GO:0010468)	0.893927	1	0	0	0.535217	0.0600147	IL6;DGKQ
