# Supplementary material for: Molecular mechanisms of fat deposition: &lt;i&gt;IL-6&lt;/i&gt; is a hub gene in fat lipolysis, comparing thin-tailed with fat-tailed sheep breeds
Source: Copernicus journal article supplement (doi:10.5194/aab-64-53-2021), 2021-02-17
Supplement: Supplementary file 5 [file S5.xlsx]

## Sheet: DOWN_reg_DEGs_Biological_Proces
Term	P-value	Adjusted P-value	Old P-value	Old Adjusted P-value	Odds Ratio	Combined Score	Genes
monocarboxylic acid metabolic process (GO:0032787)	1.24977e-06	0.00637758	0	0	7.25242	98.5789	GHR;GRHPR;SCPEP1;VNN1;HLCS;GLO1;ME1;MSMO1;BCO2;DLD
branched-chain amino acid metabolic process (GO:0009081)	6.87607e-06	0.0175443	0	0	17.9662	213.573	GHR;ALDH6A1;PPM1K;ACADSB;DLD
dicarboxylic acid metabolic process (GO:0043648)	0.000109153	0.185668	0	0	7.90514	72.1167	GHR;IDH1;ME1;L2HGDH;GCLM;ALDH1L2
branched-chain amino acid catabolic process (GO:0009083)	0.000126328	0.161163	0	0	15.0574	135.165	ALDH6A1;PPM1K;ACADSB;DLD
acyl-CoA metabolic process (GO:0006637)	0.000142692	0.145631	0	0	9.88142	87.4983	SUCLA2;ACSM3;HMGCS1;OXSM;ACSL6
cellular amino acid catabolic process (GO:0009063)	0.000183227	0.155835	0	0	13.7481	118.299	ALDH6A1;PPM1K;ACADSB;DLD
angiotensin maturation (GO:0002003)	0.000306181	0.223206	0	0	21.5595	174.445	ENPEP;MME;ATP6AP2
iron ion transport (GO:0006826)	0.000404432	0.257977	0	0	19.7628	154.408	TFRC;SLC11A1;SLC40A1
regulation of angiotensin levels in blood (GO:0002002)	0.000404432	0.229313	0	0	19.7628	154.408	ENPEP;MME;ATP6AP2
fatty acid metabolic process (GO:0006631)	0.000424756	0.216753	0	0	5.17159	40.1522	GHR;ACBD5;ABCD2;ACSM3;PNPLA3;MSMO1;CBR4
coenzyme metabolic process (GO:0006732)	0.000498218	0.231128	0	0	7.60109	57.8023	SLC25A16;VNN1;ACSM3;OXSM;ACSL6
2-oxoglutarate metabolic process (GO:0006103)	0.00119293	0.507292	0	0	13.9502	93.9039	GHR;IDH1;L2HGDH
cellular transition metal ion homeostasis (GO:0046916)	0.00124242	0.487697	0	0	5.04583	33.7601	ATP6V1A;SLC30A9;TFRC;SLC11A1;SLC40A1;SLC30A1
positive regulation of lipid catabolic process (GO:0050996)	0.0014182	0.516935	0	0	13.1752	86.408	ABCD2;AADAC;ABHD5
fatty acid catabolic process (GO:0009062)	0.00148447	0.505018	0	0	5.98874	39.0028	ABCD2;ACBD5;EHHADH;HACL1;PEX13
zinc II ion transport (GO:0006829)	0.00224774	0.716888	0	0	11.2931	68.8631	SLC30A6;SLC30A9;SLC30A1
regulation of chemokine-mediated signaling pathway (GO:0070099)	0.00231202	0.694014	0	0	26.3505	159.938	HIF1A;ROBO1
positive regulation of cellular catabolic process (GO:0031331)	0.00240769	0.682582	0	0	4.43279	26.7257	ABCD2;AADAC;VPS35;ABHD5;PIK3CB;HIF1A
positive regulation of triglyceride catabolic process (GO:0010898)	0.00320986	0.862101	0	0	22.5861	129.679	AADAC;ABHD5
valine metabolic process (GO:0006573)	0.00320986	0.818996	0	0	22.5861	129.679	GHR;ALDH6A1
negative regulation of cell adhesion mediated by integrin (GO:0033629)	0.00320986	0.779996	0	0	22.5861	129.679	PDE3B;CYP1B1
fatty acid oxidation (GO:0019395)	0.003921	0.909494	0	0	6.20011	34.3573	ABCD2;EHHADH;HACL1;PEX13
plasma membrane bounded cell projection organization (GO:0120036)	0.00408018	0.905269	0	0	3.98578	21.9282	GSK3B;BLOC1S6;CDNF;GPM6B;RAB11A;UHMK1
proteolysis (GO:0006508)	0.00418398	0.889619	0	0	2.70724	14.8262	SENP6;SCPEP1;USP25;ENPEP;FOLH1;MME;SPPL2A;IDE;CLPX;ZMPSTE24
fatty acid alpha-oxidation (GO:0001561)	0.00424419	0.866324	0	0	19.7628	107.949	HACL1;PEX13
positive regulation of toll-like receptor 4 signaling pathway (GO:0034145)	0.00424419	0.833004	0	0	19.7628	107.949	LBP;LTF
transition metal ion transport (GO:0000041)	0.0051876	0.980457	0	0	8.46979	44.5637	SLC30A9;SLC11A1;SLC30A1
nicotinamide nucleotide biosynthetic process (GO:0019359)	0.00541144	0.986235	0	0	17.567	91.6862	NMNAT1;ME1
axonal transport of mitochondrion (GO:0019896)	0.00541144	0.952227	0	0	17.567	91.6862	OPA1;HIF1A
cellular iron ion homeostasis (GO:0006879)	0.0058435	0.993979	0	0	5.54747	28.5274	ATP6V1A;TFRC;SLC11A1;SLC40A1
regulation of sequestering of zinc ion (GO:0061088)	0.00670812	1	0	0	15.8103	79.1215	SLC30A6;SLC30A1
regulation of triglyceride catabolic process (GO:0010896)	0.00670812	1	0	0	15.8103	79.1215	AADAC;ABHD5
actin filament depolymerization (GO:0030042)	0.00670812	1	0	0	15.8103	79.1215	CFL2;TWF1
cellular zinc ion homeostasis (GO:0006882)	0.00756842	1	0	0	7.41107	36.194	SLC30A9;SLC30A1;S100A9
intrinsic apoptotic signaling pathway in response to oxidative stress (GO:0008631)	0.00813077	1	0	0	14.373	69.1642	CYP1B1;PDK1
retinal metabolic process (GO:0042574)	0.00813077	1	0	0	14.373	69.1642	CYP1B1;BCO2
purine ribonucleoside triphosphate metabolic process (GO:0009205)	0.00824859	1	0	0	7.18649	34.4787	OPA1;AK4;CLPX
cellular amide metabolic process (GO:0043603)	0.00830938	1	0	0	5.01914	24.0435	GHR;VNN1;MME;HLCS
iron ion homeostasis (GO:0055072)	0.00877716	1	0	0	4.94071	23.3972	ATP6V1A;TFRC;SLC11A1;SLC40A1
mitochondrion transport along microtubule (GO:0047497)	0.00967605	1	0	0	13.1752	61.1081	OPA1;HIF1A
regulation of bone remodeling (GO:0046850)	0.00967605	1	0	0	13.1752	61.1081	LEPR;SUCO
purine ribonucleotide metabolic process (GO:0009150)	0.0102827	1	0	0	4.71949	21.6025	OPA1;IMPAD1;AK4;CLPX
neuron development (GO:0048666)	0.0104407	1	0	0	3.27109	14.9229	GSK3B;BLOC1S6;CDNF;GPM6B;RAB11A;UHMK1
cholesterol biosynthetic process (GO:0006695)	0.0104994	1	0	0	6.58762	30.0161	IDI1;HMGCS1;MSMO1
protein complex assembly (GO:0006461)	0.0107324	1	0	0	2.91242	13.2063	GRHPR;GSK3B;SEC23IP;SNX2;OPA1;SAR1B;HACL1
axonal transport (GO:0098930)	0.0113209	1	0	0	6.40957	28.722	BLOC1S6;OPA1;HIF1A
secondary alcohol biosynthetic process (GO:1902653)	0.0113209	1	0	0	6.40957	28.722	IDI1;HMGCS1;MSMO1
regulation of acyl-CoA biosynthetic process (GO:0050812)	0.0113406	1	0	0	12.1618	54.4769	DLD;PDK1
tricarboxylic acid metabolic process (GO:0072350)	0.0113406	1	0	0	12.1618	54.4769	GHR;IDH1
cholesterol metabolic process (GO:0008203)	0.0113737	1	0	0	4.58269	20.5142	IDI1;HMGCS1;SOAT1;MSMO1
response to endoplasmic reticulum stress (GO:0034976)	0.011648	1	0	0	3.69399	16.4479	ERO1A;GSK3B;TMEM33;SEL1L;TMTC3
retrograde transport, endosome to plasma membrane (GO:1990126)	0.0131213	1	0	0	11.2931	48.9387	VPS26A;VPS35
endoplasmic reticulum tubular network organization (GO:0071786)	0.0131213	1	0	0	11.2931	48.9387	TMEM33;LNPK
regulation of acetyl-CoA biosynthetic process from pyruvate (GO:0010510)	0.0131213	1	0	0	11.2931	48.9387	DLD;PDK1
positive regulation of mitochondrial fission (GO:0090141)	0.0131213	1	0	0	11.2931	48.9387	VPS35;DDHD1
amyloid-beta metabolic process (GO:0050435)	0.0131213	1	0	0	11.2931	48.9387	MME;IDE
phosphatidic acid biosynthetic process (GO:0006654)	0.0149696	1	0	0	5.78425	24.3039	PNPLA3;ABHD5;DDHD1
sterol biosynthetic process (GO:0016126)	0.0149696	1	0	0	5.78425	24.3039	IDI1;HMGCS1;MSMO1
positive regulation of multicellular organismal process (GO:0051240)	0.0149921	1	0	0	2.72591	11.4494	GHR;FGF7;TFRC;SLC11A1;LBP;HIF1A;RAB11A
retinoic acid metabolic process (GO:0042573)	0.0150148	1	0	0	10.5402	44.2552	SCPEP1;BCO2
phosphatidic acid metabolic process (GO:0046473)	0.0159735	1	0	0	5.64653	23.3587	PNPLA3;ABHD5;DDHD1
regulation of cellular metabolic process (GO:0031323)	0.0159735	1	0	0	5.64653	23.3587	CYP1B1;VPS35;BCO2
positive regulation of triglyceride metabolic process (GO:0090208)	0.0170182	1	0	0	9.88142	40.2517	AADAC;ABHD5
guanosine-containing compound metabolic process (GO:1901068)	0.0170182	1	0	0	9.88142	40.2517	OPA1;AK4
cytosolic transport (GO:0016482)	0.0177358	1	0	0	3.32149	13.3928	CCDC91;SNX2;ARL1;VPS35;VPS26A
positive regulation of interferon-gamma production (GO:0032729)	0.0180924	1	0	0	5.38987	21.6256	FAM49B;SLC11A1;TLR7
glycerophospholipid biosynthetic process (GO:0046474)	0.0186881	1	0	0	2.8746	11.4405	PNPLA3;PIP4K2A;FAR1;ABHD5;PIK3CB;DDHD1
regulation of tissue remodeling (GO:0034103)	0.0191282	1	0	0	9.30016	36.797	LEPR;SUCO
regulation of toll-like receptor 4 signaling pathway (GO:0034143)	0.0191282	1	0	0	9.30016	36.797	LBP;LTF
macrophage activation (GO:0042116)	0.0191282	1	0	0	9.30016	36.797	SLC11A1;LBP
defense response to fungus (GO:0050832)	0.0191282	1	0	0	9.30016	36.797	S100A9;LTF
pigment granule transport (GO:0051904)	0.0191282	1	0	0	9.30016	36.797	BLOC1S6;RAB11A
negative regulation of cell development (GO:0010721)	0.0191282	1	0	0	9.30016	36.797	GSK3B;LTF
melanosome transport (GO:0032402)	0.0191282	1	0	0	9.30016	36.797	BLOC1S6;RAB11A
neuron projection development (GO:0031175)	0.020224	1	0	0	2.82326	11.0132	GSK3B;BLOC1S6;CDNF;GPM6B;RAB11A;UHMK1
retrograde transport, endosome to Golgi (GO:0042147)	0.0211023	1	0	0	3.80971	14.6993	SNX2;ARL1;VPS35;VPS26A
porphyrin-containing compound biosynthetic process (GO:0006779)	0.0213419	1	0	0	8.78349	33.7908	ALAS1;SUCLA2
membrane lipid metabolic process (GO:0006643)	0.0213419	1	0	0	8.78349	33.7908	POGLUT1;CYP1B1
establishment of melanosome localization (GO:0032401)	0.0213419	1	0	0	8.78349	33.7908	BLOC1S6;RAB11A
anion transmembrane transport (GO:0098656)	0.0213419	1	0	0	8.78349	33.7908	SLC25A16;LRRC8D
negative regulation of oxidative stress-induced intrinsic apoptotic signaling pathway (GO:1902176)	0.0213419	1	0	0	8.78349	33.7908	VNN1;HIF1A
regulation of chemokine production (GO:0032642)	0.0213419	1	0	0	8.78349	33.7908	TLR7;HIF1A
pyruvate metabolic process (GO:0006090)	0.0215497	1	0	0	5.04583	19.3628	GLO1;ME1;DLD
fatty acid biosynthetic process (GO:0006633)	0.0227767	1	0	0	4.94071	18.6858	ACSM3;OXSM;CBR4
fatty-acyl-CoA metabolic process (GO:0035337)	0.0236565	1	0	0	8.3212	31.1556	FAR1;CBR4
positive regulation of toll-like receptor signaling pathway (GO:0034123)	0.0236565	1	0	0	8.3212	31.1556	LBP;LTF
regulation of mitochondrial fission (GO:0090140)	0.0236565	1	0	0	8.3212	31.1556	VPS35;DDHD1
extrinsic apoptotic signaling pathway in absence of ligand (GO:0097192)	0.0236565	1	0	0	8.3212	31.1556	GSK3B;DCC
pattern recognition receptor signaling pathway (GO:0002221)	0.0240411	1	0	0	4.83988	18.043	TLR7;LBP;S100A9
melanosome localization (GO:0032400)	0.0260689	1	0	0	7.90514	28.8301	BLOC1S6;RAB11A
divalent metal ion transport (GO:0070838)	0.0264581	1	0	0	3.55287	12.9047	MRS2;SLC30A9;SLC11A1;SLC30A1
energy reserve metabolic process (GO:0006112)	0.0285764	1	0	0	7.5287	26.7659	GSK3B;LEPR
positive regulation of ossification (GO:0045778)	0.0294707	1	0	0	4.47461	15.7701	SUCO;GPM6B;LTF
regulation of cell-matrix adhesion (GO:0001952)	0.0294707	1	0	0	4.47461	15.7701	GSK3B;PIK3CB;GPM6B
protein O-linked glycosylation via serine (GO:0018242)	0.0311762	1	0	0	7.18649	24.9235	GALNT13;POGLUT1
GTP metabolic process (GO:0046039)	0.0311762	1	0	0	7.18649	24.9235	OPA1;AK4
establishment of protein localization to vacuole (GO:0072666)	0.0311762	1	0	0	7.18649	24.9235	TMEM50B;VPS41
NAD biosynthetic process (GO:0009435)	0.0311762	1	0	0	7.18649	24.9235	NMNAT1;NAMPT
negative regulation of response to endoplasmic reticulum stress (GO:1903573)	0.0311762	1	0	0	7.18649	24.9235	USP25;OPA1
NLS-bearing protein import into nucleus (GO:0006607)	0.0311762	1	0	0	7.18649	24.9235	TNPO1;KPNA1
membrane fusion (GO:0061025)	0.032408	1	0	0	4.31189	14.787	UBXN2B;OPA1;VPS41
inorganic cation transmembrane transport (GO:0098662)	0.0336913	1	0	0	2.80324	9.50443	SLC30A6;NNT;SLC11A1;SLC40A1;SLC30A1
zinc II ion transmembrane transport (GO:0071577)	0.0338656	1	0	0	6.87403	23.2711	SLC30A6;SLC30A1
regulation of ion homeostasis (GO:2000021)	0.0338656	1	0	0	6.87403	23.2711	SLC30A6;SLC30A1
organonitrogen compound catabolic process (GO:1901565)	0.0354923	1	0	0	4.1606	13.8899	ENPEP;IDE;CLPX
ATP metabolic process (GO:0046034)	0.0354923	1	0	0	4.1606	13.8899	NMNAT1;AK4;CLPX
response to molecule of bacterial origin (GO:0002237)	0.0370465	1	0	0	3.194	10.5261	SLC11A1;TNFRSF9;TNFRSF11B;LBP
cellular lipid catabolic process (GO:0044242)	0.0395025	1	0	0	6.32411	20.4357	ACBD5;CYP1B1
positive regulation of vascular endothelial growth factor production (GO:0010575)	0.0395025	1	0	0	6.32411	20.4357	CYP1B1;HIF1A
chaperone mediated protein folding requiring cofactor (GO:0051085)	0.0395025	1	0	0	6.32411	20.4357	ERO1A;HSPA13
cellular modified amino acid biosynthetic process (GO:0042398)	0.0395025	1	0	0	6.32411	20.4357	PLOD2;GCLM
sensory perception of pain (GO:0019233)	0.0395025	1	0	0	6.32411	20.4357	MME;RETREG1
fatty acid derivative biosynthetic process (GO:1901570)	0.0395025	1	0	0	6.32411	20.4357	FAR1;CBR4
sterol metabolic process (GO:0016125)	0.0403918	1	0	0	3.95257	12.6843	SOAT1;CYP1B1;MSMO1
cellular divalent inorganic cation homeostasis (GO:0072503)	0.0406342	1	0	0	3.10005	9.92992	SLC30A9;SLC11A1;SLC30A1;ATP2B1
intrinsic apoptotic signaling pathway (GO:0097193)	0.0406342	1	0	0	3.10005	9.92992	ERO1A;CUL5;CYP1B1;PDK1
long-chain fatty-acyl-CoA metabolic process (GO:0035336)	0.0424448	1	0	0	6.08088	19.2128	ACSL6;FAR1
peptide catabolic process (GO:0043171)	0.0424448	1	0	0	6.08088	19.2128	ENPEP;IDE
protein depolymerization (GO:0051261)	0.0424448	1	0	0	6.08088	19.2128	CFL2;TWF1
negative regulation of cellular protein localization (GO:1903828)	0.0424448	1	0	0	6.08088	19.2128	GSK3B;GPM6B
inflammatory response (GO:0006954)	0.0424953	1	0	0	2.18719	6.90795	VNN1;SLC11A1;TNFRSF9;CYBB;TNFRSF11B;PIK3CB;S100A9
protein targeting to membrane (GO:0006612)	0.043838	1	0	0	3.82507	11.962	TRAM1;PEX3;ZDHHC2
peptide metabolic process (GO:0006518)	0.0444127	1	0	0	3.01148	9.37845	ENPEP;MME;SPPL2A;IDE
cellular protein catabolic process (GO:0044257)	0.0456144	1	0	0	3.76435	11.6226	SCPEP1;IDE;CLPX
regulation of autophagy (GO:0010506)	0.0456257	1	0	0	2.32504	7.17806	ATP6V1A;LEPR;PIP4K2A;VPS35;VPS26A;PIK3CB
protein targeting to vacuole (GO:0006623)	0.0485648	1	0	0	5.64653	17.0799	TMEM50B;VPS41
regulation of vascular endothelial growth factor production (GO:0010574)	0.0485648	1	0	0	5.64653	17.0799	CYP1B1;HIF1A
negative regulation of cell adhesion (GO:0007162)	0.0511542	1	0	0	3.59324	10.6824	PDE3B;CYP1B1;KNG1
acute inflammatory response (GO:0002526)	0.0517375	1	0	0	5.45182	16.146	VNN1;LBP
antigen processing and presentation of peptide antigen via MHC class I (GO:0002474)	0.0517375	1	0	0	5.45182	16.146	SAR1B;CANX
cellular response to insulin stimulus (GO:0032869)	0.0525403	1	0	0	2.8487	8.39276	ATP6V1A;RAB31;PDE3B;IDE
vacuolar transport (GO:0007034)	0.0549823	1	0	0	5.27009	15.2872	TMEM50B;VPS41
positive regulation of developmental process (GO:0051094)	0.0568879	1	0	0	2.77373	7.95139	FGF7;TFRC;VPS35;DDHD1
protein transport (GO:0015031)	0.0569486	1	0	0	1.93398	5.54202	ATP6V1A;SEC23IP;RAB31;TFRC;SNX13;VPS35;VPS26A;RAB11A
cellular protein localization (GO:0034613)	0.0577662	1	0	0	1.92808	5.49764	SEC23IP;FGF7;RAB31;TMEM33;SNX13;VPS35;VPS26A;RAB11A
multivesicular body assembly (GO:0036258)	0.0582968	1	0	0	5.10009	14.4955	STAM2;RAB11A
fatty-acyl-CoA biosynthetic process (GO:0046949)	0.0582968	1	0	0	5.10009	14.4955	ACSL6;CBR4
regulation of cell adhesion mediated by integrin (GO:0033628)	0.0582968	1	0	0	5.10009	14.4955	PDE3B;CYP1B1
'de novo' posttranslational protein folding (GO:0051084)	0.0582968	1	0	0	5.10009	14.4955	ERO1A;HSPA13
protein oligomerization (GO:0051259)	0.0592481	1	0	0	2.17573	6.14865	GRHPR;SNX2;OPA1;HACL1;IDE;POLK
negative regulation of tumor necrosis factor superfamily cytokine production (GO:1903556)	0.0616787	1	0	0	4.94071	13.7639	LBP;LTF
alpha-amino acid metabolic process (GO:1901605)	0.0616787	1	0	0	4.94071	13.7639	GHR;ALDH6A1
regulation of protein export from nucleus (GO:0046825)	0.0616787	1	0	0	4.94071	13.7639	GSK3B;UHMK1
zinc ion homeostasis (GO:0055069)	0.0616787	1	0	0	4.94071	13.7639	SLC30A9;SLC30A1
positive regulation of bone mineralization (GO:0030501)	0.0616787	1	0	0	4.94071	13.7639	GPM6B;LTF
multivesicular body organization (GO:0036257)	0.0616787	1	0	0	4.94071	13.7639	STAM2;RAB11A
vesicle-mediated transport to the plasma membrane (GO:0098876)	0.0616787	1	0	0	4.94071	13.7639	VPS26A;VPS35
positive regulation of cytokine production (GO:0001819)	0.0624514	1	0	0	2.14619	5.95218	FAM49B;SLC11A1;CYP1B1;TLR7;LBP;HIF1A
defense response to Gram-negative bacterium (GO:0050829)	0.0631561	1	0	0	3.29381	9.09798	SLC11A1;LBP;LTF
response to zinc ion (GO:0010043)	0.0651258	1	0	0	4.79099	13.0863	SLC30A6;SLC30A1
phagosome maturation (GO:0090382)	0.0651258	1	0	0	4.79099	13.0863	ATP6V1A;RAB31
response to metal ion (GO:0010038)	0.0652725	1	0	0	3.24869	8.86627	SLC30A6;SLC30A1;HIF1A
lysosomal transport (GO:0007041)	0.0652725	1	0	0	3.24869	8.86627	CCDC91;VPS41;VPS35
regulation of neuron death (GO:1901214)	0.0652725	1	0	0	3.24869	8.86627	GSK3B;DCC;VPS35
positive regulation of inflammatory response (GO:0050729)	0.0674212	1	0	0	3.20479	8.64265	TLR7;LBP;S100A9
regulation of protein complex assembly (GO:0043254)	0.0674212	1	0	0	3.20479	8.64265	SENP6;GSK3B;VPS41
positive regulation of proteasomal protein catabolic process (GO:1901800)	0.0674212	1	0	0	3.20479	8.64265	GSK3B;ANKIB1;TMTC3
intracellular pH reduction (GO:0051452)	0.0686359	1	0	0	4.65008	12.4573	ATP6V1A;SLC11A1
positive regulation of organelle organization (GO:0010638)	0.0686359	1	0	0	4.65008	12.4573	GSK3B;LNPK
positive regulation of epithelial cell migration (GO:0010634)	0.069602	1	0	0	3.16206	8.42676	FGF7;HIF1A;RAB11A
retinoid metabolic process (GO:0001523)	0.0718143	1	0	0	3.12045	8.21824	SCPEP1;CYP1B1;BCO2
regulation of interleukin-8 production (GO:0032677)	0.0722069	1	0	0	4.51722	11.8722	TLR7;LBP
regulation of alcohol biosynthetic process (GO:1902930)	0.0722069	1	0	0	4.51722	11.8722	IDI1;HMGCS1
positive regulation of chemokine production (GO:0032722)	0.0722069	1	0	0	4.51722	11.8722	TLR7;HIF1A
endosomal transport (GO:0016197)	0.0726652	1	0	0	2.06221	5.40689	SNX2;VPS41;ARL1;VPS35;VPS26A;STAM2
cellular response to lipoteichoic acid (GO:0071223)	0.0735484	1	0	0	13.1752	34.3849	LBP
macrophage derived foam cell differentiation (GO:0010742)	0.0735484	1	0	0	13.1752	34.3849	SOAT1
cerebral cortex cell migration (GO:0021795)	0.0735484	1	0	0	13.1752	34.3849	PEX13
regulation of oxidative stress-induced neuron intrinsic apoptotic signaling pathway (GO:1903376)	0.0735484	1	0	0	13.1752	34.3849	HIF1A
succinyl-CoA metabolic process (GO:0006104)	0.0735484	1	0	0	13.1752	34.3849	SUCLA2
regulation of transforming growth factor beta2 production (GO:0032909)	0.0735484	1	0	0	13.1752	34.3849	HIF1A
positive regulation of hormone metabolic process (GO:0032352)	0.0735484	1	0	0	13.1752	34.3849	HIF1A
positive regulation of T cell differentiation in thymus (GO:0033089)	0.0735484	1	0	0	13.1752	34.3849	VNN1
SRP-dependent cotranslational protein targeting to membrane, translocation (GO:0006616)	0.0735484	1	0	0	13.1752	34.3849	SRP54
telencephalon cell migration (GO:0022029)	0.0735484	1	0	0	13.1752	34.3849	PEX13
astral microtubule organization (GO:0030953)	0.0735484	1	0	0	13.1752	34.3849	RAB11A
response to lipoteichoic acid (GO:0070391)	0.0735484	1	0	0	13.1752	34.3849	LBP
ceramide transport (GO:0035627)	0.0735484	1	0	0	13.1752	34.3849	COL4A3BP
muscle tissue development (GO:0060537)	0.0735484	1	0	0	13.1752	34.3849	POGLUT1
lipoprotein catabolic process (GO:0042159)	0.0735484	1	0	0	13.1752	34.3849	LYPLA1
positive regulation of keratinocyte migration (GO:0051549)	0.0735484	1	0	0	13.1752	34.3849	FGF7
iron ion import (GO:0097286)	0.0735484	1	0	0	13.1752	34.3849	TFRC
positive regulation of antigen processing and presentation (GO:0002579)	0.0735484	1	0	0	13.1752	34.3849	SLC11A1
peroxisomal membrane transport (GO:0015919)	0.0735484	1	0	0	13.1752	34.3849	PEX3
oxygen homeostasis (GO:0032364)	0.0735484	1	0	0	13.1752	34.3849	HIF1A
positive regulation of osteoblast proliferation (GO:0033690)	0.0735484	1	0	0	13.1752	34.3849	LTF
citrate metabolic process (GO:0006101)	0.0735484	1	0	0	13.1752	34.3849	GHR
sterol import (GO:0035376)	0.0735484	1	0	0	13.1752	34.3849	STARD4
positive regulation of dendritic cell antigen processing and presentation (GO:0002606)	0.0735484	1	0	0	13.1752	34.3849	SLC11A1
negative regulation of cAMP-mediated signaling (GO:0043951)	0.0735484	1	0	0	13.1752	34.3849	PDE3B
regulation of NFAT protein import into nucleus (GO:0051532)	0.0735484	1	0	0	13.1752	34.3849	GSK3B
L-amino acid import (GO:0043092)	0.0735484	1	0	0	13.1752	34.3849	SLC36A4
cholesterol import (GO:0070508)	0.0735484	1	0	0	13.1752	34.3849	STARD4
regulation of osteoclast development (GO:2001204)	0.0735484	1	0	0	13.1752	34.3849	LTF
foam cell differentiation (GO:0090077)	0.0735484	1	0	0	13.1752	34.3849	SOAT1
response to UV-A (GO:0070141)	0.0735484	1	0	0	13.1752	34.3849	MME
positive regulation of protein localization to centrosome (GO:1904781)	0.0735484	1	0	0	13.1752	34.3849	GSK3B
negative regulation of glycogen biosynthetic process (GO:0045719)	0.0735484	1	0	0	13.1752	34.3849	GSK3B
carboxylic acid transmembrane transport (GO:1905039)	0.0758368	1	0	0	4.39174	11.3271	SLC16A7;SLC36A4
positive regulation of osteoblast differentiation (GO:0045669)	0.0758368	1	0	0	4.39174	11.3271	SUCO;LTF
water-soluble vitamin metabolic process (GO:0006767)	0.0763325	1	0	0	3.04044	7.822	VNN1;HLCS;ALDH1L2
ferric iron transport (GO:0015682)	0.0795234	1	0	0	4.27305	10.8181	ATP6V1A;TFRC
actin polymerization or depolymerization (GO:0008154)	0.0795234	1	0	0	4.27305	10.8181	CFL2;TWF1
acylglycerol metabolic process (GO:0006639)	0.0795234	1	0	0	4.27305	10.8181	SEL1L;PNPLA3
regulation of nitric-oxide synthase activity (GO:0050999)	0.0795234	1	0	0	4.27305	10.8181	LYPLA1;HIF1A
transferrin transport (GO:0033572)	0.0795234	1	0	0	4.27305	10.8181	ATP6V1A;TFRC
epithelial to mesenchymal transition (GO:0001837)	0.0832648	1	0	0	4.1606	10.3421	GSK3B;HIF1A
phospholipid biosynthetic process (GO:0008654)	0.0832648	1	0	0	4.1606	10.3421	IDI1;FAR1
positive regulation of multicellular organism growth (GO:0040018)	0.0852715	1	0	0	11.2931	27.8025	GHR
positive regulation of keratinocyte proliferation (GO:0010838)	0.0852715	1	0	0	11.2931	27.8025	FGF7
cellular lipid biosynthetic process (GO:0097384)	0.0852715	1	0	0	11.2931	27.8025	FAR1
intracellular sterol transport (GO:0032366)	0.0852715	1	0	0	11.2931	27.8025	STARD4
regulation of collateral sprouting (GO:0048670)	0.0852715	1	0	0	11.2931	27.8025	DCC
modulation by symbiont of host cellular process (GO:0044068)	0.0852715	1	0	0	11.2931	27.8025	KPNA1
protein deglutamylation (GO:0035608)	0.0852715	1	0	0	11.2931	27.8025	FOLH1
regulation of hormone biosynthetic process (GO:0046885)	0.0852715	1	0	0	11.2931	27.8025	HIF1A
regulation of dendritic spine maintenance (GO:1902950)	0.0852715	1	0	0	11.2931	27.8025	VPS35
positive regulation of fatty acid beta-oxidation (GO:0032000)	0.0852715	1	0	0	11.2931	27.8025	ABCD2
oxaloacetate metabolic process (GO:0006107)	0.0852715	1	0	0	11.2931	27.8025	GHR
purine ribonucleotide transport (GO:0015868)	0.0852715	1	0	0	11.2931	27.8025	SLC25A16
nucleoside diphosphate metabolic process (GO:0009132)	0.0852715	1	0	0	11.2931	27.8025	AK4
ribosomal protein import into nucleus (GO:0006610)	0.0852715	1	0	0	11.2931	27.8025	TNPO1
cytoplasmic sequestering of NF-kappaB (GO:0007253)	0.0852715	1	0	0	11.2931	27.8025	G3BP2
leukocyte aggregation (GO:0070486)	0.0852715	1	0	0	11.2931	27.8025	S100A9
regulation of NADP metabolic process (GO:1902031)	0.0852715	1	0	0	11.2931	27.8025	ME1
negative regulation of glycogen metabolic process (GO:0070874)	0.0852715	1	0	0	11.2931	27.8025	GSK3B
cellular response to leptin stimulus (GO:0044320)	0.0852715	1	0	0	11.2931	27.8025	LEPR
L-alanine transport (GO:0015808)	0.0852715	1	0	0	11.2931	27.8025	SLC36A4
AMP metabolic process (GO:0046033)	0.0852715	1	0	0	11.2931	27.8025	AK4
gas homeostasis (GO:0033483)	0.0852715	1	0	0	11.2931	27.8025	HIF1A
regulation of isotype switching (GO:0045191)	0.0852715	1	0	0	11.2931	27.8025	TFRC
negative regulation of calcium ion import (GO:0090281)	0.0852715	1	0	0	11.2931	27.8025	SLC30A1
positive regulation of myeloid cell apoptotic process (GO:0033034)	0.0852715	1	0	0	11.2931	27.8025	PIK3CB
response to increased oxygen levels (GO:0036296)	0.0852715	1	0	0	11.2931	27.8025	ATP6V1A
regulation of glycogen (starch) synthase activity (GO:2000465)	0.0852715	1	0	0	11.2931	27.8025	GSK3B
regulation of protein localization to centrosome (GO:1904779)	0.0852715	1	0	0	11.2931	27.8025	GSK3B
glyoxylate metabolic process (GO:0046487)	0.0852715	1	0	0	11.2931	27.8025	GRHPR
negative regulation of dendrite development (GO:2000171)	0.0852715	1	0	0	11.2931	27.8025	DCC
detection of molecule of bacterial origin (GO:0032490)	0.0852715	1	0	0	11.2931	27.8025	LBP
regulation of systemic arterial blood pressure by renin-angiotensin (GO:0003081)	0.0852715	1	0	0	11.2931	27.8025	ENPEP
malate metabolic process (GO:0006108)	0.0852715	1	0	0	11.2931	27.8025	ME1
ER overload response (GO:0006983)	0.0852715	1	0	0	11.2931	27.8025	GSK3B
adenine nucleotide transport (GO:0051503)	0.0852715	1	0	0	11.2931	27.8025	SLC25A16
cAMP catabolic process (GO:0006198)	0.0852715	1	0	0	11.2931	27.8025	PDE3B
protein catabolic process (GO:0030163)	0.0857327	1	0	0	2.89212	7.10456	IDE;STT3B;CLPX
positive regulation of protein catabolic process (GO:0045732)	0.0857327	1	0	0	2.89212	7.10456	GSK3B;VPS35;IDE
chemical homeostasis (GO:0048878)	0.087059	1	0	0	4.05392	9.8963	PNPLA3;ABHD5
protein targeting (GO:0006605)	0.0905571	1	0	0	2.35974	5.66757	TMEM50B;VPS41;SRP54;ZDHHC2
establishment of protein localization to membrane (GO:0090150)	0.0906087	1	0	0	2.82326	6.77924	RAB31;ZDHHC2;RAB11A
negative regulation of neuron death (GO:1901215)	0.0906087	1	0	0	2.82326	6.77924	GSK3B;VPS35;RETREG1
purine ribonucleoside monophosphate metabolic process (GO:0009167)	0.0909041	1	0	0	3.95257	9.47806	AK4;CLPX
protein modification process (GO:0036211)	0.0930893	1	0	0	2.79005	6.62412	ERO1A;USP25;PLOD2
regulation of cholesterol biosynthetic process (GO:0045540)	0.0947982	1	0	0	3.85617	9.08514	IDI1;HMGCS1
regulation of ATPase activity (GO:0043462)	0.0947982	1	0	0	3.85617	9.08514	VMA21;LTF
regulation of vascular associated smooth muscle cell migration (GO:1904752)	0.0968468	1	0	0	9.88142	23.0694	PRKG1
Golgi to lysosome transport (GO:0090160)	0.0968468	1	0	0	9.88142	23.0694	CCDC91
barbed-end actin filament capping (GO:0051016)	0.0968468	1	0	0	9.88142	23.0694	TWF1
aminoglycoside antibiotic metabolic process (GO:0030647)	0.0968468	1	0	0	9.88142	23.0694	CBR4
late endosome to vacuole transport (GO:0045324)	0.0968468	1	0	0	9.88142	23.0694	TMEM50B
defense response to protozoan (GO:0042832)	0.0968468	1	0	0	9.88142	23.0694	SLC11A1
positive regulation of isotype switching (GO:0045830)	0.0968468	1	0	0	9.88142	23.0694	TFRC
sulfur amino acid catabolic process (GO:0000098)	0.0968468	1	0	0	9.88142	23.0694	PCYOX1
nucleoside diphosphate phosphorylation (GO:0006165)	0.0968468	1	0	0	9.88142	23.0694	AK4
leptin-mediated signaling pathway (GO:0033210)	0.0968468	1	0	0	9.88142	23.0694	LEPR
membrane lipid catabolic process (GO:0046466)	0.0968468	1	0	0	9.88142	23.0694	CYP1B1
negative regulation of platelet aggregation (GO:0090331)	0.0968468	1	0	0	9.88142	23.0694	PRKG1
pyrimidine nucleobase metabolic process (GO:0006206)	0.0968468	1	0	0	9.88142	23.0694	ALDH6A1
positive regulation of interleukin-8 biosynthetic process (GO:0045416)	0.0968468	1	0	0	9.88142	23.0694	TLR7
positive regulation of steroid biosynthetic process (GO:0010893)	0.0968468	1	0	0	9.88142	23.0694	STARD4
positive regulation of transforming growth factor beta production (GO:0071636)	0.0968468	1	0	0	9.88142	23.0694	ATP6AP2
daunorubicin metabolic process (GO:0044597)	0.0968468	1	0	0	9.88142	23.0694	CBR4
positive regulation of DNA recombination (GO:0045911)	0.0968468	1	0	0	9.88142	23.0694	TFRC
regulation of PERK-mediated unfolded protein response (GO:1903897)	0.0968468	1	0	0	9.88142	23.0694	TMEM33
positive regulation of respiratory burst (GO:0060267)	0.0968468	1	0	0	9.88142	23.0694	LBP
regulation of ERAD pathway (GO:1904292)	0.0968468	1	0	0	9.88142	23.0694	USP25
nucleotide phosphorylation (GO:0046939)	0.0968468	1	0	0	9.88142	23.0694	AK4
cellular response to UV-B (GO:0071493)	0.0968468	1	0	0	9.88142	23.0694	MME
regulation of dendritic cell antigen processing and presentation (GO:0002604)	0.0968468	1	0	0	9.88142	23.0694	SLC11A1
glycerolipid biosynthetic process (GO:0045017)	0.0968468	1	0	0	9.88142	23.0694	FAR1
protein desumoylation (GO:0016926)	0.0968468	1	0	0	9.88142	23.0694	SENP6
acylglycerol acyl-chain remodeling (GO:0036155)	0.0968468	1	0	0	9.88142	23.0694	PNPLA3
plasma membrane to endosome transport (GO:0048227)	0.0968468	1	0	0	9.88142	23.0694	RAB11A
regulation of transcription from RNA polymerase II promoter in response to oxidative stress (GO:0043619)	0.0968468	1	0	0	9.88142	23.0694	HIF1A
insulin metabolic process (GO:1901142)	0.0968468	1	0	0	9.88142	23.0694	IDE
peptidyl-lysine hydroxylation (GO:0017185)	0.0968468	1	0	0	9.88142	23.0694	PLOD2
regulation of dopamine receptor signaling pathway (GO:0060159)	0.0968468	1	0	0	9.88142	23.0694	VPS35
phosphatidylinositol-3-phosphate biosynthetic process (GO:0036092)	0.0968468	1	0	0	9.88142	23.0694	PIK3CB
positive regulation of IRE1-mediated unfolded protein response (GO:1903896)	0.0968468	1	0	0	9.88142	23.0694	TMEM33
isoprenoid biosynthetic process (GO:0008299)	0.0968468	1	0	0	9.88142	23.0694	IDI1
response to leptin (GO:0044321)	0.0968468	1	0	0	9.88142	23.0694	LEPR
pantothenate metabolic process (GO:0015939)	0.0968468	1	0	0	9.88142	23.0694	VNN1
regulation of keratinocyte migration (GO:0051547)	0.0968468	1	0	0	9.88142	23.0694	FGF7
succinate metabolic process (GO:0006105)	0.0968468	1	0	0	9.88142	23.0694	GHR
regulation of type B pancreatic cell development (GO:2000074)	0.0968468	1	0	0	9.88142	23.0694	GSK3B
late endosome to vacuole transport via multivesicular body sorting pathway (GO:0032511)	0.0968468	1	0	0	9.88142	23.0694	TMEM50B
negative regulation of double-strand break repair via homologous recombination (GO:2000042)	0.0968468	1	0	0	9.88142	23.0694	POLK
toll-like receptor signaling pathway (GO:0002224)	0.0981337	1	0	0	2.72591	6.32799	TLR7;LBP;S100A9
mesenchymal cell differentiation (GO:0048762)	0.0987394	1	0	0	3.76435	8.71549	GSK3B;HIF1A
regulation of cholesterol metabolic process (GO:0090181)	0.0987394	1	0	0	3.76435	8.71549	IDI1;HMGCS1
response to lipid (GO:0033993)	0.10417	1	0	0	2.24259	5.07215	SLC11A1;TNFRSF9;TNFRSF11B;LBP
response to unfolded protein (GO:0006986)	0.106756	1	0	0	3.59324	8.03883	STT3B;HSPA13
regulation of interferon-gamma production (GO:0032649)	0.106756	1	0	0	3.59324	8.03883	FAM49B;SLC11A1
nucleoside triphosphate biosynthetic process (GO:0009142)	0.108276	1	0	0	8.78349	19.5263	AK4
alanine transport (GO:0032328)	0.108276	1	0	0	8.78349	19.5263	SLC36A4
membrane disruption in other organism (GO:0051673)	0.108276	1	0	0	8.78349	19.5263	LTF
manganese ion transport (GO:0006828)	0.108276	1	0	0	8.78349	19.5263	SLC11A1
omega-hydroxylase P450 pathway (GO:0097267)	0.108276	1	0	0	8.78349	19.5263	CYP1B1
doxorubicin metabolic process (GO:0044598)	0.108276	1	0	0	8.78349	19.5263	CBR4
regulation of bile acid biosynthetic process (GO:0070857)	0.108276	1	0	0	8.78349	19.5263	STARD4
regulation of amyloid precursor protein biosynthetic process (GO:0042984)	0.108276	1	0	0	8.78349	19.5263	SOAT1
short-chain fatty acid metabolic process (GO:0046459)	0.108276	1	0	0	8.78349	19.5263	OXSM
regulation of T-helper 1 type immune response (GO:0002825)	0.108276	1	0	0	8.78349	19.5263	SLC11A1
regulation of SNARE complex assembly (GO:0035542)	0.108276	1	0	0	8.78349	19.5263	VPS41
glucose import (GO:0046323)	0.108276	1	0	0	8.78349	19.5263	SLC2A10
positive regulation of nitric-oxide synthase biosynthetic process (GO:0051770)	0.108276	1	0	0	8.78349	19.5263	NAMPT
protein modification by small protein conjugation or removal (GO:0070647)	0.108276	1	0	0	8.78349	19.5263	SENP6
positive regulation of cholesterol esterification (GO:0010873)	0.108276	1	0	0	8.78349	19.5263	STARD4
ether lipid metabolic process (GO:0046485)	0.108276	1	0	0	8.78349	19.5263	FAR1
positive regulation of leukocyte apoptotic process (GO:2000108)	0.108276	1	0	0	8.78349	19.5263	PIK3CB
endosome to melanosome transport (GO:0035646)	0.108276	1	0	0	8.78349	19.5263	BLOC1S6
dynamin family protein polymerization involved in mitochondrial fission (GO:0003374)	0.108276	1	0	0	8.78349	19.5263	OPA1
T cell mediated immunity (GO:0002456)	0.108276	1	0	0	8.78349	19.5263	SLC11A1
proline transport (GO:0015824)	0.108276	1	0	0	8.78349	19.5263	SLC36A4
endosome to pigment granule transport (GO:0043485)	0.108276	1	0	0	8.78349	19.5263	BLOC1S6
nucleoside phosphate biosynthetic process (GO:1901293)	0.108276	1	0	0	8.78349	19.5263	AK4
mitochondrial fragmentation involved in apoptotic process (GO:0043653)	0.108276	1	0	0	8.78349	19.5263	VPS35
proton-transporting V-type ATPase complex assembly (GO:0070070)	0.108276	1	0	0	8.78349	19.5263	VMA21
cellular response to oxygen levels (GO:0071453)	0.108276	1	0	0	8.78349	19.5263	ATP6V1A
early endosome to Golgi transport (GO:0034498)	0.108276	1	0	0	8.78349	19.5263	SNX2
positive regulation of autophagosome assembly (GO:2000786)	0.108276	1	0	0	8.78349	19.5263	PIP4K2A
positive regulation of immunoglobulin mediated immune response (GO:0002891)	0.108276	1	0	0	8.78349	19.5263	TFRC
response to vitamin (GO:0033273)	0.108276	1	0	0	8.78349	19.5263	HLCS
cyclic nucleotide catabolic process (GO:0009214)	0.108276	1	0	0	8.78349	19.5263	PDE3B
cholesterol transport (GO:0030301)	0.110828	1	0	0	3.51339	7.72867	STARD4;SOAT1
regulation of steroid biosynthetic process (GO:0050810)	0.110828	1	0	0	3.51339	7.72867	IDI1;HMGCS1
positive regulation of interleukin-8 production (GO:0032757)	0.110828	1	0	0	3.51339	7.72867	TLR7;LBP
nicotinamide nucleotide metabolic process (GO:0046496)	0.11494	1	0	0	3.43702	7.43544	NMNAT1;DLD
proteolysis involved in cellular protein catabolic process (GO:0051603)	0.116621	1	0	0	2.52292	5.42131	SCPEP1;IDE;CLPX
icosanoid metabolic process (GO:0006690)	0.119091	1	0	0	3.36389	7.15791	CYP1B1;CYP4F8
actin filament capping (GO:0051693)	0.119562	1	0	0	7.90514	16.7899	TWF1
dynamin family protein polymerization involved in membrane fission (GO:0003373)	0.119562	1	0	0	7.90514	16.7899	OPA1
vacuolar proton-transporting V-type ATPase complex assembly (GO:0070072)	0.119562	1	0	0	7.90514	16.7899	VMA21
cellular response to growth hormone stimulus (GO:0071378)	0.119562	1	0	0	7.90514	16.7899	GHR
positive regulation of steroid metabolic process (GO:0045940)	0.119562	1	0	0	7.90514	16.7899	STARD4
superoxide anion generation (GO:0042554)	0.119562	1	0	0	7.90514	16.7899	CYBB
negative regulation of oxidative stress-induced neuron death (GO:1903204)	0.119562	1	0	0	7.90514	16.7899	HIF1A
regulation of mammary gland epithelial cell proliferation (GO:0033599)	0.119562	1	0	0	7.90514	16.7899	ROBO1
negative regulation by host of viral process (GO:0044793)	0.119562	1	0	0	7.90514	16.7899	LTF
regulation of transforming growth factor beta production (GO:0071634)	0.119562	1	0	0	7.90514	16.7899	HIF1A
creatine metabolic process (GO:0006600)	0.119562	1	0	0	7.90514	16.7899	GHR
nuclear pore complex assembly (GO:0051292)	0.119562	1	0	0	7.90514	16.7899	TMEM33
very-low-density lipoprotein particle assembly (GO:0034379)	0.119562	1	0	0	7.90514	16.7899	SOAT1
glycoprotein catabolic process (GO:0006516)	0.119562	1	0	0	7.90514	16.7899	STT3B
glycerolipid metabolic process (GO:0046486)	0.119562	1	0	0	7.90514	16.7899	PNPLA3
negative regulation of homotypic cell-cell adhesion (GO:0034111)	0.119562	1	0	0	7.90514	16.7899	PRKG1
positive regulation of adaptive immune response based on somatic recombination of immune receptors built from immunoglobulin superfamily domains (GO:0002824)	0.119562	1	0	0	7.90514	16.7899	SLC11A1
medium-chain fatty acid metabolic process (GO:0051791)	0.119562	1	0	0	7.90514	16.7899	OXSM
positive regulation of vacuole organization (GO:0044090)	0.119562	1	0	0	7.90514	16.7899	PIP4K2A
sequestering of actin monomers (GO:0042989)	0.119562	1	0	0	7.90514	16.7899	TWF1
quinone metabolic process (GO:1901661)	0.119562	1	0	0	7.90514	16.7899	CBR4
endosomal vesicle fusion (GO:0034058)	0.119562	1	0	0	7.90514	16.7899	VPS41
negative regulation of lipopolysaccharide-mediated signaling pathway (GO:0031665)	0.119562	1	0	0	7.90514	16.7899	LTF
intracellular cholesterol transport (GO:0032367)	0.119562	1	0	0	7.90514	16.7899	STARD4
regulation of fatty acid beta-oxidation (GO:0031998)	0.119562	1	0	0	7.90514	16.7899	ABCD2
insulin-like growth factor receptor signaling pathway (GO:0048009)	0.119562	1	0	0	7.90514	16.7899	GHR
positive regulation of circadian rhythm (GO:0042753)	0.119562	1	0	0	7.90514	16.7899	ARNTL2
regulated exocytosis (GO:0045055)	0.120794	1	0	0	2.12218	4.48559	FAM49B;RAB31;SCCPDH;KNG1
regulation of cytoskeleton organization (GO:0051493)	0.122127	1	0	0	2.47036	5.1944	GSK3B;S100A9;GPM6B
regulation of epithelial cell migration (GO:0010632)	0.127502	1	0	0	3.22659	6.64556	HIF1A;RAB11A
glycoprotein metabolic process (GO:0009100)	0.127502	1	0	0	3.22659	6.64556	STT3B;HIF1A
regulation of mitochondrion organization (GO:0010821)	0.127502	1	0	0	3.22659	6.64556	GSK3B;VPS35
positive regulation of neuron projection development (GO:0010976)	0.127727	1	0	0	2.41994	4.97991	TWF1;S100A9;ROBO1
regulation of cholesterol esterification (GO:0010872)	0.130705	1	0	0	7.18649	14.6232	STARD4
interleukin-27-mediated signaling pathway (GO:0070106)	0.130705	1	0	0	7.18649	14.6232	CANX
replicative senescence (GO:0090399)	0.130705	1	0	0	7.18649	14.6232	MME
nitric oxide biosynthetic process (GO:0006809)	0.130705	1	0	0	7.18649	14.6232	CYP1B1
regulation of feeding behavior (GO:0060259)	0.130705	1	0	0	7.18649	14.6232	LEPR
negative regulation of protein localization to nucleus (GO:1900181)	0.130705	1	0	0	7.18649	14.6232	GSK3B
intracellular protein transmembrane transport (GO:0065002)	0.130705	1	0	0	7.18649	14.6232	SRP54
regulation of vascular endothelial growth factor signaling pathway (GO:1900746)	0.130705	1	0	0	7.18649	14.6232	ROBO1
negative regulation of chemotaxis (GO:0050922)	0.130705	1	0	0	7.18649	14.6232	ROBO1
positive regulation of receptor biosynthetic process (GO:0010870)	0.130705	1	0	0	7.18649	14.6232	HIF1A
I-kappaB phosphorylation (GO:0007252)	0.130705	1	0	0	7.18649	14.6232	TLR7
positive regulation of cytolysis (GO:0045919)	0.130705	1	0	0	7.18649	14.6232	LBP
cellular response to increased oxygen levels (GO:0036295)	0.130705	1	0	0	7.18649	14.6232	ATP6V1A
modulation by host of viral process (GO:0044788)	0.130705	1	0	0	7.18649	14.6232	LTF
positive regulation of fatty acid oxidation (GO:0046321)	0.130705	1	0	0	7.18649	14.6232	ABCD2
regulation of actin filament depolymerization (GO:0030834)	0.130705	1	0	0	7.18649	14.6232	CFL2
biotin metabolic process (GO:0006768)	0.130705	1	0	0	7.18649	14.6232	HLCS
magnesium ion transport (GO:0015693)	0.130705	1	0	0	7.18649	14.6232	MRS2
myeloid cell activation involved in immune response (GO:0002275)	0.130705	1	0	0	7.18649	14.6232	LBP
internal protein amino acid acetylation (GO:0006475)	0.130705	1	0	0	7.18649	14.6232	EHHADH
aspartate family amino acid biosynthetic process (GO:0009067)	0.130705	1	0	0	7.18649	14.6232	PLOD2
carbohydrate derivative catabolic process (GO:1901136)	0.130705	1	0	0	7.18649	14.6232	STT3B
glutathione biosynthetic process (GO:0006750)	0.130705	1	0	0	7.18649	14.6232	GCLM
T cell proliferation (GO:0042098)	0.130705	1	0	0	7.18649	14.6232	SLC11A1
positive regulation of actin filament depolymerization (GO:0030836)	0.130705	1	0	0	7.18649	14.6232	CFL2
regulation of receptor biosynthetic process (GO:0010869)	0.130705	1	0	0	7.18649	14.6232	HIF1A
positive regulation of glycoprotein biosynthetic process (GO:0010560)	0.130705	1	0	0	7.18649	14.6232	SOAT1
interleukin-35-mediated signaling pathway (GO:0070757)	0.130705	1	0	0	7.18649	14.6232	CANX
transcytosis (GO:0045056)	0.130705	1	0	0	7.18649	14.6232	VPS35
negative regulation of protein localization to cell surface (GO:2000009)	0.130705	1	0	0	7.18649	14.6232	GPM6B
positive regulation of interferon-gamma biosynthetic process (GO:0045078)	0.130705	1	0	0	7.18649	14.6232	TLR7
organic hydroxy compound biosynthetic process (GO:1901617)	0.131758	1	0	0	3.16206	6.40881	PSAT1;MSMO1
antimicrobial humoral immune response mediated by antimicrobial peptide (GO:0061844)	0.131758	1	0	0	3.16206	6.40881	S100A9;LTF
regulation of reactive oxygen species metabolic process (GO:2000377)	0.131758	1	0	0	3.16206	6.40881	CYP1B1;BCO2
lipid homeostasis (GO:0055088)	0.131758	1	0	0	3.16206	6.40881	PNPLA3;ABHD5
receptor internalization (GO:0031623)	0.136047	1	0	0	3.10005	6.18385	RAB31;TFRC
fatty acid beta-oxidation (GO:0006635)	0.136047	1	0	0	3.10005	6.18385	ABCD2;EHHADH
response to lipopolysaccharide (GO:0032496)	0.136213	1	0	0	2.02696	4.04082	SLC11A1;TNFRSF9;TNFRSF11B;LBP
regulation of lipid metabolic process (GO:0019216)	0.136294	1	0	0	2.34806	4.67955	ALAS1;HMGCS1;ME1
positive regulation of macromolecule metabolic process (GO:0010604)	0.140259	1	0	0	1.7123	3.36342	GSK3B;FUBP3;SLC11A1;VPS35;PIK3CB;HIF1A
response to organonitrogen compound (GO:0010243)	0.140367	1	0	0	3.04044	5.96989	HLCS;SEL1L
positive regulation of protein depolymerization (GO:1901881)	0.141707	1	0	0	6.58762	12.8721	CFL2
lysine metabolic process (GO:0006553)	0.141707	1	0	0	6.58762	12.8721	DLD
negative regulation of ATPase activity (GO:0032780)	0.141707	1	0	0	6.58762	12.8721	LTF
regulation of IRE1-mediated unfolded protein response (GO:1903894)	0.141707	1	0	0	6.58762	12.8721	TMEM33
retinol metabolic process (GO:0042572)	0.141707	1	0	0	6.58762	12.8721	CYP1B1
negative regulation of ERAD pathway (GO:1904293)	0.141707	1	0	0	6.58762	12.8721	USP25
negative regulation of vascular smooth muscle cell proliferation (GO:1904706)	0.141707	1	0	0	6.58762	12.8721	PRKG1
regulation of sequestering of triglyceride (GO:0010889)	0.141707	1	0	0	6.58762	12.8721	ABHD5
collagen metabolic process (GO:0032963)	0.141707	1	0	0	6.58762	12.8721	HIF1A
carbohydrate derivative transport (GO:1901264)	0.141707	1	0	0	6.58762	12.8721	LBP
negative regulation of epithelial cell differentiation (GO:0030857)	0.141707	1	0	0	6.58762	12.8721	GSK3B
cellular modified amino acid catabolic process (GO:0042219)	0.141707	1	0	0	6.58762	12.8721	PCYOX1
positive regulation of endoplasmic reticulum unfolded protein response (GO:1900103)	0.141707	1	0	0	6.58762	12.8721	TMEM33
positive regulation of T-helper 1 type immune response (GO:0002827)	0.141707	1	0	0	6.58762	12.8721	SLC11A1
aromatic compound biosynthetic process (GO:0019438)	0.141707	1	0	0	6.58762	12.8721	PSAT1
lysine catabolic process (GO:0006554)	0.141707	1	0	0	6.58762	12.8721	DLD
protein hydroxylation (GO:0018126)	0.141707	1	0	0	6.58762	12.8721	PLOD2
regulation of blood vessel size (GO:0050880)	0.141707	1	0	0	6.58762	12.8721	GCLM
L-serine metabolic process (GO:0006563)	0.141707	1	0	0	6.58762	12.8721	PSAT1
nonribosomal peptide biosynthetic process (GO:0019184)	0.141707	1	0	0	6.58762	12.8721	GCLM
transcription from mitochondrial promoter (GO:0006390)	0.141707	1	0	0	6.58762	12.8721	TFAM
protein import into peroxisome matrix (GO:0016558)	0.141707	1	0	0	6.58762	12.8721	PEX13
prostanoid metabolic process (GO:0006692)	0.141707	1	0	0	6.58762	12.8721	CYP4F8
regulation of T cell differentiation in thymus (GO:0033081)	0.141707	1	0	0	6.58762	12.8721	VNN1
endosome transport via multivesicular body sorting pathway (GO:0032509)	0.141707	1	0	0	6.58762	12.8721	TMEM50B
cellular glucan metabolic process (GO:0006073)	0.141707	1	0	0	6.58762	12.8721	GSK3B
somatic hypermutation of immunoglobulin genes (GO:0016446)	0.141707	1	0	0	6.58762	12.8721	POLK
regulation of interleukin-8 biosynthetic process (GO:0045414)	0.141707	1	0	0	6.58762	12.8721	TLR7
nitric oxide metabolic process (GO:0046209)	0.141707	1	0	0	6.58762	12.8721	CYP1B1
positive regulation of vascular endothelial growth factor receptor signaling pathway (GO:0030949)	0.141707	1	0	0	6.58762	12.8721	HIF1A
triglyceride metabolic process (GO:0006641)	0.144715	1	0	0	2.98307	5.76623	SEL1L;PNPLA3
vesicle-mediated transport (GO:0016192)	0.15156	1	0	0	1.53871	2.90321	SNX2;VPS41;ARL1;VPS35;VPS26A;SFT2D2;HSPA13;RAB11A
modulation by virus of host process (GO:0019054)	0.152571	1	0	0	6.08088	11.4328	KPNA1
response to iron ion (GO:0010039)	0.152571	1	0	0	6.08088	11.4328	HIF1A
regulation of nitric-oxide synthase biosynthetic process (GO:0051769)	0.152571	1	0	0	6.08088	11.4328	NAMPT
negative regulation of hemostasis (GO:1900047)	0.152571	1	0	0	6.08088	11.4328	KNG1
regulation of plasma membrane bounded cell projection organization (GO:0120035)	0.152571	1	0	0	6.08088	11.4328	VPS35
mitochondrial genome maintenance (GO:0000002)	0.152571	1	0	0	6.08088	11.4328	OPA1
embryonic appendage morphogenesis (GO:0035113)	0.152571	1	0	0	6.08088	11.4328	MBNL1
secretion (GO:0046903)	0.152571	1	0	0	6.08088	11.4328	TPD52
negative regulation of blood pressure (GO:0045776)	0.152571	1	0	0	6.08088	11.4328	SCPEP1
regulation of cytolysis (GO:0042268)	0.152571	1	0	0	6.08088	11.4328	LBP
serine family amino acid biosynthetic process (GO:0009070)	0.152571	1	0	0	6.08088	11.4328	PSAT1
response to UV-B (GO:0010224)	0.152571	1	0	0	6.08088	11.4328	MME
toll-like receptor 9 signaling pathway (GO:0034162)	0.152571	1	0	0	6.08088	11.4328	TLR7
regulation of cellular carbohydrate metabolic process (GO:0010675)	0.152571	1	0	0	6.08088	11.4328	PDK1
sensory perception (GO:0007600)	0.153495	1	0	0	2.8746	5.38724	MME;RETREG1
intracellular protein transport (GO:0006886)	0.153603	1	0	0	1.59011	2.97889	SEC23IP;RAB31;SNX13;VPS35;VPS26A;TNPO1;RAB11A
positive regulation of I-kappaB kinase/NF-kappaB signaling (GO:0043123)	0.15475	1	0	0	1.92808	3.5977	GOLT1B;TLR7;S100B;LTF
neutrophil degranulation (GO:0043312)	0.156477	1	0	0	1.48221	2.74928	VNN1;RAB31;MME;SLC11A1;IDH1;ATP6AP2;CYBB;S100A9;LTF
long-chain fatty acid metabolic process (GO:0001676)	0.157924	1	0	0	2.82326	5.21074	PNPLA3;CYP1B1
neutrophil activation involved in immune response (GO:0002283)	0.161886	1	0	0	1.46996	2.6766	VNN1;RAB31;MME;SLC11A1;IDH1;ATP6AP2;CYBB;S100A9;LTF
Wnt signaling pathway (GO:0016055)	0.163097	1	0	0	2.15595	3.90962	GSK3B;VPS35;VPS26A
monosaccharide transport (GO:0015749)	0.163298	1	0	0	5.64653	10.2325	SLC2A10
Golgi to vacuole transport (GO:0006896)	0.163298	1	0	0	5.64653	10.2325	CCDC91
negative regulation of endoplasmic reticulum stress-induced intrinsic apoptotic signaling pathway (GO:1902236)	0.163298	1	0	0	5.64653	10.2325	OPA1
acetyl-CoA metabolic process (GO:0006084)	0.163298	1	0	0	5.64653	10.2325	HMGCS1
lipid particle organization (GO:0034389)	0.163298	1	0	0	5.64653	10.2325	PNPLA3
regulation of nucleocytoplasmic transport (GO:0046822)	0.163298	1	0	0	5.64653	10.2325	UHMK1
regulation of gastrulation (GO:0010470)	0.163298	1	0	0	5.64653	10.2325	POGLUT1
pore complex assembly (GO:0046931)	0.163298	1	0	0	5.64653	10.2325	TMEM33
glycoside metabolic process (GO:0016137)	0.163298	1	0	0	5.64653	10.2325	CBR4
regulation of platelet aggregation (GO:0090330)	0.163298	1	0	0	5.64653	10.2325	PRKG1
regulation of synapse organization (GO:0050807)	0.163298	1	0	0	5.64653	10.2325	VPS35
positive regulation of T cell mediated cytotoxicity (GO:0001916)	0.163298	1	0	0	5.64653	10.2325	FAM49B
acyl-CoA biosynthetic process (GO:0071616)	0.163298	1	0	0	5.64653	10.2325	CBR4
negative regulation of smooth muscle cell migration (GO:0014912)	0.163298	1	0	0	5.64653	10.2325	PRKG1
nucleoside triphosphate metabolic process (GO:0009141)	0.163298	1	0	0	5.64653	10.2325	AK4
regulation of interferon-gamma biosynthetic process (GO:0045072)	0.163298	1	0	0	5.64653	10.2325	TLR7
estrogen metabolic process (GO:0008210)	0.163298	1	0	0	5.64653	10.2325	CYP1B1
cell migration involved in sprouting angiogenesis (GO:0002042)	0.163298	1	0	0	5.64653	10.2325	ROBO1
positive regulation of blood vessel diameter (GO:0097755)	0.163298	1	0	0	5.64653	10.2325	SCPEP1
neutrophil mediated immunity (GO:0002446)	0.167385	1	0	0	1.45791	2.60596	VNN1;RAB31;MME;SLC11A1;IDH1;ATP6AP2;CYBB;S100A9;LTF
sterol homeostasis (GO:0055092)	0.171346	1	0	0	2.67971	4.72719	ACSM3;SOAT1
receptor metabolic process (GO:0043112)	0.171346	1	0	0	2.67971	4.72719	RAB31;TFRC
ubiquitin-dependent ERAD pathway (GO:0030433)	0.171346	1	0	0	2.67971	4.72719	SEL1L;STT3B
cholesterol homeostasis (GO:0042632)	0.171346	1	0	0	2.67971	4.72719	ACSM3;SOAT1
peptidyl-serine modification (GO:0018209)	0.171699	1	0	0	1.84916	3.25823	GSK3B;GALNT13;POGLUT1;UHMK1
NAD biosynthesis via nicotinamide riboside salvage pathway (GO:0034356)	0.17389	1	0	0	5.27009	9.21915	NAMPT
fatty acid beta-oxidation using acyl-CoA oxidase (GO:0033540)	0.17389	1	0	0	5.27009	9.21915	EHHADH
apoptotic DNA fragmentation (GO:0006309)	0.17389	1	0	0	5.27009	9.21915	KPNA1
nuclear pore organization (GO:0006999)	0.17389	1	0	0	5.27009	9.21915	TMEM33
selective autophagy (GO:0061912)	0.17389	1	0	0	5.27009	9.21915	RETREG1
positive regulation of glycolytic process (GO:0045821)	0.17389	1	0	0	5.27009	9.21915	HIF1A
negative regulation of platelet activation (GO:0010544)	0.17389	1	0	0	5.27009	9.21915	PRKG1
positive regulation of collagen metabolic process (GO:0010714)	0.17389	1	0	0	5.27009	9.21915	SUCO
positive regulation of NF-kappaB import into nucleus (GO:0042346)	0.17389	1	0	0	5.27009	9.21915	TLR7
positive regulation of coenzyme metabolic process (GO:0051197)	0.17389	1	0	0	5.27009	9.21915	HIF1A
L-alpha-amino acid transmembrane transport (GO:1902475)	0.17389	1	0	0	5.27009	9.21915	SLC36A4
anterograde synaptic vesicle transport (GO:0048490)	0.17389	1	0	0	5.27009	9.21915	BLOC1S6
intracellular lipid transport (GO:0032365)	0.17389	1	0	0	5.27009	9.21915	COL4A3BP
JAK-STAT cascade involved in growth hormone signaling pathway (GO:0060397)	0.17389	1	0	0	5.27009	9.21915	GHR
negative regulation of coagulation (GO:0050819)	0.17389	1	0	0	5.27009	9.21915	KNG1
positive regulation of collagen biosynthetic process (GO:0032967)	0.17389	1	0	0	5.27009	9.21915	SUCO
toll-like receptor 4 signaling pathway (GO:0034142)	0.17389	1	0	0	5.27009	9.21915	LBP
regulation of T cell mediated cytotoxicity (GO:0001914)	0.17389	1	0	0	5.27009	9.21915	FAM49B
protein targeting to peroxisome (GO:0006625)	0.17389	1	0	0	5.27009	9.21915	PEX3
synaptic vesicle transport along microtubule (GO:0099517)	0.17389	1	0	0	5.27009	9.21915	BLOC1S6
positive regulation of protein export from nucleus (GO:0046827)	0.17389	1	0	0	5.27009	9.21915	GSK3B
regulation of clathrin-dependent endocytosis (GO:2000369)	0.17389	1	0	0	5.27009	9.21915	PIK3CB
regulation of cell-substrate junction assembly (GO:0090109)	0.17389	1	0	0	5.27009	9.21915	GPM6B
negative regulation of lipid catabolic process (GO:0050995)	0.17389	1	0	0	5.27009	9.21915	PDE3B
negative regulation of release of cytochrome c from mitochondria (GO:0090201)	0.17389	1	0	0	5.27009	9.21915	OPA1
establishment of protein localization to endoplasmic reticulum (GO:0072599)	0.17389	1	0	0	5.27009	9.21915	SRP54
regulation of organelle organization (GO:0033043)	0.175481	1	0	0	2.0803	3.62018	TMEM33;VPS35;S100A9
positive regulation of protein binding (GO:0032092)	0.180396	1	0	0	2.59185	4.4388	GSK3B;STK3
membrane lipid biosynthetic process (GO:0046467)	0.180396	1	0	0	2.59185	4.4388	COL4A3BP;SCCPDH
cellular response to oxidative stress (GO:0034599)	0.18177	1	0	0	2.04443	3.48578	ERO1A;CYBB;HIF1A
negative regulation of NF-kappaB import into nucleus (GO:0042347)	0.184348	1	0	0	4.94071	8.3544	G3BP2
lipopolysaccharide-mediated signaling pathway (GO:0031663)	0.184348	1	0	0	4.94071	8.3544	LBP
regulation of osteoblast proliferation (GO:0033688)	0.184348	1	0	0	4.94071	8.3544	LTF
regulation of systemic arterial blood pressure by hormone (GO:0001990)	0.184348	1	0	0	4.94071	8.3544	ENPEP
bone morphogenesis (GO:0060349)	0.184348	1	0	0	4.94071	8.3544	LTF
glucose transmembrane transport (GO:1904659)	0.184348	1	0	0	4.94071	8.3544	SLC2A10
positive regulation of nitric-oxide synthase activity (GO:0051000)	0.184348	1	0	0	4.94071	8.3544	HIF1A
positive regulation of G2/M transition of mitotic cell cycle (GO:0010971)	0.184348	1	0	0	4.94071	8.3544	RAB11A
mRNA transcription from RNA polymerase II promoter (GO:0042789)	0.184348	1	0	0	4.94071	8.3544	HIF1A
cytoplasmic sequestering of transcription factor (GO:0042994)	0.184348	1	0	0	4.94071	8.3544	G3BP2
protein deacylation (GO:0035601)	0.184348	1	0	0	4.94071	8.3544	LYPLA1
extracellular matrix assembly (GO:0085029)	0.184348	1	0	0	4.94071	8.3544	GPM6B
regulation of energy homeostasis (GO:2000505)	0.184348	1	0	0	4.94071	8.3544	LEPR
heme biosynthetic process (GO:0006783)	0.184348	1	0	0	4.94071	8.3544	ALAS1
mitochondrial fusion (GO:0008053)	0.184348	1	0	0	4.94071	8.3544	OPA1
positive regulation of immune system process (GO:0002684)	0.184348	1	0	0	4.94071	8.3544	PIK3CB
endoplasmic reticulum to cytosol transport (GO:1903513)	0.184348	1	0	0	4.94071	8.3544	SEL1L
myoblast differentiation (GO:0045445)	0.184348	1	0	0	4.94071	8.3544	MBNL1
hexose transport (GO:0008645)	0.184348	1	0	0	4.94071	8.3544	SLC2A10
inner dynein arm assembly (GO:0036159)	0.184348	1	0	0	4.94071	8.3544	DNHD1
negative regulation of lipid storage (GO:0010888)	0.184348	1	0	0	4.94071	8.3544	ABHD5
negative regulation of DNA recombination (GO:0045910)	0.184348	1	0	0	4.94071	8.3544	POLK
regulation of macroautophagy (GO:0016241)	0.184937	1	0	0	2.02696	3.42098	ATP6V1A;VPS35;VPS26A
regulation of tumor necrosis factor production (GO:0032680)	0.184948	1	0	0	2.55004	4.30366	LBP;LTF
positive regulation of MAP kinase activity (GO:0043406)	0.189261	1	0	0	1.77644	2.95711	GHR;PIK3CB;STK3;ROBO1
positive regulation of catabolic process (GO:0009896)	0.189516	1	0	0	2.50957	4.17411	GSK3B;IDE
negative regulation of intrinsic apoptotic signaling pathway (GO:2001243)	0.189516	1	0	0	2.50957	4.17411	VNN1;OPA1
regulation of translational initiation (GO:0006446)	0.189516	1	0	0	2.50957	4.17411	EIF5;UHMK1
vesicle coating (GO:0006901)	0.1941	1	0	0	2.47036	4.04986	SEC23IP;SAR1B
COPII vesicle coating (GO:0048208)	0.1941	1	0	0	2.47036	4.04986	SEC23IP;SAR1B
vesicle targeting, rough ER to cis-Golgi (GO:0048207)	0.1941	1	0	0	2.47036	4.04986	SEC23IP;SAR1B
negative regulation of neuron apoptotic process (GO:0043524)	0.1941	1	0	0	2.47036	4.04986	HIF1A;RETREG1
positive regulation of cell projection organization (GO:0031346)	0.1941	1	0	0	2.47036	4.04986	TWF1;S100A9
regulation of neuron projection development (GO:0010975)	0.194524	1	0	0	1.97628	3.23557	DCC;TWF1;S100A9
regulation of cellular protein catabolic process (GO:1903362)	0.194674	1	0	0	4.65008	7.60952	VPS35
regulation of collagen biosynthetic process (GO:0032965)	0.194674	1	0	0	4.65008	7.60952	SUCO
positive regulation of cell cycle G2/M phase transition (GO:1902751)	0.194674	1	0	0	4.65008	7.60952	RAB11A
embryo development ending in birth or egg hatching (GO:0009792)	0.194674	1	0	0	4.65008	7.60952	UBR3
positive regulation of G-protein coupled receptor protein signaling pathway (GO:0045745)	0.194674	1	0	0	4.65008	7.60952	VPS35
positive regulation of macrophage activation (GO:0043032)	0.194674	1	0	0	4.65008	7.60952	LBP
RNA stabilization (GO:0043489)	0.194674	1	0	0	4.65008	7.60952	SLC11A1
regulation of mitochondrial outer membrane permeabilization involved in apoptotic signaling pathway (GO:1901028)	0.194674	1	0	0	4.65008	7.60952	GSK3B
regulation of lamellipodium organization (GO:1902743)	0.194674	1	0	0	4.65008	7.60952	TWF1
positive chemotaxis (GO:0050918)	0.194674	1	0	0	4.65008	7.60952	FGF7
positive regulation of leukocyte activation (GO:0002696)	0.194674	1	0	0	4.65008	7.60952	LBP
positive regulation of cellular protein catabolic process (GO:1903364)	0.194674	1	0	0	4.65008	7.60952	VPS35
negative regulation of phosphoprotein phosphatase activity (GO:0032515)	0.194674	1	0	0	4.65008	7.60952	GSK3B
glycerophospholipid metabolic process (GO:0006650)	0.198698	1	0	0	2.43235	3.93061	PNPLA3;FAR1
positive regulation of JAK-STAT cascade (GO:0046427)	0.198698	1	0	0	2.43235	3.93061	GHR;CYP1B1
negative regulation of neuron differentiation (GO:0045665)	0.198698	1	0	0	2.43235	3.93061	GSK3B;DCC
Golgi organization (GO:0007030)	0.200983	1	0	0	1.94389	3.11904	SEC23IP;UBXN2B;ARL1
glycolipid metabolic process (GO:0006664)	0.203308	1	0	0	2.3955	3.8161	POGLUT1;SCCPDH
modulation by virus of host morphology or physiology (GO:0019048)	0.20487	1	0	0	4.39174	6.96257	KPNA1
regulation of multicellular organism growth (GO:0040014)	0.20487	1	0	0	4.39174	6.96257	GHR
regulation of adherens junction organization (GO:1903391)	0.20487	1	0	0	4.39174	6.96257	GPM6B
long-chain fatty-acyl-CoA biosynthetic process (GO:0035338)	0.20487	1	0	0	4.39174	6.96257	ACSL6
retrograde protein transport, ER to cytosol (GO:0030970)	0.20487	1	0	0	4.39174	6.96257	SEL1L
membrane protein ectodomain proteolysis (GO:0006509)	0.20487	1	0	0	4.39174	6.96257	SPPL2A
regulation of viral process (GO:0050792)	0.20487	1	0	0	4.39174	6.96257	LTF
regulation of spindle organization (GO:0090224)	0.20487	1	0	0	4.39174	6.96257	SENP6
nuclear envelope reassembly (GO:0031468)	0.20487	1	0	0	4.39174	6.96257	UBXN2B
regulation of keratinocyte proliferation (GO:0010837)	0.20487	1	0	0	4.39174	6.96257	FGF7
regulation of lipid catabolic process (GO:0050994)	0.20487	1	0	0	4.39174	6.96257	PDE3B
negative regulation of osteoclast differentiation (GO:0045671)	0.20487	1	0	0	4.39174	6.96257	LTF
acute-phase response (GO:0006953)	0.20487	1	0	0	4.39174	6.96257	LBP
regulation of cAMP-mediated signaling (GO:0043949)	0.20487	1	0	0	4.39174	6.96257	PDE3B
blood vessel endothelial cell migration (GO:0043534)	0.20487	1	0	0	4.39174	6.96257	ROBO1
positive regulation of carbohydrate metabolic process (GO:0045913)	0.20487	1	0	0	4.39174	6.96257	HIF1A
regulation of lipopolysaccharide-mediated signaling pathway (GO:0031664)	0.20487	1	0	0	4.39174	6.96257	LTF
regulation of oxidative stress-induced intrinsic apoptotic signaling pathway (GO:1902175)	0.20487	1	0	0	4.39174	6.96257	VNN1
negative regulation of protein dephosphorylation (GO:0035308)	0.20487	1	0	0	4.39174	6.96257	GSK3B
transmembrane transport (GO:0055085)	0.205686	1	0	0	1.46005	2.30893	MRS2;ATP6V1A;ABCD2;PEX3;SEL1L;LRRC8D;ATP2B1
platelet degranulation (GO:0002576)	0.210764	1	0	0	1.89723	2.95402	FAM49B;SCCPDH;KNG1
extrinsic apoptotic signaling pathway (GO:0097191)	0.212565	1	0	0	2.32504	3.60035	GSK3B;DCC
insulin receptor signaling pathway (GO:0008286)	0.212565	1	0	0	2.32504	3.60035	ATP6V1A;IDE
negative regulation of multicellular organismal process (GO:0051241)	0.214048	1	0	0	1.88218	2.90148	GSK3B;SLC11A1;ROBO1
primary alcohol metabolic process (GO:0034308)	0.214938	1	0	0	4.1606	6.39653	CYP1B1
macromolecule biosynthetic process (GO:0009059)	0.214938	1	0	0	4.1606	6.39653	SLC11A1
organelle fusion (GO:0048284)	0.214938	1	0	0	4.1606	6.39653	OPA1
positive regulation of immunoglobulin production (GO:0002639)	0.214938	1	0	0	4.1606	6.39653	TFRC
NADP metabolic process (GO:0006739)	0.214938	1	0	0	4.1606	6.39653	ME1
positive regulation of phospholipase activity (GO:0010518)	0.214938	1	0	0	4.1606	6.39653	ARL1
positive regulation of STAT cascade (GO:1904894)	0.214938	1	0	0	4.1606	6.39653	CYP1B1
negative regulation of double-strand break repair (GO:2000780)	0.214938	1	0	0	4.1606	6.39653	POLK
protein exit from endoplasmic reticulum (GO:0032527)	0.214938	1	0	0	4.1606	6.39653	SEL1L
positive regulation of pri-miRNA transcription from RNA polymerase II promoter (GO:1902895)	0.214938	1	0	0	4.1606	6.39653	HIF1A
acylglycerol biosynthetic process (GO:0046463)	0.214938	1	0	0	4.1606	6.39653	PNPLA3
aspartate family amino acid catabolic process (GO:0009068)	0.214938	1	0	0	4.1606	6.39653	DLD
negative regulation of calcium ion transport (GO:0051926)	0.214938	1	0	0	4.1606	6.39653	SLC30A1
purine ribonucleoside bisphosphate metabolic process (GO:0034035)	0.214938	1	0	0	4.1606	6.39653	IMPAD1
hexose transmembrane transport (GO:0035428)	0.214938	1	0	0	4.1606	6.39653	SLC2A10
negative regulation of lipid metabolic process (GO:0045833)	0.214938	1	0	0	4.1606	6.39653	PDE3B
osteoclast differentiation (GO:0030316)	0.214938	1	0	0	4.1606	6.39653	GLO1
protein heterotetramerization (GO:0051290)	0.214938	1	0	0	4.1606	6.39653	CBR4
innate immune response in mucosa (GO:0002227)	0.214938	1	0	0	4.1606	6.39653	LTF
triglyceride biosynthetic process (GO:0019432)	0.214938	1	0	0	4.1606	6.39653	PNPLA3
mitochondrial membrane organization (GO:0007006)	0.214938	1	0	0	4.1606	6.39653	OPA1
purine ribonucleotide catabolic process (GO:0009154)	0.214938	1	0	0	4.1606	6.39653	PDE3B
folic acid metabolic process (GO:0046655)	0.214938	1	0	0	4.1606	6.39653	ALDH1L2
monocarboxylic acid biosynthetic process (GO:0072330)	0.217208	1	0	0	2.29134	3.49865	ACSM3;CBR4
positive regulation of T cell activation (GO:0050870)	0.217208	1	0	0	2.29134	3.49865	FAM49B;TFRC
COPII-coated vesicle budding (GO:0090114)	0.217208	1	0	0	2.29134	3.49865	SEC23IP;SAR1B
response to organic cyclic compound (GO:0014070)	0.221861	1	0	0	2.25861	3.4008	HLCS;CYP1B1
regulation of osteoblast differentiation (GO:0045667)	0.221861	1	0	0	2.25861	3.4008	SUCO;LTF
positive regulation of mitochondrion organization (GO:0010822)	0.223963	1	0	0	1.8384	2.75076	GSK3B;VPS35;DDHD1
vacuolar acidification (GO:0007035)	0.224878	1	0	0	3.95257	5.89801	SLC11A1
regulation of endoplasmic reticulum stress-induced intrinsic apoptotic signaling pathway (GO:1902235)	0.224878	1	0	0	3.95257	5.89801	OPA1
covalent chromatin modification (GO:0016569)	0.224878	1	0	0	3.95257	5.89801	HLCS
regulation of toll-like receptor signaling pathway (GO:0034121)	0.224878	1	0	0	3.95257	5.89801	LGR4
negative regulation of ion transport (GO:0043271)	0.224878	1	0	0	3.95257	5.89801	GPM6B
endoplasmic reticulum mannose trimming (GO:1904380)	0.224878	1	0	0	3.95257	5.89801	SEL1L
negative regulation of response to biotic stimulus (GO:0002832)	0.224878	1	0	0	3.95257	5.89801	LTF
excitatory postsynaptic potential (GO:0060079)	0.224878	1	0	0	3.95257	5.89801	GSK3B
cellular response to estradiol stimulus (GO:0071392)	0.224878	1	0	0	3.95257	5.89801	NRIP1
dopaminergic neuron differentiation (GO:0071542)	0.224878	1	0	0	3.95257	5.89801	CDNF
growth hormone receptor signaling pathway (GO:0060396)	0.224878	1	0	0	3.95257	5.89801	GHR
positive regulation of interferon-alpha production (GO:0032727)	0.224878	1	0	0	3.95257	5.89801	TLR7
regulation of glycogen biosynthetic process (GO:0005979)	0.224878	1	0	0	3.95257	5.89801	GSK3B
regulation of transport (GO:0051049)	0.224878	1	0	0	3.95257	5.89801	RAB11A
organelle disassembly (GO:1903008)	0.224878	1	0	0	3.95257	5.89801	RETREG1
mitochondrial RNA metabolic process (GO:0000959)	0.224878	1	0	0	3.95257	5.89801	TFAM
phospholipid metabolic process (GO:0006644)	0.226521	1	0	0	2.2268	3.30661	PNPLA3;PIP4K2A
Rab protein signal transduction (GO:0032482)	0.226521	1	0	0	2.2268	3.30661	RAB31;RAB11A
vascular endothelial growth factor receptor signaling pathway (GO:0048010)	0.226521	1	0	0	2.2268	3.30661	CYBB;PIK3CB
positive regulation of proteasomal ubiquitin-dependent protein catabolic process (GO:0032436)	0.226521	1	0	0	2.2268	3.30661	GSK3B;ANKIB1
protein ubiquitination involved in ubiquitin-dependent protein catabolic process (GO:0042787)	0.226521	1	0	0	2.2268	3.30661	ANKIB1;CUL5
protein localization to plasma membrane (GO:0072659)	0.230623	1	0	0	1.81034	2.65571	RAB31;P2RY1;RAB11A
response to insulin (GO:0032868)	0.231189	1	0	0	2.19587	3.2159	RAB31;PDE3B
positive regulation of transcription from RNA polymerase II promoter involved in cellular response to chemical stimulus (GO:1901522)	0.234693	1	0	0	3.76435	5.45634	HIF1A
epoxygenase P450 pathway (GO:0019373)	0.234693	1	0	0	3.76435	5.45634	CYP1B1
mRNA transcription (GO:0009299)	0.234693	1	0	0	3.76435	5.45634	HIF1A
negative regulation of viral process (GO:0048525)	0.234693	1	0	0	3.76435	5.45634	LTF
positive regulation of leukocyte cell-cell adhesion (GO:1903039)	0.234693	1	0	0	3.76435	5.45634	FAM49B
limb morphogenesis (GO:0035108)	0.234693	1	0	0	3.76435	5.45634	MBNL1
positive regulation of T cell mediated immunity (GO:0002711)	0.234693	1	0	0	3.76435	5.45634	FAM49B
mitochondrial fission (GO:0000266)	0.234693	1	0	0	3.76435	5.45634	OPA1
positive regulation of translational initiation (GO:0045948)	0.234693	1	0	0	3.76435	5.45634	UHMK1
protein O-linked glycosylation via threonine (GO:0018243)	0.234693	1	0	0	3.76435	5.45634	GALNT13
regulation of macrophage activation (GO:0043030)	0.234693	1	0	0	3.76435	5.45634	LBP
glutamate metabolic process (GO:0006536)	0.234693	1	0	0	3.76435	5.45634	GCLM
lipid biosynthetic process (GO:0008610)	0.235863	1	0	0	2.16579	3.1285	ACSM3;CBR4
lymphocyte differentiation (GO:0030098)	0.240542	1	0	0	2.13652	3.04425	TPD52;LEPR
cellular response to organic substance (GO:0071310)	0.240681	1	0	0	1.76981	2.52071	GHR;MME;CYP1B1
STAT cascade (GO:0097696)	0.244385	1	0	0	3.59324	5.06293	GHR
regulation of vascular endothelial growth factor receptor signaling pathway (GO:0030947)	0.244385	1	0	0	3.59324	5.06293	HIF1A
regulation of calcium ion import (GO:0090279)	0.244385	1	0	0	3.59324	5.06293	SLC30A1
beta-catenin destruction complex disassembly (GO:1904886)	0.244385	1	0	0	3.59324	5.06293	GSK3B
negative regulation of protein polymerization (GO:0032272)	0.244385	1	0	0	3.59324	5.06293	TWF1
peptidyl-S-diacylglycerol-L-cysteine biosynthetic process from peptidyl-cysteine (GO:0018231)	0.244385	1	0	0	3.59324	5.06293	ZDHHC2
peptidyl-L-cysteine S-palmitoylation (GO:0018230)	0.244385	1	0	0	3.59324	5.06293	ZDHHC2
positive regulation of proteolysis involved in cellular protein catabolic process (GO:1903052)	0.244385	1	0	0	3.59324	5.06293	TMTC3
cellular response to unfolded protein (GO:0034620)	0.244385	1	0	0	3.59324	5.06293	HSPA13
sulfur amino acid metabolic process (GO:0000096)	0.244385	1	0	0	3.59324	5.06293	PCYOX1
DNA catabolic process, endonucleolytic (GO:0000737)	0.244385	1	0	0	3.59324	5.06293	KPNA1
negative regulation of actin filament polymerization (GO:0030837)	0.244385	1	0	0	3.59324	5.06293	TWF1
positive regulation of erythrocyte differentiation (GO:0045648)	0.244385	1	0	0	3.59324	5.06293	HIF1A
protein localization to cell surface (GO:0034394)	0.244385	1	0	0	3.59324	5.06293	FGF7
triglyceride catabolic process (GO:0019433)	0.244385	1	0	0	3.59324	5.06293	PNPLA3
glucose transport (GO:0015758)	0.244385	1	0	0	3.59324	5.06293	SLC2A10
positive regulation of defense response (GO:0031349)	0.245225	1	0	0	2.10804	2.96301	TLR7;S100A9
nitrogen compound transport (GO:0071705)	0.245225	1	0	0	2.10804	2.96301	COL4A3BP;SLC11A1
mitochondrial transport (GO:0006839)	0.247426	1	0	0	1.74378	2.43544	MRS2;SLC25A16;VPS35
regulation of actin cytoskeleton organization (GO:0032956)	0.249912	1	0	0	2.0803	2.88464	TWF1;GPM6B
positive regulation of ATP metabolic process (GO:1903580)	0.253954	1	0	0	3.43702	4.71079	HIF1A
regulation of protein oligomerization (GO:0032459)	0.253954	1	0	0	3.43702	4.71079	IDE
cellular nitrogen compound biosynthetic process (GO:0044271)	0.253954	1	0	0	3.43702	4.71079	CYP1B1
cholesterol efflux (GO:0033344)	0.253954	1	0	0	3.43702	4.71079	SOAT1
apoptotic nuclear changes (GO:0030262)	0.253954	1	0	0	3.43702	4.71079	KPNA1
melanosome organization (GO:0032438)	0.253954	1	0	0	3.43702	4.71079	BLOC1S6
folic acid-containing compound metabolic process (GO:0006760)	0.253954	1	0	0	3.43702	4.71079	ALDH1L2
positive regulation of protein oligomerization (GO:0032461)	0.253954	1	0	0	3.43702	4.71079	IDE
glutamine family amino acid metabolic process (GO:0009064)	0.253954	1	0	0	3.43702	4.71079	GCLM
protein localization to Golgi apparatus (GO:0034067)	0.253954	1	0	0	3.43702	4.71079	ARL1
negative regulation of axonogenesis (GO:0050771)	0.253954	1	0	0	3.43702	4.71079	DCC
protein K48-linked deubiquitination (GO:0071108)	0.253954	1	0	0	3.43702	4.71079	USP25
regulation of monooxygenase activity (GO:0032768)	0.253954	1	0	0	3.43702	4.71079	LYPLA1
negative regulation of transcription factor import into nucleus (GO:0042992)	0.253954	1	0	0	3.43702	4.71079	GSK3B
cellular response to amyloid-beta (GO:1904646)	0.253954	1	0	0	3.43702	4.71079	GSK3B
positive regulation of monooxygenase activity (GO:0032770)	0.253954	1	0	0	3.43702	4.71079	HIF1A
regulation of microtubule cytoskeleton organization (GO:0070507)	0.253954	1	0	0	3.43702	4.71079	GSK3B
NAD metabolic process (GO:0019674)	0.253954	1	0	0	3.43702	4.71079	NMNAT1
peroxisome organization (GO:0007031)	0.253954	1	0	0	3.43702	4.71079	PEX3
regulation of cytosolic calcium ion concentration (GO:0051480)	0.254201	1	0	0	1.71851	2.35372	P2RY1;ATP2B1;KNG1
positive regulation of apoptotic signaling pathway (GO:2001235)	0.254601	1	0	0	2.05328	2.80901	GSK3B;S100A9
ERAD pathway (GO:0036503)	0.259292	1	0	0	2.02696	2.73599	SEL1L;STT3B
regulation of primary metabolic process (GO:0080090)	0.261002	1	0	0	1.69396	2.27537	ALAS1;HMGCS1;ME1
visual perception (GO:0007601)	0.263985	1	0	0	2.0013	2.66546	OPA1;CYP1B1
positive regulation of signal transduction (GO:0009967)	0.267051	1	0	0	1.52756	2.01686	POGLUT1;ATP6AP2;HIF1A;ROBO1
activation of cysteine-type endopeptidase activity involved in apoptotic process (GO:0006919)	0.268677	1	0	0	1.97628	2.59732	S100A9;ROBO1
positive regulation of macromolecule biosynthetic process (GO:0010557)	0.271246	1	0	0	1.65842	2.16379	NAMPT;SUCO;HIF1A
cellular protein metabolic process (GO:0044267)	0.272525	1	0	0	1.30394	1.69516	ERO1A;USP25;SPPL2A;PLOD2;L2HGDH;ZDHHC2;KNG1;LTF
membrane protein intracellular domain proteolysis (GO:0031293)	0.272731	1	0	0	3.16206	4.10836	SPPL2A
positive regulation of immune effector process (GO:0002699)	0.272731	1	0	0	3.16206	4.10836	LBP
negative regulation of cytoskeleton organization (GO:0051494)	0.272731	1	0	0	3.16206	4.10836	TWF1
mucosal immune response (GO:0002385)	0.272731	1	0	0	3.16206	4.10836	LTF
limb development (GO:0060173)	0.272731	1	0	0	3.16206	4.10836	LNPK
Golgi to plasma membrane protein transport (GO:0043001)	0.272731	1	0	0	3.16206	4.10836	RAB31
negative regulation of developmental growth (GO:0048640)	0.272731	1	0	0	3.16206	4.10836	DCC
negative regulation of sequestering of calcium ion (GO:0051283)	0.272731	1	0	0	3.16206	4.10836	ERO1A
camera-type eye development (GO:0043010)	0.272731	1	0	0	3.16206	4.10836	CYP1B1
intrinsic apoptotic signaling pathway in response to endoplasmic reticulum stress (GO:0070059)	0.272731	1	0	0	3.16206	4.10836	ERO1A
protein alpha-1,2-demannosylation (GO:0036508)	0.272731	1	0	0	3.16206	4.10836	SEL1L
transition metal ion homeostasis (GO:0055076)	0.272731	1	0	0	3.16206	4.10836	SLC11A1
negative regulation of oxidative stress-induced cell death (GO:1903202)	0.272731	1	0	0	3.16206	4.10836	VNN1
cellular senescence (GO:0090398)	0.272731	1	0	0	3.16206	4.10836	OPA1
cAMP metabolic process (GO:0046058)	0.272731	1	0	0	3.16206	4.10836	PDE3B
regulation of hydrolase activity (GO:0051336)	0.273369	1	0	0	1.95189	2.53146	VMA21;PRKG1
positive regulation of binding (GO:0051099)	0.27806	1	0	0	1.92808	2.46779	GSK3B;STK3
epidermis development (GO:0008544)	0.27806	1	0	0	1.92808	2.46779	FGF7;CRABP2
sensory perception of light stimulus (GO:0050953)	0.27806	1	0	0	1.92808	2.46779	OPA1;CYP1B1
negative regulation of cell death (GO:0060548)	0.27806	1	0	0	1.92808	2.46779	GSK3B;VPS35
negative regulation of wound healing (GO:0061045)	0.281943	1	0	0	3.04044	3.84935	KNG1
signal peptide processing (GO:0006465)	0.281943	1	0	0	3.04044	3.84935	SPPL2A
regulation of spindle assembly (GO:0090169)	0.281943	1	0	0	3.04044	3.84935	SENP6
protein import into nucleus, translocation (GO:0000060)	0.281943	1	0	0	3.04044	3.84935	TNPO1
lamellipodium organization (GO:0097581)	0.281943	1	0	0	3.04044	3.84935	SNX2
neutral amino acid transport (GO:0015804)	0.281943	1	0	0	3.04044	3.84935	SLC36A4
positive regulation of Rho protein signal transduction (GO:0035025)	0.281943	1	0	0	3.04044	3.84935	ROBO1
prostaglandin metabolic process (GO:0006693)	0.281943	1	0	0	3.04044	3.84935	CYP4F8
in utero embryonic development (GO:0001701)	0.281943	1	0	0	3.04044	3.84935	MBNL1
response to amyloid-beta (GO:1904645)	0.281943	1	0	0	3.04044	3.84935	GSK3B
3'-phosphoadenosine 5'-phosphosulfate metabolic process (GO:0050427)	0.281943	1	0	0	3.04044	3.84935	IMPAD1
regulation of vascular smooth muscle cell proliferation (GO:1904705)	0.281943	1	0	0	3.04044	3.84935	PRKG1
positive regulation of leukocyte mediated cytotoxicity (GO:0001912)	0.281943	1	0	0	3.04044	3.84935	FAM49B
L-amino acid transport (GO:0015807)	0.281943	1	0	0	3.04044	3.84935	SLC36A4
monocarboxylic acid catabolic process (GO:0072329)	0.281943	1	0	0	3.04044	3.84935	ACBD5
regulation of lamellipodium assembly (GO:0010591)	0.281943	1	0	0	3.04044	3.84935	TWF1
regulation of glucose metabolic process (GO:0010906)	0.281943	1	0	0	3.04044	3.84935	PDK1
C-terminal protein amino acid modification (GO:0018410)	0.282749	1	0	0	1.90485	2.4062	FOLH1;VNN1
negative regulation of endopeptidase activity (GO:0010951)	0.287436	1	0	0	1.88218	2.34661	KNG1;LTF
positive regulation of homeostatic process (GO:0032846)	0.287436	1	0	0	1.88218	2.34661	PIK3CB;HIF1A
regulation of microtubule-based process (GO:0032886)	0.291038	1	0	0	2.92783	3.61383	GSK3B
positive regulation of interferon-beta production (GO:0032728)	0.291038	1	0	0	2.92783	3.61383	TLR7
regulation of pri-miRNA transcription from RNA polymerase II promoter (GO:1902893)	0.291038	1	0	0	2.92783	3.61383	HIF1A
phosphatidylethanolamine acyl-chain remodeling (GO:0036152)	0.291038	1	0	0	2.92783	3.61383	MBOAT2
regulation of NF-kappaB import into nucleus (GO:0042345)	0.291038	1	0	0	2.92783	3.61383	TLR7
T cell activation involved in immune response (GO:0002286)	0.291038	1	0	0	2.92783	3.61383	SLC11A1
negative chemotaxis (GO:0050919)	0.291038	1	0	0	2.92783	3.61383	ROBO1
cation transmembrane transport (GO:0098655)	0.291038	1	0	0	2.92783	3.61383	SLC36A4
regulation of peptidyl-tyrosine phosphorylation (GO:0050730)	0.296798	1	0	0	1.8384	2.23312	GHR;FGF7
phosphatidylcholine acyl-chain remodeling (GO:0036151)	0.300018	1	0	0	2.82326	3.39896	MBOAT2
mRNA polyadenylation (GO:0006378)	0.300018	1	0	0	2.82326	3.39896	GRSF1
phosphatidylinositol phosphorylation (GO:0046854)	0.300018	1	0	0	2.82326	3.39896	PIK3CB
negative regulation of smooth muscle cell proliferation (GO:0048662)	0.300018	1	0	0	2.82326	3.39896	PRKG1
negative regulation of synaptic transmission (GO:0050805)	0.300018	1	0	0	2.82326	3.39896	SLC30A1
regulation of double-strand break repair via homologous recombination (GO:0010569)	0.300018	1	0	0	2.82326	3.39896	POLK
regulation of protein localization to nucleus (GO:1900180)	0.300018	1	0	0	2.82326	3.39896	GSK3B
phagosome acidification (GO:0090383)	0.300018	1	0	0	2.82326	3.39896	ATP6V1A
regulation of neurotransmitter secretion (GO:0046928)	0.300018	1	0	0	2.82326	3.39896	SLC30A1
release of sequestered calcium ion into cytosol (GO:0051209)	0.300018	1	0	0	2.82326	3.39896	ERO1A
regulation of blood vessel diameter (GO:0097746)	0.300018	1	0	0	2.82326	3.39896	SCPEP1
regulation of protein localization to cell surface (GO:2000008)	0.300018	1	0	0	2.82326	3.39896	GPM6B
cellular response to topologically incorrect protein (GO:0035967)	0.300018	1	0	0	2.82326	3.39896	HSPA13
post-translational protein modification (GO:0043687)	0.300699	1	0	0	1.32488	1.59204	CUL5;STT3B;HIF1A;RAB11A;KNG1;FBXO30
calcium ion homeostasis (GO:0055074)	0.306141	1	0	0	1.79662	2.12668	SLC30A1;ATP2B1
RNA polyadenylation (GO:0043631)	0.308885	1	0	0	2.72591	3.20236	GRSF1
cellular response to hydrogen peroxide (GO:0070301)	0.308885	1	0	0	2.72591	3.20236	CYP1B1
hydrogen ion transmembrane transport (GO:1902600)	0.308885	1	0	0	2.72591	3.20236	NNT
negative regulation of proteasomal protein catabolic process (GO:1901799)	0.308885	1	0	0	2.72591	3.20236	USP25
cellular amino acid biosynthetic process (GO:0008652)	0.308885	1	0	0	2.72591	3.20236	FOLH1
dopamine receptor signaling pathway (GO:0007212)	0.308885	1	0	0	2.72591	3.20236	GSK3B
organelle fission (GO:0048285)	0.308885	1	0	0	2.72591	3.20236	OPA1
protein K63-linked deubiquitination (GO:0070536)	0.308885	1	0	0	2.72591	3.20236	USP25
proteasome-mediated ubiquitin-dependent protein catabolic process (GO:0043161)	0.310742	1	0	0	1.35362	1.5821	GSK3B;UBXN2B;SEL1L;UBR3;STT3B
regulation of proteasomal ubiquitin-dependent protein catabolic process (GO:0032434)	0.310805	1	0	0	1.77644	2.07593	GSK3B;ANKIB1
positive regulation of protein complex assembly (GO:0031334)	0.310805	1	0	0	1.77644	2.07593	GSK3B;IDE
Ras protein signal transduction (GO:0007265)	0.315076	1	0	0	1.41163	1.63035	RAB31;G3BP2;ARHGAP5;RAB11A
axonogenesis (GO:0007409)	0.315076	1	0	0	1.41163	1.63035	DCC;PIK3CB;S100B;ROBO1
peptidyl-threonine modification (GO:0018210)	0.315462	1	0	0	1.7567	2.02673	GSK3B;GALNT13
very long-chain fatty acid metabolic process (GO:0000038)	0.317641	1	0	0	2.63505	3.02196	ABCD2
collagen fibril organization (GO:0030199)	0.317641	1	0	0	2.63505	3.02196	CYP1B1
synaptic vesicle endocytosis (GO:0048488)	0.317641	1	0	0	2.63505	3.02196	CANX
coenzyme biosynthetic process (GO:0009108)	0.317641	1	0	0	2.63505	3.02196	SLC25A16
superoxide metabolic process (GO:0006801)	0.317641	1	0	0	2.63505	3.02196	CYBB
synaptic vesicle recycling (GO:0036465)	0.317641	1	0	0	2.63505	3.02196	CANX
positive regulation of myeloid cell differentiation (GO:0045639)	0.317641	1	0	0	2.63505	3.02196	HIF1A
amino acid transmembrane transport (GO:0003333)	0.317641	1	0	0	2.63505	3.02196	SLC36A4
regulation of embryonic development (GO:0045995)	0.317641	1	0	0	2.63505	3.02196	POGLUT1
positive regulation of transcription from RNA polymerase II promoter in response to stress (GO:0036003)	0.317641	1	0	0	2.63505	3.02196	HIF1A
carbohydrate derivative biosynthetic process (GO:1901137)	0.317641	1	0	0	2.63505	3.02196	SCCPDH
positive regulation of response to external stimulus (GO:0032103)	0.320111	1	0	0	1.73739	1.97904	TLR7;S100A9
regulation of protein catabolic process (GO:0042176)	0.324754	1	0	0	1.71851	1.93279	GSK3B;IDE
regulation of developmental growth (GO:0048638)	0.326286	1	0	0	2.55004	2.85601	GHR
hippo signaling (GO:0035329)	0.326286	1	0	0	2.55004	2.85601	STK3
acylglycerol catabolic process (GO:0046464)	0.326286	1	0	0	2.55004	2.85601	PNPLA3
cellular response to drug (GO:0035690)	0.326286	1	0	0	2.55004	2.85601	TFRC
phosphatidylinositol 3-kinase signaling (GO:0014065)	0.326286	1	0	0	2.55004	2.85601	PIK3CB
negative regulation of transferase activity (GO:0051348)	0.326286	1	0	0	2.55004	2.85601	GSK3B
response to estradiol (GO:0032355)	0.326286	1	0	0	2.55004	2.85601	NRIP1
regulation of blood coagulation (GO:0030193)	0.326286	1	0	0	2.55004	2.85601	KNG1
positive regulation of B cell proliferation (GO:0030890)	0.326286	1	0	0	2.55004	2.85601	TFRC
nuclear envelope organization (GO:0006998)	0.326286	1	0	0	2.55004	2.85601	UBXN2B
negative regulation of secretion by cell (GO:1903531)	0.326286	1	0	0	2.55004	2.85601	SLC30A1
protein palmitoylation (GO:0018345)	0.326286	1	0	0	2.55004	2.85601	ZDHHC2
axon guidance (GO:0007411)	0.326408	1	0	0	1.49154	1.66993	DCC;PIK3CB;ROBO1
positive regulation of cellular metabolic process (GO:0031325)	0.329388	1	0	0	1.70003	1.88792	STARD4;HIF1A
cotranslational protein targeting to membrane (GO:0006613)	0.334013	1	0	0	1.68194	1.84438	TRAM1;SRP54
negative regulation of toll-like receptor signaling pathway (GO:0034122)	0.334821	1	0	0	2.47036	2.70296	LGR4
nucleobase-containing small molecule interconversion (GO:0015949)	0.334821	1	0	0	2.47036	2.70296	AK4
renal water homeostasis (GO:0003091)	0.334821	1	0	0	2.47036	2.70296	RAB11A
secondary alcohol metabolic process (GO:1902652)	0.334821	1	0	0	2.47036	2.70296	SOAT1
skeletal system morphogenesis (GO:0048705)	0.334821	1	0	0	2.47036	2.70296	LTF
regulation of cytokine secretion (GO:0050707)	0.334821	1	0	0	2.47036	2.70296	LGR4
anterograde axonal transport (GO:0008089)	0.334821	1	0	0	2.47036	2.70296	BLOC1S6
proton transport (GO:0015992)	0.334821	1	0	0	2.47036	2.70296	NNT
cofactor biosynthetic process (GO:0051188)	0.334821	1	0	0	2.47036	2.70296	SLC25A16
axon development (GO:0061564)	0.338629	1	0	0	1.66424	1.80212	DCC;S100B
oxoacid metabolic process (GO:0043436)	0.343249	1	0	0	2.3955	2.5615	IMPAD1
G2 DNA damage checkpoint (GO:0031572)	0.343249	1	0	0	2.3955	2.5615	STK3
positive regulation of T cell differentiation (GO:0045582)	0.343249	1	0	0	2.3955	2.5615	VNN1
positive regulation of transcription factor import into nucleus (GO:0042993)	0.343249	1	0	0	2.3955	2.5615	TLR7
regulation of erythrocyte differentiation (GO:0045646)	0.343249	1	0	0	2.3955	2.5615	HIF1A
positive regulation of tumor necrosis factor superfamily cytokine production (GO:1903557)	0.343249	1	0	0	2.3955	2.5615	LBP
activation of protein kinase activity (GO:0032147)	0.343696	1	0	0	1.35131	1.44319	GHR;SLC11A1;PIK3CB;STK3
regulation of cell death (GO:0010941)	0.347832	1	0	0	1.62993	1.72126	DCC;VPS35
positive regulation of protein metabolic process (GO:0051247)	0.347832	1	0	0	1.62993	1.72126	GSK3B;IDE
cellular metal ion homeostasis (GO:0006875)	0.347832	1	0	0	1.62993	1.72126	SLC30A1;ATP2B1
regulation of DNA recombination (GO:0000018)	0.351571	1	0	0	2.32504	2.43047	KPNA1
positive regulation of biomineral tissue development (GO:0070169)	0.351571	1	0	0	2.32504	2.43047	GPM6B
glycogen metabolic process (GO:0005977)	0.351571	1	0	0	2.32504	2.43047	GSK3B
axonemal dynein complex assembly (GO:0070286)	0.351571	1	0	0	2.32504	2.43047	DNHD1
activation of MAPKK activity (GO:0000186)	0.351571	1	0	0	2.32504	2.43047	STK3
positive regulation of cytokine-mediated signaling pathway (GO:0001961)	0.351571	1	0	0	2.32504	2.43047	HIF1A
protein acetylation (GO:0006473)	0.351571	1	0	0	2.32504	2.43047	EHHADH
chemical synaptic transmission, postsynaptic (GO:0099565)	0.351571	1	0	0	2.32504	2.43047	GSK3B
oligosaccharide biosynthetic process (GO:0009312)	0.351571	1	0	0	2.32504	2.43047	GALNT13
positive regulation of nucleocytoplasmic transport (GO:0046824)	0.351571	1	0	0	2.32504	2.43047	GSK3B
negative regulation of mitochondrion organization (GO:0010823)	0.351571	1	0	0	2.32504	2.43047	OPA1
regulation of cell-substrate adhesion (GO:0010810)	0.351571	1	0	0	2.32504	2.43047	PIK3CB
positive regulation of Notch signaling pathway (GO:0045747)	0.351571	1	0	0	2.32504	2.43047	POGLUT1
negative regulation of multi-organism process (GO:0043901)	0.351571	1	0	0	2.32504	2.43047	LTF
positive regulation of cell-matrix adhesion (GO:0001954)	0.351571	1	0	0	2.32504	2.43047	GSK3B
platelet aggregation (GO:0070527)	0.351571	1	0	0	2.32504	2.43047	PIK3CB
regulation of autophagosome assembly (GO:2000785)	0.351571	1	0	0	2.32504	2.43047	PIP4K2A
positive regulation of intrinsic apoptotic signaling pathway (GO:2001244)	0.351571	1	0	0	2.32504	2.43047	S100A9
regulation of intracellular protein transport (GO:0033157)	0.351571	1	0	0	2.32504	2.43047	UHMK1
mRNA stabilization (GO:0048255)	0.351571	1	0	0	2.32504	2.43047	SLC11A1
regulation of postsynaptic membrane potential (GO:0060078)	0.351571	1	0	0	2.32504	2.43047	GSK3B
carboxylic acid metabolic process (GO:0019752)	0.351571	1	0	0	2.32504	2.43047	CYP4F8
cell morphogenesis involved in neuron differentiation (GO:0048667)	0.352417	1	0	0	1.61329	1.68257	DCC;S100B
antigen processing and presentation of exogenous peptide antigen via MHC class II (GO:0019886)	0.352417	1	0	0	1.61329	1.68257	SAR1B;CANX
negative regulation of cell motility (GO:2000146)	0.352417	1	0	0	1.61329	1.68257	CYP1B1;ROBO1
antigen processing and presentation of exogenous peptide antigen (GO:0002478)	0.352417	1	0	0	1.61329	1.68257	SAR1B;CANX
protein localization to organelle (GO:0033365)	0.352417	1	0	0	1.61329	1.68257	ARL1;RAB11A
regulation of inflammatory response (GO:0050727)	0.354058	1	0	0	1.42008	1.47446	VPS35;TLR7;S100A9
phosphatidylinositol biosynthetic process (GO:0006661)	0.356992	1	0	0	1.597	1.64498	PIP4K2A;PIK3CB
antigen processing and presentation of peptide antigen via MHC class II (GO:0002495)	0.356992	1	0	0	1.597	1.64498	SAR1B;CANX
positive regulation of neuron differentiation (GO:0045666)	0.356992	1	0	0	1.597	1.64498	TWF1;S100A9
mitochondrion organization (GO:0007005)	0.357508	1	0	0	1.41163	1.452	ALAS1;OPA1;TFAM
bone development (GO:0060348)	0.359787	1	0	0	2.25861	2.30885	LTF
embryonic limb morphogenesis (GO:0030326)	0.359787	1	0	0	2.25861	2.30885	MBNL1
apoptotic mitochondrial changes (GO:0008637)	0.359787	1	0	0	2.25861	2.30885	VPS35
endoplasmic reticulum organization (GO:0007029)	0.359787	1	0	0	2.25861	2.30885	TMEM33
anterior/posterior pattern specification (GO:0009952)	0.359787	1	0	0	2.25861	2.30885	ATP6AP2
macromolecule catabolic process (GO:0009057)	0.359787	1	0	0	2.25861	2.30885	CLPX
steroid metabolic process (GO:0008202)	0.361554	1	0	0	1.58103	1.60845	CYP1B1;MSMO1
defense response to bacterium (GO:0042742)	0.366647	1	0	0	1.30663	1.31102	SLC11A1;LBP;S100A9;LTF
lipid phosphorylation (GO:0046834)	0.3679	1	0	0	2.19587	2.19575	PIK3CB
antibacterial humoral response (GO:0019731)	0.3679	1	0	0	2.19587	2.19575	LTF
regulation of synapse assembly (GO:0051963)	0.3679	1	0	0	2.19587	2.19575	VPS35
regulation of mitochondrial membrane potential (GO:0051881)	0.3679	1	0	0	2.19587	2.19575	BCO2
negative regulation of protein complex assembly (GO:0031333)	0.3679	1	0	0	2.19587	2.19575	GSK3B
endothelial cell migration (GO:0043542)	0.3679	1	0	0	2.19587	2.19575	CYP1B1
membrane protein proteolysis (GO:0033619)	0.3679	1	0	0	2.19587	2.19575	SPPL2A
regulation of phosphoprotein phosphatase activity (GO:0043666)	0.3679	1	0	0	2.19587	2.19575	GSK3B
negative regulation of tumor necrosis factor production (GO:0032720)	0.3679	1	0	0	2.19587	2.19575	LBP
protein processing (GO:0016485)	0.370643	1	0	0	1.55003	1.53842	SPPL2A;ZMPSTE24
positive regulation of protein kinase activity (GO:0045860)	0.374712	1	0	0	1.37083	1.34561	SLC11A1;STK3;LTF
protein acylation (GO:0043543)	0.375911	1	0	0	2.13652	2.09038	ZDHHC2
regulation of receptor-mediated endocytosis (GO:0048259)	0.375911	1	0	0	2.13652	2.09038	PIK3CB
epithelial cell migration (GO:0010631)	0.375911	1	0	0	2.13652	2.09038	CYP1B1
muscle cell differentiation (GO:0042692)	0.375911	1	0	0	2.13652	2.09038	MBNL1
carbohydrate biosynthetic process (GO:0016051)	0.375911	1	0	0	2.13652	2.09038	GALNT13
negative regulation of blood coagulation (GO:0030195)	0.375911	1	0	0	2.13652	2.09038	KNG1
inner mitochondrial membrane organization (GO:0007007)	0.375911	1	0	0	2.13652	2.09038	OPA1
calcium ion transmembrane import into cytosol (GO:0097553)	0.375911	1	0	0	2.13652	2.09038	ERO1A
regulation of cysteine-type endopeptidase activity (GO:2000116)	0.375911	1	0	0	2.13652	2.09038	LTF
vesicle-mediated transport in synapse (GO:0099003)	0.375911	1	0	0	2.13652	2.09038	CANX
positive regulation of angiogenesis (GO:0045766)	0.379681	1	0	0	1.52022	1.47222	CYP1B1;HIF1A
protein import into nucleus (GO:0006606)	0.379681	1	0	0	1.52022	1.47222	TNPO1;KPNA1
base-excision repair (GO:0006284)	0.38382	1	0	0	2.0803	1.99206	POLK
protein peptidyl-prolyl isomerization (GO:0000413)	0.38382	1	0	0	2.0803	1.99206	FKBP14
positive regulation of mitochondrial outer membrane permeabilization involved in apoptotic signaling pathway (GO:1901030)	0.38382	1	0	0	2.0803	1.99206	GSK3B
regulation of dendrite development (GO:0050773)	0.38382	1	0	0	2.0803	1.99206	DCC
positive regulation of axonogenesis (GO:0050772)	0.38382	1	0	0	2.0803	1.99206	ROBO1
positive regulation of vasculature development (GO:1904018)	0.384179	1	0	0	1.50574	1.44046	CYP1B1;HIF1A
positive regulation of gene expression (GO:0010628)	0.386865	1	0	0	1.12638	1.0697	GSK3B;EHF;FUBP3;SLC11A1;NRIP1;TFAM;VPS35;PIK3CB;FOXN2;HIF1A;ARNTL2
transmembrane receptor protein tyrosine kinase signaling pathway (GO:0007169)	0.38794	1	0	0	1.19473	1.1313	ATP6V1A;GHR;FGF7;CYBB;IDE;PIK3CB
cellular protein modification process (GO:0006464)	0.390085	1	0	0	1.10451	1.03978	ERO1A;GSK3B;USP25;GMFB;CUL5;PLOD2;PIK3CB;HIF1A;RAB11A;KNG1;FBXO30;STK3;HLCS;STT3B
T cell differentiation (GO:0030217)	0.39163	1	0	0	2.02696	1.90015	LEPR
positive regulation of neuron death (GO:1901216)	0.39163	1	0	0	2.02696	1.90015	GSK3B
DNA damage checkpoint (GO:0000077)	0.39163	1	0	0	2.02696	1.90015	STK3
homotypic cell-cell adhesion (GO:0034109)	0.39163	1	0	0	2.02696	1.90015	PIK3CB
positive regulation of innate immune response (GO:0045089)	0.39163	1	0	0	2.02696	1.90015	LBP
retina homeostasis (GO:0001895)	0.39163	1	0	0	2.02696	1.90015	LTF
regulation of angiogenesis (GO:0045765)	0.391825	1	0	0	1.33233	1.24831	PDE3B;CYP1B1;HIF1A
positive regulation of epithelial cell proliferation (GO:0050679)	0.397589	1	0	0	1.46391	1.35022	FGF7;HIF1A
negative regulation of response to external stimulus (GO:0032102)	0.397589	1	0	0	1.46391	1.35022	VPS35;LTF
regulation of alternative mRNA splicing, via spliceosome (GO:0000381)	0.39934	1	0	0	1.97628	1.81411	MBNL1
inositol lipid-mediated signaling (GO:0048017)	0.39934	1	0	0	1.97628	1.81411	PIK3CB
regulation of proteasomal protein catabolic process (GO:0061136)	0.39934	1	0	0	1.97628	1.81411	TMTC3
clathrin-dependent endocytosis (GO:0072583)	0.39934	1	0	0	1.97628	1.81411	CANX
regulation of plasma membrane bounded cell projection assembly (GO:0120032)	0.39934	1	0	0	1.97628	1.81411	TWF1
regulation of RNA metabolic process (GO:0051252)	0.39934	1	0	0	1.97628	1.81411	MBNL1
Golgi to plasma membrane transport (GO:0006893)	0.39934	1	0	0	1.97628	1.81411	RAB31
positive regulation of phagocytosis (GO:0050766)	0.39934	1	0	0	1.97628	1.81411	SLC11A1
alpha-amino acid catabolic process (GO:1901606)	0.39934	1	0	0	1.97628	1.81411	ALDH6A1
ERBB2 signaling pathway (GO:0038128)	0.39934	1	0	0	1.97628	1.81411	CUL5
regulation of coenzyme metabolic process (GO:0051196)	0.39934	1	0	0	1.97628	1.81411	ME1
regulation of cytokine production (GO:0001817)	0.402029	1	0	0	1.45048	1.32173	SLC11A1;LTF
positive regulation of cysteine-type endopeptidase activity involved in apoptotic process (GO:0043280)	0.406454	1	0	0	1.4373	1.29398	S100A9;ROBO1
peptidyl-proline modification (GO:0018208)	0.406954	1	0	0	1.92808	1.73345	FKBP14
androgen receptor signaling pathway (GO:0030521)	0.406954	1	0	0	1.92808	1.73345	NRIP1
intraciliary transport involved in cilium assembly (GO:0035735)	0.406954	1	0	0	1.92808	1.73345	TNPO1
regulation of release of cytochrome c from mitochondria (GO:0090199)	0.406954	1	0	0	1.92808	1.73345	OPA1
negative regulation of catabolic process (GO:0009895)	0.406954	1	0	0	1.92808	1.73345	PDE3B
negative regulation of cytokine-mediated signaling pathway (GO:0001960)	0.406954	1	0	0	1.92808	1.73345	ROBO1
neuron migration (GO:0001764)	0.406954	1	0	0	1.92808	1.73345	PEX13
negative regulation of epidermal growth factor receptor signaling pathway (GO:0042059)	0.406954	1	0	0	1.92808	1.73345	STAM2
positive regulation of cytokine biosynthetic process (GO:0042108)	0.406954	1	0	0	1.92808	1.73345	TLR7
positive regulation of Ras protein signal transduction (GO:0046579)	0.406954	1	0	0	1.92808	1.73345	ROBO1
positive regulation of mitotic cell cycle phase transition (GO:1901992)	0.406954	1	0	0	1.92808	1.73345	RAB11A
JAK-STAT cascade (GO:0007259)	0.406954	1	0	0	1.92808	1.73345	GHR
negative regulation of cytokine secretion (GO:0050710)	0.406954	1	0	0	1.92808	1.73345	LGR4
negative regulation of cytokine production (GO:0001818)	0.410863	1	0	0	1.42435	1.26695	SLC11A1;LGR4
cellular response to peptide hormone stimulus (GO:0071375)	0.410863	1	0	0	1.42435	1.26695	RAB31;PDE3B
regulation of phagocytosis (GO:0050764)	0.414471	1	0	0	1.88218	1.65773	SLC11A1
cellular response to peptide (GO:1901653)	0.414471	1	0	0	1.88218	1.65773	GSK3B
negative regulation of proteolysis (GO:0045861)	0.414471	1	0	0	1.88218	1.65773	KNG1
negative regulation of cell projection organization (GO:0031345)	0.414471	1	0	0	1.88218	1.65773	DCC
regulation of protein binding (GO:0043393)	0.415255	1	0	0	1.41163	1.24063	GSK3B;STK3
phosphatidylinositol metabolic process (GO:0046488)	0.419632	1	0	0	1.39914	1.21498	PIP4K2A;PIK3CB
glycolipid biosynthetic process (GO:0009247)	0.421894	1	0	0	1.8384	1.58655	SCCPDH
regulation of interleukin-6 production (GO:0032675)	0.421894	1	0	0	1.8384	1.58655	LBP
negative regulation of protein secretion (GO:0050709)	0.421894	1	0	0	1.8384	1.58655	LGR4
protein modification by small protein removal (GO:0070646)	0.423698	1	0	0	1.20689	1.0364	SENP6;USP25;HIF1A;STAM2
receptor-mediated endocytosis (GO:0006898)	0.42902	1	0	0	1.25478	1.06186	RAB31;TFRC;CANX
regulation of GTPase activity (GO:0043087)	0.42902	1	0	0	1.25478	1.06186	GSK3B;SNX13;PRKG1
regulation of B cell proliferation (GO:0030888)	0.429223	1	0	0	1.79662	1.51955	TFRC
mitotic metaphase plate congression (GO:0007080)	0.429223	1	0	0	1.79662	1.51955	RAB11A
negative regulation of ERBB signaling pathway (GO:1901185)	0.429223	1	0	0	1.79662	1.51955	STAM2
protein transmembrane import into intracellular organelle (GO:0044743)	0.429223	1	0	0	1.79662	1.51955	PEX3
response to hydrogen peroxide (GO:0042542)	0.429223	1	0	0	1.79662	1.51955	CYP1B1
positive regulation of interleukin-6 production (GO:0032755)	0.429223	1	0	0	1.79662	1.51955	LBP
peptidyl-lysine modification (GO:0018205)	0.43266	1	0	0	1.36295	1.14189	SENP6;PLOD2
protein O-linked glycosylation (GO:0006493)	0.43266	1	0	0	1.36295	1.14189	GALNT13;POGLUT1
ubiquitin-dependent protein catabolic process (GO:0006511)	0.435562	1	0	0	1.15572	0.960542	GSK3B;ANKIB1;UBXN2B;CUL5;UBR3
protein homooligomerization (GO:0051260)	0.435701	1	0	0	1.24164	1.03156	IDE;POLK;CBR4
regulation of focal adhesion assembly (GO:0051893)	0.436459	1	0	0	1.7567	1.45641	GPM6B
sprouting angiogenesis (GO:0002040)	0.436459	1	0	0	1.7567	1.45641	ROBO1
protein N-linked glycosylation via asparagine (GO:0018279)	0.436459	1	0	0	1.7567	1.45641	STT3B
carboxylic acid biosynthetic process (GO:0046394)	0.436459	1	0	0	1.7567	1.45641	FOLH1
negative regulation of immune system process (GO:0002683)	0.436459	1	0	0	1.7567	1.45641	LGR4
metaphase plate congression (GO:0051310)	0.436459	1	0	0	1.7567	1.45641	RAB11A
inorganic anion transport (GO:0015698)	0.436459	1	0	0	1.7567	1.45641	SLC11A1
unsaturated fatty acid metabolic process (GO:0033559)	0.436459	1	0	0	1.7567	1.45641	CYP1B1
positive regulation of macroautophagy (GO:0016239)	0.436459	1	0	0	1.7567	1.45641	PIP4K2A
regulation of T cell activation (GO:0050863)	0.436459	1	0	0	1.7567	1.45641	FAM49B
positive regulation of intracellular transport (GO:0032388)	0.436459	1	0	0	1.7567	1.45641	GSK3B
positive regulation of peptidyl-tyrosine phosphorylation (GO:0050731)	0.436969	1	0	0	1.35131	1.11874	GHR;FGF7
activation of MAPK activity (GO:0000187)	0.441259	1	0	0	1.33985	1.09617	GHR;PIK3CB
protein localization to cell periphery (GO:1990778)	0.441259	1	0	0	1.33985	1.09617	P2RY1;RAB11A
regulation of programmed cell death (GO:0043067)	0.443404	1	0	0	1.17549	0.955991	OPA1;TNFRSF9;TNFRSF11B;STK3
mitochondrial gene expression (GO:0140053)	0.443604	1	0	0	1.71851	1.39684	TFAM
protein complex subunit organization (GO:0071822)	0.443604	1	0	0	1.71851	1.39684	CYP1B1
positive regulation of blood vessel endothelial cell migration (GO:0043536)	0.443604	1	0	0	1.71851	1.39684	HIF1A
peptidyl-asparagine modification (GO:0018196)	0.443604	1	0	0	1.71851	1.39684	STT3B
positive regulation of protein serine/threonine kinase activity (GO:0071902)	0.445532	1	0	0	1.32859	1.07415	ROBO1;LTF
positive regulation of cell differentiation (GO:0045597)	0.448973	1	0	0	1.21618	0.973904	BLOC1S6;SUCO;LTF
protein complex disassembly (GO:0043241)	0.450658	1	0	0	1.68194	1.34059	GSK3B
intraciliary transport (GO:0042073)	0.450658	1	0	0	1.68194	1.34059	TNPO1
mitotic spindle assembly (GO:0090307)	0.450658	1	0	0	1.68194	1.34059	RAB11A
negative regulation of autophagy (GO:0010507)	0.450658	1	0	0	1.68194	1.34059	LEPR
regulation of DNA metabolic process (GO:0051052)	0.450658	1	0	0	1.68194	1.34059	KPNA1
positive regulation of nucleic acid-templated transcription (GO:1903508)	0.452864	1	0	0	1.10012	0.871474	EHF;FUBP3;NRIP1;TFAM;FOXN2;HIF1A;ARNTL2
negative regulation of I-kappaB kinase/NF-kappaB signaling (GO:0043124)	0.457624	1	0	0	1.6469	1.2874	G3BP2
positive regulation of organelle assembly (GO:1902117)	0.457624	1	0	0	1.6469	1.2874	PIP4K2A
regulation of intrinsic apoptotic signaling pathway (GO:2001242)	0.457624	1	0	0	1.6469	1.2874	S100A9
positive regulation of tumor necrosis factor production (GO:0032760)	0.457624	1	0	0	1.6469	1.2874	LBP
cellular response to heat (GO:0034605)	0.457624	1	0	0	1.6469	1.2874	HSPA13
regulation of organelle assembly (GO:1902115)	0.457624	1	0	0	1.6469	1.2874	SENP6
negative regulation of cell migration (GO:0030336)	0.458239	1	0	0	1.29592	1.01129	CYP1B1;ROBO1
endosome to lysosome transport (GO:0008333)	0.464502	1	0	0	1.61329	1.23706	VPS41
cytoplasmic microtubule organization (GO:0031122)	0.464502	1	0	0	1.61329	1.23706	RAB11A
cellular macromolecule catabolic process (GO:0044265)	0.464502	1	0	0	1.61329	1.23706	STT3B
amino acid transport (GO:0006865)	0.464502	1	0	0	1.61329	1.23706	SLC36A4
cellular response to mechanical stimulus (GO:0071260)	0.464502	1	0	0	1.61329	1.23706	TLR7
cellular calcium ion homeostasis (GO:0006874)	0.466617	1	0	0	1.27502	0.971881	SLC30A1;ATP2B1
tumor necrosis factor-mediated signaling pathway (GO:0033209)	0.466617	1	0	0	1.27502	0.971881	TNFRSF9;TNFRSF11B
protein heterooligomerization (GO:0051291)	0.471292	1	0	0	1.58103	1.18937	CBR4
cilium movement (GO:0003341)	0.471292	1	0	0	1.58103	1.18937	DNHD1
glutathione metabolic process (GO:0006749)	0.471292	1	0	0	1.58103	1.18937	GCLM
regulation of bone mineralization (GO:0030500)	0.477997	1	0	0	1.55003	1.14415	GPM6B
regulation of cellular protein metabolic process (GO:0032268)	0.477997	1	0	0	1.55003	1.14415	VPS35
myeloid leukocyte differentiation (GO:0002573)	0.477997	1	0	0	1.55003	1.14415	GLO1
blood circulation (GO:0008015)	0.477997	1	0	0	1.55003	1.14415	GCLM
regulation of blood vessel endothelial cell migration (GO:0043535)	0.477997	1	0	0	1.55003	1.14415	HIF1A
wound healing (GO:0042060)	0.477997	1	0	0	1.55003	1.14415	SLC11A1
double-strand break repair via nonhomologous end joining (GO:0006303)	0.477997	1	0	0	1.55003	1.14415	POLK
negative regulation of viral genome replication (GO:0045071)	0.477997	1	0	0	1.55003	1.14415	LTF
regulation of I-kappaB kinase/NF-kappaB signaling (GO:0043122)	0.48158	1	0	0	1.15685	0.845291	GOLT1B;S100B;LTF
positive regulation of protein kinase B signaling (GO:0051897)	0.483141	1	0	0	1.23518	0.898527	FGF7;PIK3CB
protein lipidation (GO:0006497)	0.483141	1	0	0	1.23518	0.898527	VNN1;ZDHHC2
negative regulation of neuron projection development (GO:0010977)	0.484617	1	0	0	1.52022	1.10124	DCC
arachidonic acid metabolic process (GO:0019369)	0.484617	1	0	0	1.52022	1.10124	CYP1B1
positive regulation of developmental growth (GO:0048639)	0.484617	1	0	0	1.52022	1.10124	GHR
carboxylic acid transport (GO:0046942)	0.484617	1	0	0	1.52022	1.10124	SLC16A7
regulation of mRNA stability (GO:0043488)	0.487222	1	0	0	1.2256	0.881251	SLC11A1;TNPO1
positive regulation of NF-kappaB transcription factor activity (GO:0051092)	0.487222	1	0	0	1.2256	0.881251	S100A9;LTF
plasma membrane bounded cell projection morphogenesis (GO:0120039)	0.491154	1	0	0	1.49154	1.06048	SNX2
B cell differentiation (GO:0030183)	0.491154	1	0	0	1.49154	1.06048	TPD52
positive regulation of cell-substrate adhesion (GO:0010811)	0.491154	1	0	0	1.49154	1.06048	GSK3B
neutrophil chemotaxis (GO:0030593)	0.497608	1	0	0	1.46391	1.02173	S100A9
monocarboxylic acid transport (GO:0015718)	0.497608	1	0	0	1.46391	1.02173	SLC16A7
positive regulation of tyrosine phosphorylation of STAT protein (GO:0042531)	0.497608	1	0	0	1.46391	1.02173	GHR
intracellular transport of virus (GO:0075733)	0.50398	1	0	0	1.4373	0.984862	KPNA1
transport of virus (GO:0046794)	0.50398	1	0	0	1.4373	0.984862	KPNA1
negative regulation of supramolecular fiber organization (GO:1902904)	0.50398	1	0	0	1.4373	0.984862	TWF1
negative regulation of cellular component organization (GO:0051129)	0.50398	1	0	0	1.4373	0.984862	GSK3B
positive regulation of cytosolic calcium ion concentration (GO:0007204)	0.507326	1	0	0	1.17987	0.800662	P2RY1;KNG1
regulation of canonical Wnt signaling pathway (GO:0060828)	0.510132	1	0	0	1.1082	0.745911	GSK3B;LGR4;STK3
regulation of cellular catabolic process (GO:0031329)	0.510272	1	0	0	1.41163	0.949761	PIP4K2A
regulation of axonogenesis (GO:0050770)	0.510272	1	0	0	1.41163	0.949761	ROBO1
regulation of RNA splicing (GO:0043484)	0.510272	1	0	0	1.41163	0.949761	MBNL1
cellular response to organic cyclic compound (GO:0071407)	0.515223	1	0	0	1.16252	0.770931	NRIP1;CYP1B1
positive regulation of sequence-specific DNA binding transcription factor activity (GO:0051091)	0.516366	1	0	0	1.09794	0.72567	S100A9;STK3;LTF
DNA-dependent DNA replication (GO:0006261)	0.516485	1	0	0	1.38687	0.916316	POLK
regulation of tumor necrosis factor-mediated signaling pathway (GO:0010803)	0.516485	1	0	0	1.38687	0.916316	SPPL2A
anion transport (GO:0006820)	0.516485	1	0	0	1.38687	0.916316	LRRC8D
granulocyte chemotaxis (GO:0071621)	0.516485	1	0	0	1.38687	0.916316	S100A9
chordate embryonic development (GO:0043009)	0.516485	1	0	0	1.38687	0.916316	MBNL1
cellular defense response (GO:0006968)	0.516485	1	0	0	1.38687	0.916316	LBP
phosphatidylinositol-mediated signaling (GO:0048015)	0.516485	1	0	0	1.38687	0.916316	PIK3CB
negative regulation of cellular catabolic process (GO:0031330)	0.516485	1	0	0	1.38687	0.916316	LEPR
autophagosome organization (GO:1905037)	0.516485	1	0	0	1.38687	0.916316	UBXN2B
I-kappaB kinase/NF-kappaB signaling (GO:0007249)	0.522619	1	0	0	1.36295	0.884426	TLR7
regulation of glycolytic process (GO:0006110)	0.522619	1	0	0	1.36295	0.884426	HIF1A
IRE1-mediated unfolded protein response (GO:0036498)	0.522619	1	0	0	1.36295	0.884426	FKBP14
positive regulation of cell death (GO:0010942)	0.522619	1	0	0	1.36295	0.884426	GSK3B
regulation of Rho protein signal transduction (GO:0035023)	0.522619	1	0	0	1.36295	0.884426	ROBO1
protein homotetramerization (GO:0051289)	0.522619	1	0	0	1.36295	0.884426	CBR4
response to cytokine (GO:0034097)	0.526912	1	0	0	1.13743	0.728777	MME;SLC11A1
neutrophil migration (GO:1990266)	0.528675	1	0	0	1.33985	0.853998	S100A9
positive regulation of cell morphogenesis involved in differentiation (GO:0010770)	0.528675	1	0	0	1.33985	0.853998	ROBO1
regulation of epidermal growth factor receptor signaling pathway (GO:0042058)	0.528675	1	0	0	1.33985	0.853998	STAM2
autophagosome assembly (GO:0000045)	0.528675	1	0	0	1.33985	0.853998	UBXN2B
ion transmembrane transport (GO:0034220)	0.528705	1	0	0	1.07797	0.68702	ATP6V1A;LRRC8D;ATP2B1
positive regulation of Wnt signaling pathway (GO:0030177)	0.534598	1	0	0	1.1213	0.702201	ATP6AP2;LGR4
regulation of protein metabolic process (GO:0051246)	0.534655	1	0	0	1.31752	0.824946	VPS35
renal system development (GO:0072001)	0.534655	1	0	0	1.31752	0.824946	MME
modification-dependent protein catabolic process (GO:0019941)	0.538409	1	0	0	1.1134	0.689347	UBR3;PCYOX1
regulation of mRNA splicing, via spliceosome (GO:0048024)	0.540559	1	0	0	1.29592	0.797189	MBNL1
cell chemotaxis (GO:0060326)	0.540559	1	0	0	1.29592	0.797189	PIK3CB
actin cytoskeleton reorganization (GO:0031532)	0.546389	1	0	0	1.27502	0.770654	FGF7
regulation of tyrosine phosphorylation of STAT protein (GO:0042509)	0.546389	1	0	0	1.27502	0.770654	GHR
regulation of vesicle fusion (GO:0031338)	0.546389	1	0	0	1.27502	0.770654	VPS41
positive regulation of T cell proliferation (GO:0042102)	0.546389	1	0	0	1.27502	0.770654	TFRC
negative regulation of viral life cycle (GO:1903901)	0.546389	1	0	0	1.27502	0.770654	LTF
cellular protein complex assembly (GO:0043623)	0.549713	1	0	0	1.09036	0.652429	TMEM33;SRP54
protein phosphorylation (GO:0006468)	0.550397	1	0	0	1.00702	0.60131	GSK3B;GMFB;TLR7;PIK3CB;UHMK1;STK3
negative regulation of peptidase activity (GO:0010466)	0.552145	1	0	0	1.25478	0.745272	KNG1
diterpenoid metabolic process (GO:0016101)	0.552145	1	0	0	1.25478	0.745272	BCO2
establishment of protein localization to organelle (GO:0072594)	0.552145	1	0	0	1.25478	0.745272	RAB11A
regulation of actin filament-based process (GO:0032970)	0.552145	1	0	0	1.25478	0.745272	GPM6B
regulation of T cell proliferation (GO:0042129)	0.552145	1	0	0	1.25478	0.745272	TFRC
peptidyl-serine phosphorylation (GO:0018105)	0.553438	1	0	0	1.0829	0.640648	GSK3B;UHMK1
skeletal system development (GO:0001501)	0.557141	1	0	0	1.07553	0.629117	IMPAD1;TNFRSF11B
kidney development (GO:0001822)	0.557828	1	0	0	1.23518	0.720979	MME
oligosaccharide metabolic process (GO:0009311)	0.557828	1	0	0	1.23518	0.720979	GALNT13
carbohydrate homeostasis (GO:0033500)	0.557828	1	0	0	1.23518	0.720979	LEPR
regulation of viral genome replication (GO:0045069)	0.557828	1	0	0	1.23518	0.720979	LTF
regulation of proteolysis (GO:0030162)	0.557828	1	0	0	1.23518	0.720979	KNG1
positive regulation of endocytosis (GO:0045807)	0.56344	1	0	0	1.21618	0.697714	SLC11A1
homophilic cell adhesion via plasma membrane adhesion molecules (GO:0007156)	0.56344	1	0	0	1.21618	0.697714	ROBO1
cellular response to decreased oxygen levels (GO:0036294)	0.56344	1	0	0	1.21618	0.697714	HIF1A
negative regulation of canonical Wnt signaling pathway (GO:0090090)	0.564481	1	0	0	1.06109	0.606784	GSK3B;STK3
apoptotic process (GO:0006915)	0.564645	1	0	0	1.02222	0.584255	DCC;TNFRSF9;STK3
positive regulation of intracellular signal transduction (GO:1902533)	0.568954	1	0	0	0.988142	0.557269	FGF7;GOLT1B;PIK3CB;S100B;S100A9;LTF
O-glycan processing (GO:0016266)	0.56898	1	0	0	1.19775	0.675422	GALNT13
regulation of JAK-STAT cascade (GO:0046425)	0.56898	1	0	0	1.19775	0.675422	CYP1B1
regulation of cell division (GO:0051302)	0.56898	1	0	0	1.19775	0.675422	RAB11A
cellular response to reactive oxygen species (GO:0034614)	0.56898	1	0	0	1.19775	0.675422	CYP1B1
negative regulation of apoptotic signaling pathway (GO:2001234)	0.56898	1	0	0	1.19775	0.675422	OPA1
defense response to Gram-positive bacterium (GO:0050830)	0.56898	1	0	0	1.19775	0.675422	LBP
negative regulation of blood vessel morphogenesis (GO:2000181)	0.56898	1	0	0	1.19775	0.675422	PDE3B
intracellular steroid hormone receptor signaling pathway (GO:0030518)	0.574451	1	0	0	1.17987	0.654051	NRIP1
sphingolipid biosynthetic process (GO:0030148)	0.574451	1	0	0	1.17987	0.654051	COL4A3BP
negative regulation of epithelial cell proliferation (GO:0050680)	0.574451	1	0	0	1.17987	0.654051	ROBO1
positive regulation of cellular protein localization (GO:1903829)	0.574451	1	0	0	1.17987	0.654051	GSK3B
protein stabilization (GO:0050821)	0.5789	1	0	0	1.03335	0.564857	SEL1L;STK3
positive regulation of endothelial cell proliferation (GO:0001938)	0.579852	1	0	0	1.16252	0.633553	HIF1A
negative regulation of protein binding (GO:0032091)	0.579852	1	0	0	1.16252	0.633553	GSK3B
positive regulation of autophagy (GO:0010508)	0.579852	1	0	0	1.16252	0.633553	PIK3CB
regulation of cardiac conduction (GO:1903779)	0.579852	1	0	0	1.16252	0.633553	ATP2B1
cellular response to UV (GO:0034644)	0.579852	1	0	0	1.16252	0.633553	MME
negative regulation of apoptotic process (GO:0043066)	0.581119	1	0	0	0.975943	0.529741	GSK3B;OPA1;API5;GLO1;RETREG1;LTF
proteasomal protein catabolic process (GO:0010498)	0.581981	1	0	0	0.996446	0.539394	GSK3B;UBXN2B;SEL1L
peptidyl-threonine phosphorylation (GO:0018107)	0.585185	1	0	0	1.14567	0.613883	GSK3B
negative regulation of phosphatase activity (GO:0010923)	0.585185	1	0	0	1.14567	0.613883	GSK3B
response to interferon-gamma (GO:0034341)	0.585185	1	0	0	1.14567	0.613883	SLC11A1
regulation of endopeptidase activity (GO:0052548)	0.585185	1	0	0	1.14567	0.613883	KNG1
regulation of actin filament polymerization (GO:0030833)	0.585185	1	0	0	1.14567	0.613883	TWF1
regulation of apoptotic process (GO:0042981)	0.586038	1	0	0	0.968767	0.51768	GSK3B;OPA1;API5;GLO1;TNFRSF9;CYP1B1;TNFRSF11B;KNG1;STK3;LTF
negative regulation of angiogenesis (GO:0016525)	0.59045	1	0	0	1.12931	0.594997	PDE3B
negative regulation of programmed cell death (GO:0043069)	0.59277	1	0	0	0.966398	0.505377	GSK3B;OPA1;API5;GLO1;LTF
positive regulation of endothelial cell migration (GO:0010595)	0.595649	1	0	0	1.1134	0.576856	HIF1A
regulation of Notch signaling pathway (GO:0008593)	0.595649	1	0	0	1.1134	0.576856	POGLUT1
stress-activated protein kinase signaling cascade (GO:0031098)	0.595649	1	0	0	1.1134	0.576856	STK3
negative regulation of developmental process (GO:0051093)	0.595649	1	0	0	1.1134	0.576856	ROBO1
phosphatidylcholine metabolic process (GO:0046470)	0.600783	1	0	0	1.09794	0.559423	MBOAT2
recombinational repair (GO:0000725)	0.600783	1	0	0	1.09794	0.559423	POLK
positive regulation of lymphocyte proliferation (GO:0050671)	0.600783	1	0	0	1.09794	0.559423	TFRC
positive regulation of growth (GO:0045927)	0.600783	1	0	0	1.09794	0.559423	S100A9
positive regulation of cellular biosynthetic process (GO:0031328)	0.603286	1	0	0	0.988142	0.499371	STARD4;HIF1A
negative regulation of cysteine-type endopeptidase activity (GO:2000117)	0.605851	1	0	0	1.0829	0.542662	LTF
Rho protein signal transduction (GO:0007266)	0.605851	1	0	0	1.0829	0.542662	ARHGAP5
regulation of epithelial cell proliferation (GO:0050678)	0.605851	1	0	0	1.0829	0.542662	FGF7
protein localization to membrane (GO:0072657)	0.606682	1	0	0	0.982005	0.490757	P2RY1;RAB11A
B cell activation (GO:0042113)	0.610855	1	0	0	1.06826	0.526541	TPD52
protein N-linked glycosylation (GO:0006487)	0.610855	1	0	0	1.06826	0.526541	STT3B
canonical Wnt signaling pathway (GO:0060070)	0.610855	1	0	0	1.06826	0.526541	GSK3B
glucose homeostasis (GO:0042593)	0.615796	1	0	0	1.05402	0.51103	LEPR
mRNA 3'-end processing (GO:0031124)	0.615796	1	0	0	1.05402	0.51103	GRSF1
mitotic spindle organization (GO:0007052)	0.615796	1	0	0	1.05402	0.51103	RAB11A
mitotic nuclear division (GO:0140014)	0.615796	1	0	0	1.05402	0.51103	RAB11A
neuron projection morphogenesis (GO:0048812)	0.616737	1	0	0	0.964041	0.465933	DCC;S100B
regulation of protein kinase B signaling (GO:0051896)	0.616737	1	0	0	0.964041	0.465933	FGF7;PIK3CB
antigen processing and presentation of exogenous peptide antigen via MHC class I, TAP-dependent (GO:0002479)	0.620675	1	0	0	1.04015	0.496098	CYBB
C-terminal protein lipidation (GO:0006501)	0.620675	1	0	0	1.04015	0.496098	VNN1
double-strand break repair via homologous recombination (GO:0000724)	0.625491	1	0	0	1.02664	0.481718	POLK
nucleic acid-templated transcription (GO:0097659)	0.625491	1	0	0	1.02664	0.481718	FUBP3
response to interleukin-1 (GO:0070555)	0.625491	1	0	0	1.02664	0.481718	HIF1A
positive regulation of cytoskeleton organization (GO:0051495)	0.630247	1	0	0	1.01348	0.467866	CFL2
regulation of cytokinesis (GO:0032465)	0.630247	1	0	0	1.01348	0.467866	RAB11A
antigen processing and presentation of exogenous peptide antigen via MHC class I (GO:0042590)	0.634943	1	0	0	1.00065	0.454516	CYBB
fibroblast growth factor receptor signaling pathway (GO:0008543)	0.634943	1	0	0	1.00065	0.454516	FGF7
regulation of transcription from RNA polymerase II promoter in response to hypoxia (GO:0061418)	0.634943	1	0	0	1.00065	0.454516	HIF1A
positive regulation of translation (GO:0045727)	0.634943	1	0	0	1.00065	0.454516	UHMK1
negative regulation of inflammatory response (GO:0050728)	0.634943	1	0	0	1.00065	0.454516	VPS35
regulation of cellular response to heat (GO:1900034)	0.634943	1	0	0	1.00065	0.454516	GSK3B
protein deubiquitination (GO:0016579)	0.636533	1	0	0	0.919202	0.415221	USP25;HIF1A;STAM2
positive regulation of programmed cell death (GO:0043068)	0.636533	1	0	0	0.919202	0.415221	CYP1B1;KNG1;STK3
steroid biosynthetic process (GO:0006694)	0.639579	1	0	0	0.988142	0.441645	MSMO1
regulation of endothelial cell proliferation (GO:0001936)	0.639579	1	0	0	0.988142	0.441645	HIF1A
cation transport (GO:0006812)	0.639579	1	0	0	0.988142	0.441645	SLC36A4
peptidyl-tyrosine phosphorylation (GO:0018108)	0.639579	1	0	0	0.988142	0.441645	GHR
regulation of phosphatidylinositol 3-kinase signaling (GO:0014066)	0.644157	1	0	0	0.975943	0.429233	PIP4K2A
regulation of protein serine/threonine kinase activity (GO:0071900)	0.644157	1	0	0	0.975943	0.429233	LTF
spindle assembly (GO:0051225)	0.644157	1	0	0	0.975943	0.429233	RAB11A
cellular response to hormone stimulus (GO:0032870)	0.644157	1	0	0	0.975943	0.429233	GHR
ERBB signaling pathway (GO:0038127)	0.644157	1	0	0	0.975943	0.429233	CUL5
negative regulation of defense response (GO:0031348)	0.644157	1	0	0	0.975943	0.429233	VPS35
positive regulation of hydrolase activity (GO:0051345)	0.645719	1	0	0	0.913889	0.399726	GSK3B;SNX13
regulation of protein phosphorylation (GO:0001932)	0.64683	1	0	0	0.905169	0.394356	ATP6AP2;P2RY1;TWF1
negative regulation of Wnt signaling pathway (GO:0030178)	0.65192	1	0	0	0.903444	0.386523	GSK3B;STK3
regulation of anatomical structure morphogenesis (GO:0022603)	0.653139	1	0	0	0.952426	0.405701	POGLUT1
negative regulation of NF-kappaB transcription factor activity (GO:0032088)	0.653139	1	0	0	0.952426	0.405701	CYP1B1
mitotic sister chromatid segregation (GO:0000070)	0.653139	1	0	0	0.952426	0.405701	RAB11A
negative regulation of binding (GO:0051100)	0.653139	1	0	0	0.952426	0.405701	GSK3B
protein autophosphorylation (GO:0046777)	0.654989	1	0	0	0.898311	0.380109	GSK3B;UHMK1
positive regulation of supramolecular fiber organization (GO:1902905)	0.661895	1	0	0	0.930016	0.383769	CFL2
cellular response to molecule of bacterial origin (GO:0071219)	0.661895	1	0	0	0.930016	0.383769	LBP
cellular response to lipid (GO:0071396)	0.664064	1	0	0	0.883256	0.361584	NRIP1;LBP
ER to Golgi vesicle-mediated transport (GO:0006888)	0.670007	1	0	0	0.873496	0.349806	SEC23IP;SAR1B
Golgi vesicle transport (GO:0048193)	0.671666	1	0	0	0.87189	0.347007	SEC23IP;SNX2;SAR1B
organonitrogen compound biosynthetic process (GO:1901566)	0.672947	1	0	0	0.868697	0.344081	COL4A3BP;FOLH1
mitochondrial translational elongation (GO:0070125)	0.674619	1	0	0	0.898311	0.353582	MRPS10
positive regulation of cellular component biogenesis (GO:0044089)	0.674619	1	0	0	0.898311	0.353582	GSK3B
regulation of MAP kinase activity (GO:0043405)	0.674619	1	0	0	0.898311	0.353582	ROBO1
T cell activation (GO:0042110)	0.678753	1	0	0	0.888218	0.344183	LEPR
phosphate-containing compound metabolic process (GO:0006796)	0.678763	1	0	0	0.859254	0.332947	PIP4K2A;PIK3CB
mitochondrial translational termination (GO:0070126)	0.682835	1	0	0	0.878349	0.335092	MRPS10
negative regulation of cellular protein metabolic process (GO:0032269)	0.682835	1	0	0	0.878349	0.335092	KNG1
SRP-dependent cotranslational protein targeting to membrane (GO:0006614)	0.682835	1	0	0	0.878349	0.335092	SRP54
regulation of neuron apoptotic process (GO:0043523)	0.682835	1	0	0	0.878349	0.335092	RETREG1
regulation of cell cycle process (GO:0010564)	0.686865	1	0	0	0.868697	0.326297	RAB11A
protein tetramerization (GO:0051262)	0.686865	1	0	0	0.868697	0.326297	CBR4
regulation of cytokine-mediated signaling pathway (GO:0001959)	0.686865	1	0	0	0.868697	0.326297	SPPL2A
nervous system development (GO:0007399)	0.687304	1	0	0	0.866791	0.325028	MBNL1;GMFB;S100B;GPM6B;ROBO1
cellular response to cytokine stimulus (GO:0071345)	0.689146	1	0	0	0.864895	0.322003	GSK3B;MME;PIK3CB;LBP;HIF1A
lipid transport (GO:0006869)	0.690844	1	0	0	0.859254	0.317787	LBP
positive regulation of cellular protein metabolic process (GO:0032270)	0.690844	1	0	0	0.859254	0.317787	VPS35
cellular response to lipopolysaccharide (GO:0071222)	0.690844	1	0	0	0.859254	0.317787	LBP
cytokine-mediated signaling pathway (GO:0019221)	0.694589	1	0	0	0.872807	0.318081	TNFRSF9;CANX;LEPR;TNFRSF11B;PIK3CB;LBP;HIF1A
cell cycle G1/S phase transition (GO:0044843)	0.694773	1	0	0	0.850015	0.30955	CUL5
regulation of transcription from RNA polymerase II promoter in response to stress (GO:0043618)	0.698652	1	0	0	0.840972	0.301574	HIF1A
cellular response to fibroblast growth factor stimulus (GO:0044344)	0.702482	1	0	0	0.83212	0.293851	FGF7
vesicle fusion (GO:0006906)	0.702482	1	0	0	0.83212	0.293851	VPS41
positive regulation of GTPase activity (GO:0043547)	0.7039	1	0	0	0.819185	0.287632	GSK3B;SNX13
regulation of heart contraction (GO:0008016)	0.706264	1	0	0	0.823452	0.286369	ATP2B1
cellular response to tumor necrosis factor (GO:0071356)	0.709259	1	0	0	0.810783	0.278532	TNFRSF9;TNFRSF11B
ciliary basal body-plasma membrane docking (GO:0097711)	0.709998	1	0	0	0.814963	0.27912	RAB11A
translational termination (GO:0006415)	0.709998	1	0	0	0.814963	0.27912	MRPS10
epithelial cell differentiation (GO:0030855)	0.709998	1	0	0	0.814963	0.27912	EHF
protein targeting to ER (GO:0045047)	0.713684	1	0	0	0.806647	0.272094	SRP54
positive regulation of cell growth (GO:0030307)	0.717324	1	0	0	0.798499	0.265284	S100A9
histone modification (GO:0016570)	0.717324	1	0	0	0.798499	0.265284	HLCS
small GTPase mediated signal transduction (GO:0007264)	0.720917	1	0	0	0.790514	0.25868	G3BP2
phosphorylation (GO:0016310)	0.724468	1	0	0	0.817069	0.263355	GSK3B;GMFB;PIK3CB;STK3
regulation of cellular response to stress (GO:0080135)	0.738214	1	0	0	0.75287	0.228512	GSK3B
positive regulation of lymphocyte activation (GO:0051251)	0.738214	1	0	0	0.75287	0.228512	FAM49B
translational elongation (GO:0006414)	0.741543	1	0	0	0.745768	0.223001	MRPS10
G1/S transition of mitotic cell cycle (GO:0000082)	0.741543	1	0	0	0.745768	0.223001	CUL5
positive regulation of phosphorylation (GO:0042327)	0.744547	1	0	0	0.756473	0.223144	P2RY1;HIF1A
positive regulation of cellular component organization (GO:0051130)	0.74483	1	0	0	0.738798	0.217649	GSK3B
RNA splicing (GO:0008380)	0.74483	1	0	0	0.738798	0.217649	MBNL1
viral life cycle (GO:0019058)	0.748075	1	0	0	0.731957	0.212452	KPNA1
mitochondrial translation (GO:0032543)	0.748075	1	0	0	0.731957	0.212452	MRPS10
positive regulation of apoptotic process (GO:0043065)	0.750408	1	0	0	0.769981	0.221091	CYP1B1;KNG1;STK3
regulation of protein activation cascade (GO:2000257)	0.75128	1	0	0	0.725242	0.207403	C7
nucleotide-excision repair (GO:0006289)	0.75128	1	0	0	0.725242	0.207403	SLC30A9
negative regulation of hydrolase activity (GO:0051346)	0.75128	1	0	0	0.725242	0.207403	LTF
positive regulation of transcription from RNA polymerase II promoter (GO:0045944)	0.751398	1	0	0	0.838001	0.239517	EHF;FUBP3;SLC11A1;NAMPT;TFEC;NRIP1;TFAM;HIF1A;ARNTL2
regulation of complement activation (GO:0030449)	0.754443	1	0	0	0.718649	0.202498	C7
regulation of Wnt signaling pathway (GO:0030111)	0.754443	1	0	0	0.718649	0.202498	ATP6AP2
macroautophagy (GO:0016236)	0.757567	1	0	0	0.712175	0.197731	STAM2
positive regulation of canonical Wnt signaling pathway (GO:0090263)	0.766701	1	0	0	0.693433	0.184216	LGR4
regulation of humoral immune response (GO:0002920)	0.766701	1	0	0	0.693433	0.184216	C7
regulation of immune effector process (GO:0002697)	0.76967	1	0	0	0.687403	0.179958	C7
protein ubiquitination (GO:0016567)	0.77184	1	0	0	0.779599	0.201899	ANKIB1;CUL5;UBR3;HIF1A;FBXO30
negative regulation of cell growth (GO:0030308)	0.7726	1	0	0	0.681477	0.175817	DCC
epithelium development (GO:0060429)	0.7726	1	0	0	0.681477	0.175817	EHF
positive regulation of cell migration (GO:0030335)	0.773976	1	0	0	0.712175	0.182469	HIF1A;RAB11A
chromatin remodeling (GO:0006338)	0.775493	1	0	0	0.675653	0.171789	TFAM
sphingolipid metabolic process (GO:0006665)	0.775493	1	0	0	0.675653	0.171789	COL4A3BP
positive regulation of B cell activation (GO:0050871)	0.783955	1	0	0	0.658762	0.160345	TFRC
enzyme linked receptor protein signaling pathway (GO:0007167)	0.786705	1	0	0	0.653317	0.156732	PIK3CB
DNA replication (GO:0006260)	0.786705	1	0	0	0.653317	0.156732	POLK
regulation of acute inflammatory response (GO:0002673)	0.789419	1	0	0	0.647962	0.153216	C7
extracellular matrix organization (GO:0030198)	0.790584	1	0	0	0.687403	0.161528	CYP1B1;GPM6B
sulfur compound biosynthetic process (GO:0044272)	0.7921	1	0	0	0.642694	0.149792	GCLM
organic anion transport (GO:0015711)	0.797358	1	0	0	0.632411	0.14321	SLC25A16
negative regulation of macromolecule metabolic process (GO:0010605)	0.797358	1	0	0	0.632411	0.14321	HIF1A
vesicle organization (GO:0016050)	0.804999	1	0	0	0.617589	0.133964	SNX2
regulation of protein processing (GO:0070613)	0.807482	1	0	0	0.612801	0.131038	C7
regulation of macromolecule metabolic process (GO:0060255)	0.809933	1	0	0	0.608088	0.128187	HIF1A
negative regulation of cellular process (GO:0048523)	0.810266	1	0	0	0.738798	0.155437	CUL5;PDE3B;CYP1B1;VPS35;KNG1
generation of neurons (GO:0048699)	0.812353	1	0	0	0.603446	0.125408	PEX13
protein glycosylation (GO:0006486)	0.812353	1	0	0	0.603446	0.125408	POGLUT1
cellular response to hypoxia (GO:0071456)	0.817102	1	0	0	0.594371	0.120058	HIF1A
Fc-gamma receptor signaling pathway involved in phagocytosis (GO:0038096)	0.819431	1	0	0	0.589936	0.117483	PIK3CB
Fc-gamma receptor signaling pathway (GO:0038094)	0.82173	1	0	0	0.585566	0.114972	PIK3CB
Fc receptor mediated stimulatory signaling pathway (GO:0002431)	0.824001	1	0	0	0.58126	0.112523	PIK3CB
phagocytosis (GO:0006909)	0.824001	1	0	0	0.58126	0.112523	SLC11A1
regulation of vesicle-mediated transport (GO:0060627)	0.830641	1	0	0	0.568715	0.10553	RAB11A
transcription, DNA-templated (GO:0006351)	0.832506	1	0	0	0.664297	0.121775	FUBP3;TFAM;HIF1A
neuron differentiation (GO:0030182)	0.832798	1	0	0	0.564653	0.103311	CDNF
regulation of small GTPase mediated signal transduction (GO:0051056)	0.834928	1	0	0	0.560648	0.101146	ARHGAP5
negative regulation of sequence-specific DNA binding transcription factor activity (GO:0043433)	0.834928	1	0	0	0.560648	0.101146	CYP1B1
double-strand break repair (GO:0006302)	0.837031	1	0	0	0.5567	0.0990337	POLK
cell-cell adhesion via plasma-membrane adhesion molecules (GO:0098742)	0.839107	1	0	0	0.552807	0.0969716	ROBO1
endocytosis (GO:0006897)	0.849738	1	0	0	0.598874	0.0975133	SNX2;SLC11A1
regulation of gene expression (GO:0010468)	0.851221	1	0	0	0.761574	0.122677	GSK3B;MBNL1;CRABP2;FUBP3;SLC11A1;TFAM;VPS35;PIK3CB;HIF1A;ARNTL2
regulation of G2/M transition of mitotic cell cycle (GO:0010389)	0.852922	1	0	0	0.527009	0.0838406	RAB11A
cellular response to interleukin-1 (GO:0071347)	0.854796	1	0	0	0.523519	0.082136	HIF1A
positive regulation of intracellular protein transport (GO:0090316)	0.858474	1	0	0	0.516676	0.0788439	GSK3B
organelle assembly (GO:0070925)	0.858715	1	0	0	0.629056	0.0958169	UBXN2B;STAM2;RAB11A
spermatogenesis (GO:0007283)	0.860278	1	0	0	0.513321	0.0772544	LGR4
male gamete generation (GO:0048232)	0.86206	1	0	0	0.510009	0.0757011	LGR4
cellular response to oxygen-containing compound (GO:1901701)	0.865359	1	0	0	0.574919	0.0831398	NRIP1;LBP
negative regulation of intracellular signal transduction (GO:1902532)	0.87391	1	0	0	0.487972	0.0657676	PDE3B
protein polyubiquitination (GO:0000209)	0.87702	1	0	0	0.5567	0.0730532	ANKIB1;FBXO30
negative regulation of signal transduction (GO:0009968)	0.87702	1	0	0	0.5567	0.0730532	LGR4;LTF
positive regulation of protein modification process (GO:0031401)	0.877106	1	0	0	0.482021	0.0632062	P2RY1
T cell receptor signaling pathway (GO:0050852)	0.877106	1	0	0	0.482021	0.0632062	PIK3CB
regulation of mitotic cell cycle (GO:0007346)	0.880221	1	0	0	0.476213	0.0607564	STK3
DNA repair (GO:0006281)	0.88309	1	0	0	0.547068	0.0680157	SLC30A9;POLK
cilium assembly (GO:0060271)	0.88309	1	0	0	0.547068	0.0680157	TNPO1;RAB11A
ion transport (GO:0006811)	0.884271	1	0	0	0.545182	0.0670529	ATP6V1A;ATP2B1
positive regulation of MAPK cascade (GO:0043410)	0.884271	1	0	0	0.545182	0.0670529	P2RY1;ROBO1
positive regulation of protein phosphorylation (GO:0001934)	0.896962	1	0	0	0.574223	0.0624418	GHR;FGF7;P2RY1
positive regulation of cellular process (GO:0048522)	0.897966	1	0	0	0.608088	0.0654444	FGF7;NAMPT;LBP;S100A9
Fc-epsilon receptor signaling pathway (GO:0038095)	0.903714	1	0	0	0.431975	0.043734	PIK3CB
Fc receptor signaling pathway (GO:0038093)	0.904944	1	0	0	0.429627	0.0429123	PIK3CB
regulation of intracellular signal transduction (GO:1902531)	0.9058	1	0	0	0.560648	0.0554689	ATP6AP2;PIP4K2A;ARHGAP5
positive regulation of transcription, DNA-templated (GO:0045893)	0.906817	1	0	0	0.705186	0.0689773	EHF;FUBP3;SLC11A1;NAMPT;TFEC;NRIP1;TFAM;FOXN2;HIF1A;ARNTL2
positive regulation of cell proliferation (GO:0008284)	0.907483	1	0	0	0.55801	0.0541718	FGF7;NAMPT;LTF
DNA-templated transcription, initiation (GO:0006352)	0.908538	1	0	0	0.422735	0.040548	TFAM
regulation of cell proliferation (GO:0042127)	0.910755	1	0	0	0.640092	0.0598367	FGF7;CUL5;TNFRSF9;NAMPT;CYP1B1;TNFRSF11B
regulation of cell migration (GO:0030334)	0.912264	1	0	0	0.498747	0.0457978	CYP1B1;ROBO1
RNA processing (GO:0006396)	0.916408	1	0	0	0.407481	0.0355705	MBNL1
cellular response to DNA damage stimulus (GO:0006974)	0.92336	1	0	0	0.479099	0.0382017	CUL5;POLK
positive regulation of ERK1 and ERK2 cascade (GO:0070374)	0.924579	1	0	0	0.391343	0.0306878	P2RY1
regulation of cell growth (GO:0001558)	0.924579	1	0	0	0.391343	0.0306878	S100A9
regulation of MAPK cascade (GO:0043408)	0.926495	1	0	0	0.387507	0.029585	ATP6AP2
regulation of translation (GO:0006417)	0.935368	1	0	0	0.369399	0.0246814	EIF5
regulation of cell cycle (GO:0051726)	0.93701	1	0	0	0.365979	0.0238109	STK3
central nervous system development (GO:0007417)	0.938611	1	0	0	0.362621	0.0229735	S100B
mitotic cell cycle phase transition (GO:0044772)	0.941692	1	0	0	0.356087	0.0213926	CUL5
negative regulation of cell proliferation (GO:0008285)	0.946465	1	0	0	0.434348	0.0238985	CUL5;CYP1B1
regulation of nucleic acid-templated transcription (GO:1903506)	0.951343	1	0	0	0.520075	0.0259418	CRABP2;TFAM;HIF1A;ARNTL2
sensory perception of smell (GO:0007608)	0.954934	1	0	0	0.326659	0.0150633	UBR3
regulation of ERK1 and ERK2 cascade (GO:0070372)	0.958287	1	0	0	0.318756	0.0135814	P2RY1
regulation of immune response (GO:0050776)	0.960384	1	0	0	0.313696	0.0126803	SPPL2A
regulation of cellular macromolecule biosynthetic process (GO:2000112)	0.960606	1	0	0	0.500325	0.0201086	CRABP2;TFAM;HIF1A;ARNTL2
protein modification by small protein conjugation (GO:0032446)	0.963254	1	0	0	0.396248	0.0148348	UBR3;HIF1A
antigen receptor-mediated signaling pathway (GO:0050851)	0.963333	1	0	0	0.306401	0.0114458	PIK3CB
MAPK cascade (GO:0000165)	0.972037	1	0	0	0.283338	0.00803589	FGF7
DNA metabolic process (GO:0006259)	0.982439	1	0	0	0.250957	0.00444625	POLK
sensory perception of chemical stimulus (GO:0007606)	0.985157	1	0	0	0.24101	0.00360402	UBR3
cellular macromolecule biosynthetic process (GO:0034645)	0.99116	1	0	0	0.214814	0.00190747	FUBP3
regulation of transcription from RNA polymerase II promoter (GO:0006357)	0.991874	1	0	0	0.534492	0.00436107	EHF;FUBP3;SATB1;SLC11A1;NAMPT;TFEC;NRIP1;TFAM;HIF1A;ARNTL2
negative regulation of transcription from RNA polymerase II promoter (GO:0000122)	0.994335	1	0	0	0.279334	0.00158681	SATB1;NRIP1
gene expression (GO:0010467)	0.995006	1	0	0	0.191872	0.000960585	FUBP3
transcription from RNA polymerase II promoter (GO:0006366)	0.998093	1	0	0	0.162657	0.000310414	HIF1A
negative regulation of cellular macromolecule biosynthetic process (GO:2000113)	0.998659	1	0	0	0.154096	0.000206774	GSK3B
regulation of transcription, DNA-templated (GO:0006355)	0.998761	1	0	0	0.444942	0.000551683	EHF;CRABP2;FUBP3;SATB1;NRIP1;TFAM;FOXN2;HIF1A;ARNTL2
negative regulation of gene expression (GO:0010629)	0.999663	1	0	0	0.127708	4.30003e-05	HIF1A
negative regulation of transcription, DNA-templated (GO:0045892)	0.999695	1	0	0	0.194229	5.92507e-05	SATB1;NRIP1
