# Supplementary material for: Molecular mechanisms of fat deposition: &lt;i&gt;IL-6&lt;/i&gt; is a hub gene in fat lipolysis, comparing thin-tailed with fat-tailed sheep breeds
Source: Copernicus journal article supplement (doi:10.5194/aab-64-53-2021), 2021-02-17
Supplement: Supplementary file 6 [file S6.xlsx]

## Sheet: Sheet1
Gene	Log2 fold_change, Current study (Ghezel vs Zel comparison)	Log2 fold_change, Bakhtiarizadeh et al(2019)study(LoriBakhtiari vs Zel comparison)
ATP6V1A	-1.88229	-1.26007
ENPEP	-3.77617	-2.23716
FGF7	-2.41261	-0.27605
HIF1A	-2.99295	-0.286312
IDI1	-2.31991	-1.2219
LGR4	-1.63629	-1.36746
LIPG	5.65689	1.90909
NNT	-1.82217	1.88295
SEL1L	-1.48781	-1.01356
SOCS3	3.36213	2.31549
TFRC	-1.80786	-1.0292
AK4	-3.15407	-2.26308
ARID5A	3.06621	2.92004
EDIL3	-1.86444	-2.42949
ENPEP	-3.77617	-2.23716
ENSOARG00000000313	-2.0119	-1.84356
ENSOARG00000002937	-3.2521	-3.26387
ENSOARG00000006817	-3.14016	-1.85716
ENSOARG00000008550	-3.62927	-4.47392
ENSOARG00000009963	3.61824	-3.03496
ENSOARG00000010049	-2.18165	-1.85582
ENSOARG00000011251	-2.14966	6.52653
ENSOARG00000014981	2.16781	1.98636
GADD45B	3.21464	1.67896
KCND3	-1.00074	-2.54334
LIPG	5.65689	1.90909
MAFF	2.08468	3.19323
JUNB	2.3411	-2.1112
PPM1K	-1.66725	-2.3443
S100A8	-2.23529	-5.25472
S100A9	-3.51441	-2.85246
SLC2A3	1.44331	2.30067
SOCS3	3.36213	2.31549
STC1	3.55924	-2.57368
TNNC1	2.7764	4.42703
