# Supplementary material for: Molecular mechanisms of fat deposition: &lt;i&gt;IL-6&lt;/i&gt; is a hub gene in fat lipolysis, comparing thin-tailed with fat-tailed sheep breeds
Source: Copernicus journal article supplement (doi:10.5194/aab-64-53-2021), 2021-02-17
Supplement: Supplementary file [file aab-64-53-2021-supplement-title-page.pdf › aab-64-53-2021-supplement-title-page.pdf]

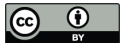

## *Supplement of*

# **Molecular mechanisms of fat deposition: *IL-6* is a hub gene in fat lipolysis, comparing thin-tailed with fat-tailed sheep breeds**

**Sana Farhadi et al.**

*Correspondence to:* Sana Farhadi (farhadiso16@tabrizu.ac.ir)

- [aab-64-53-2021-supplement-title-page.pdf](#)
- Supplementary
  - [S1.xlsx](#)
  - [S2.xlsx](#)
  - [S3.xlsx](#)
  - [S4.xlsx](#)
  - [S5.xlsx](#)
  - [S6.xlsx](#)

The copyright of individual parts of the supplement might differ from the CC BY 4.0 License.
